# Supplementary material
Source: PubMed Central journal article supplement (PMC2615069)
Supplement: NIHMS82153-supplement-supplement_1.pdf [file NIHMS82153-supplement-supplement_1.pdf]

**Table. S1. Significant changes in the gene expression after 9-*cis*-retinyl acetate treatment in the whole eye<sup>a</sup>.**

| Changes in the expression             | S.D. <sup>b</sup> | Description <sup>c</sup> | Symbol        | Gene name                                                                                    |
|---------------------------------------|-------------------|--------------------------|---------------|----------------------------------------------------------------------------------------------|
| <b>Increased (more than 2.0 fold)</b> |                   |                          |               |                                                                                              |
| 5.56                                  | 1.61              | X16670                   | not found     | Mouse RNA for type IIB intracisternal A-particle (IAP) element encoding integrase            |
| 5.49                                  | 1.37              | Mm.255292                | Gabrg1        | Gamma-aminobutyric acid (GABA-A) receptor, subunit gamma 1                                   |
| 5.45                                  | 2.89              | BC044668                 | not found     | Mus musculus, clone IMAGE:3492886                                                            |
| 5.20                                  | 1.22              | Mm.9002                  | Ube3a         | Ube3a: Ubiquitin protein ligase E3A, transcript variant 2                                    |
| 4.82                                  | 1.54              | Mm.378496                | 4930527E24Rik | PREDICTED: Mus musculus RIKEN cDNA 4930527E24 gene                                           |
| 4.55                                  | 0.55              | Mm.14300                 | Xmr           | Xlr-related, meiosis regulated                                                               |
| 4.54                                  | 0.98              | Mm.109633                | 4930595M18Rik | RIKEN cDNA 4930595M18 gene                                                                   |
| 4.22                                  | 1.12              | Mm.337649                | not found     | Activated spleen cDNA, RIKEN                                                                 |
| 4.21                                  | 0.93              | Mm.320593                | Dach1         | DACH protein                                                                                 |
| 4.17                                  | 0.19              | Mm.305393                | Plf           | Mitogen regulated protein, proliferin 3                                                      |
| 4.16                                  | 2.07              | BC044668                 | not found     | Mus musculus, clone IMAGE:3492886                                                            |
| 4.10                                  | 0.99              | Mm.124595                | A330008L17Rik | RIKEN cDNA A330008L17 gene                                                                   |
| 4.08                                  | 0.93              | Mm.229114                | BC004690      | CDNA sequence BC004690                                                                       |
| 3.90                                  | 0.85              | Mm.5040                  | Htr1f         | 5-hydroxytryptamine (serotonin) receptor 1F                                                  |
| 3.87                                  | 1.52              | Mm.375125                | pCEPa88       | Non-allelic mRNA for pancreatic alpha-amylase isozyme 3' end                                 |
| 3.86                                  | 1.75              | X16670                   | not found     | Mouse RNA for type IIB intracisternal A-particle (IAP) element encoding integrase, clone 106 |
| 3.79                                  | 0.66              | Mm.196822                | Krtap16-9     | Keratin associated protein 16-9                                                              |
| 3.77                                  | 0.66              | Mm.304287                | LOC382133     | Similar to RIKEN cDNA 1700029H17                                                             |
| 3.71                                  | 0.63              | Mm.245406                | not found     | Clone NIA:K0976C05 unknown                                                                   |

|      |      |           |               |                                                                                              |
|------|------|-----------|---------------|----------------------------------------------------------------------------------------------|
| 3.71 | 0.43 | Mm.38762  | Elmod2        | ELMO domain containing 2                                                                     |
| 3.69 | 0.64 | Mm.291725 | not found     | Similar to spermiogenesis specific transcript on the Y 2 (LOC435023)                         |
| 3.67 | 1.77 | M12312    | not found     | Mouse (strain 129 G-IX+) endogenous murine leukemia virus                                    |
| 3.67 | 0.08 | Mm.271252 | 2610036F08Rik | RIKEN cDNA 2610036F08 gene                                                                   |
| 3.63 | 1.81 | BC002127  | not found     | Mus musculus, clone IMAGE                                                                    |
| 3.61 | 0.55 | Mm.80120  | not found     | Adult male olfactory brain cDNA                                                              |
| 3.60 | 0.44 | Mm.101504 | C530008M17Rik | RIKEN cDNA C530008M17 gene                                                                   |
| 3.57 | 1.18 | Mm.313321 | Rfx3          | Regulatory factor X, 3 (influences HLA class II expression)                                  |
| 3.56 | 1.00 | Mm.129498 | Srd5a2l2      | Steroid 5 alpha-reductase 2-like 2                                                           |
| 3.56 | 0.89 | Mm.221412 | Hdgfrp3       | Hdgfrp3: Hepatoma-derived growth factor, related protein 3                                   |
| 3.56 | 1.65 | Mm.272733 | 2810426N06Rik | RIKEN cDNA 2810426N06 gene                                                                   |
| 3.51 | 0.75 | Mm.28152  | 1200016D23Rik | 1200016D23Rik: SCY1-like 3 (S. cerevisiae)                                                   |
| 3.50 | 0.30 | Mm.39101  | Fut9          | Fucosyltransferase 9                                                                         |
| 3.48 | 0.57 | Mm.260760 | Sh3bgrl       | SH3-binding domain glutamic acid-rich protein like                                           |
| 3.47 | 1.05 | Mm.14255  | Apbb1ip       | Apbb1ip: Amyloid beta (A4) precursor protein-binding, family B, member 1 interacting protein |
| 3.43 | 0.49 | Mm.379940 | Cfh           | Cfh: Complement component factor h                                                           |
| 3.43 | 0.92 | Mm.133101 | Shprh         | Shprh: SNF2 histone linker PHD RING helicase                                                 |
| 3.42 | 0.60 | Mm.304354 | Sly           | Sycp3 like Y-linked (Sly)                                                                    |
| 3.42 | 1.04 | X16670    | not found     | not found                                                                                    |
| 3.41 | 0.33 | Mm.328751 | Zdhhc14       | Zinc finger, DHHC domain containing 14                                                       |
| 3.40 | 0.58 | Mm.222517 | Dhtkd1        | Dhtkd1: MKIAA1630 protein                                                                    |
| 3.39 | 0.63 | Mm.7060   | Naalad2       | Naalad2: N-acetylated alpha-linked acidic dipeptidase 2                                      |
| 3.38 | 0.48 | Mm.326477 | Zfp445        | Zfp445: Zinc finger protein 445                                                              |
| 3.37 | 0.79 | Mm.103382 | Ppfibp1       | Ppfibp1: MKIAA1230 protein                                                                   |
| 3.35 | 0.31 | Mm.181061 | Phyhip1       | Phyhip1: Phytanoyl-CoA hydroxylase interacting protein-like                                  |
| 3.34 | 0.61 | AK045941  | not found     | Mus musculus adult male corpora quadrigemina cDNA                                            |

|      |      |           |               |                                                                  |
|------|------|-----------|---------------|------------------------------------------------------------------|
| 3.34 | 0.80 | Mm.380192 | Ott           | PREDICTED: Mus musculus similar to Ott protein (LOC546386)       |
| 3.32 | 0.87 | U16670    | not found     | Mus musculus clone CCD40 LINE-1 element ORF1                     |
| 3.31 | 0.27 | Mm.108239 | Pramel3       | Preferentially expressed antigen in melanoma-like 3              |
| 3.30 | 0.69 | AK011924  | not found     | Mus musculus 10 days embryo whole body cDNA                      |
| 3.29 | 0.65 | Mm.359011 | 5330408M12Rik | Transmembrane protein 67                                         |
| 3.28 | 1.19 | Mm.304287 | LOC382133     | Similar to RIKEN cDNA 1700029H17                                 |
| 3.28 | 0.38 | Mm.253264 | 6030408C04Rik | RIKEN cDNA 6030408C04 gene                                       |
| 3.27 | 0.76 | Mm.328807 | Lnpep         | Leucyl/cystinyl aminopeptidase                                   |
| 3.26 | 0.87 | Mm.159452 | 4930542N07Rik | RIKEN cDNA 4930542N07 gene                                       |
| 3.26 | 0.44 | Mm.327405 | Ott           | Ovary testis transcribed                                         |
| 3.24 | 0.30 | Mm.252404 | C630025C03    | Hypothetical protein C630025C03                                  |
| 3.23 | 0.56 | Mm.296022 | Mme           | Membrane metallo endopeptidase                                   |
| 3.21 | 0.56 | Mm.247383 | Gm1961        | Gm1961: Gene model 1961, (NCBI)                                  |
| 3.20 | 0.54 | Mm.222639 | V1re3         | Vomer nasal 1 receptor, E3                                       |
| 3.20 | 0.48 | Mm.55711  | not found     | CDNA clone MGC:58416 IMAGE:6707555                               |
| 3.19 | 0.68 | Mm.41728  | Echdc1        | Echdc1: Enoyl Coenzyme A hydratase domain containing 1           |
| 3.17 | 0.56 | Mm.271252 | 2610036F08Rik | RIKEN cDNA 2610036F08 gene                                       |
| 3.17 | 0.46 | Mm.363960 | Tmed5         | Tmed5: Transmembrane emp24 protein transport domain containing 5 |
| 3.17 | 0.64 | Mm.33870  | Elp4          | Elongation protein 4 homolog ( <i>S. cerevisiae</i> )            |
| 3.12 | 1.04 | Mm.179050 | Hormad1       | HORMA domain containing 1                                        |
| 3.11 | 0.44 | Mm.383294 | Gpr82         | G protein-coupled receptor 82                                    |
| 3.10 | 0.56 | Mm.313904 | 9430031J16Rik | 9430031J16Rik: RIKEN cDNA 9430031J16 gene                        |
| 3.10 | 0.71 | Mm.259595 | Zfhx1b        | Zinc finger homeobox 1b                                          |
| 3.09 | 0.59 | Mm.304287 | LOC382133     | Similar to RIKEN cDNA 1700029H17                                 |
| 3.08 | 0.63 | Mm.304354 | Sly           | Syp3 like Y-linked                                               |
| 3.08 | 0.53 | Mm.42140  | Zfp53         | Zinc finger protein 53                                           |

|      |      |           |               |                                                                              |
|------|------|-----------|---------------|------------------------------------------------------------------------------|
| 3.06 | 0.93 | Mm.259333 | Pik3r1        | Phosphatidylinositol 3-kinase, regulatory subunit, polypeptide 1 (p85 alpha) |
| 3.06 | 0.58 | Mm.244348 | Lrrtm3        | Lrrtm3: Leucine rich repeat transmembrane neuronal 3                         |
| 3.06 | 0.62 | Mm.129498 | Srd5a2l2      | Steroid 5 alpha-reductase 2-like 2                                           |
| 3.05 | 0.60 | Mm.63546  | 5430406M13Rik | PREDICTED: RIKEN cDNA 5430406M13 [Mus musculus]                              |
| 3.05 | 0.36 | Mm.360649 | A830006F12Rik | A830006F12Rik: RIKEN cDNA A830006F12 gene                                    |
| 3.05 | 0.52 | Mm.11662  | Slco4c1       | Slco4c1: Solute carrier organic anion transporter family, member 4C1         |
| 3.05 | 0.41 | AB010312  | not found     | Mus musculus mRNA for mszf11, partial cDNA                                   |
| 3.04 | 0.77 | Mm.29201  | Gbe1          | Glucan (1,4-alpha-), branching enzyme 1                                      |
| 3.04 | 0.45 | Mm.278584 | Ccnc          | Cyclin C                                                                     |
| 3.03 | 0.06 | Mm.110270 | B230217C12Rik | PREDICTED: RIKEN cDNA B230217C12 [Mus musculus]                              |
| 3.02 | 0.38 | Mm.38271  | Rgs13         | Rgs13: Regulator of G-protein signaling 13                                   |
| 3.01 | 0.36 | Mm.102970 | Mtmr13        | Mtmr13: Myotubularin related protein 13                                      |
| 3.01 | 0.92 | Mm.195092 | Zfp260        | Zfp260: Zinc finger protein 260                                              |
| 3.01 | 0.31 | Mm.87352  | Rnf32         | Ring finger protein 32                                                       |
| 3.00 | 0.61 | Mm.175502 | 2010109A12Rik | Adult male small intestine cDNA                                              |
| 2.98 | 0.63 | Mm.137011 | Tbx22         | T-box 22                                                                     |
| 2.98 | 0.39 | Mm.220204 | Osbpl8        | Osbpl8: Oxysterol binding protein-like 8 (Osbpl8), transcript variant 2      |
| 2.97 | 0.43 | Mm.320791 | Gpc5          | Glypican 5                                                                   |
| 2.97 | 0.22 | Mm.26794  | 2010321J07Rik | UDP glucuronosyltransferase 2 family, polypeptide A3                         |
| 2.96 | 0.35 | NM_178606 | not found     | Mus musculus DNA segment                                                     |
| 2.96 | 0.96 | Mm.415    | Iapp          | Iapp: Islet amyloid polypeptide                                              |
| 2.94 | 0.08 | Mm.133101 | Shprh         | Shprh: SNF2 histone linker PHD RING helicase                                 |
| 2.94 | 0.24 | Mm.93759  | E030025D05Rik | RIKEN cDNA E030025D05 gene                                                   |
| 2.94 | 0.49 | AK052529  | not found     | Mus musculus 13 days embryo lung cDNA                                        |
| 2.92 | 0.29 | Mm.144157 | Ghrh          | Ghrh: Growth hormone releasing hormone                                       |
| 2.92 | 0.61 | Mm.46005  | 2600011C06Rik | RIKEN cDNA 2600011C06 gene                                                   |

|      |      |           |               |                                                                                               |
|------|------|-----------|---------------|-----------------------------------------------------------------------------------------------|
| 2.90 | 0.17 | Mm.5309   | Gabrg2        | Gabrg2: Gamma-aminobutyric acid (GABA-A) receptor, subunit gamma 2                            |
| 2.90 | 0.69 | Mm.146262 | B230315F11Rik | RIKEN cDNA B230315F11 gene                                                                    |
| 2.90 | 0.58 | Mm.304287 | LOC382133     | Similar to RIKEN cDNA 1700029H17                                                              |
| 2.89 | 0.22 | Mm.10929  | Fmo2          | Fmo2: Flavin containing monooxygenase 2                                                       |
| 2.88 | 0.16 | Mm.197520 | Fbxo5         | Fbxo5: F-box only protein 5                                                                   |
| 2.88 | 0.87 | Mm.209844 | Plekhk1       | Plekhk1: Membrane-bound factor MBF1                                                           |
| 2.88 | 0.46 | AK087573  | not found     | Mus musculus 2 days pregnant adult female oviduct cDNA                                        |
| 2.88 | 0.50 | Mm.377319 | Olfr208       | Olfactory receptor 208 (Olfr208)                                                              |
| 2.87 | 0.47 | Mm.255292 | Gabrg1        | Gamma-aminobutyric acid (GABA-A) receptor, subunit gamma 1                                    |
| 2.86 | 0.39 | Mm.99517  | D930038D03Rik | RIKEN cDNA D930038D03 gene                                                                    |
| 2.85 | 0.79 | X16669    | not found     | Mouse mRNA for type IIB intracisternal A-particle (IAP) element encoding integrase, clone 103 |
| 2.85 | 0.26 | Mm.45843  | Slc6a15       | Slc6a15: Solute carrier family 6 (neurotransmitter transporter), member 15                    |
| 2.85 | 0.77 | Mm.215159 | Plekhk2       | Pleckstrin homology domain containing, family H (with MyTH4 domain) member 2                  |
| 2.84 | 0.14 | Mm.271334 | Olfr1080      | Olfactory receptor 1080                                                                       |
| 2.84 | 0.44 | Mm.297657 | B230312I18Rik | RIKEN cDNA B230312I18 gene                                                                    |
| 2.83 | 0.76 | Mm.304354 | Sly           | Sycp3 like Y-linked                                                                           |
| 2.83 | 0.14 | AK035861  | not found     | Mus musculus 16 days neonate cerebellum cDNA                                                  |
| 2.83 | 0.77 | Mm.223407 | Olfr1054      | Olfactory receptor 1054                                                                       |
| 2.83 | 0.33 | Mm.321671 | Cntn6         | Cntn6: Contactin 6                                                                            |
| 2.82 | 0.60 | Mm.259969 | 1110030H10Rik | LysM, putative peptidoglycan-binding, domain containing 3                                     |
| 2.80 | 0.08 | Mm.26760  | Lrrc19        | Leucine rich repeat containing 19                                                             |
| 2.80 | 0.22 | Mm.359528 | Ssty2         | Spermiogenesis specific transcript on the Y 2                                                 |
| 2.79 | 0.55 | Mm.335300 | Hcrtr2        | Hcrtr2: Hypocretin (orexin) receptor 2                                                        |
| 2.79 | 0.46 | Mm.311840 | Dlgap1        | Discs, large (Drosophila) homolog-associated protein 1, transcript variant 2                  |
| 2.79 | 0.84 | Mm.261453 | Ect2          | Ect2 oncogene                                                                                 |
| 2.78 | 0.26 | Mm.381759 | not found     | CDNA clone IMAGE:6819153                                                                      |

|      |      |           |               |                                                                                        |
|------|------|-----------|---------------|----------------------------------------------------------------------------------------|
| 2.77 | 0.38 | Mm.302938 | Ddx3y         | DEAD (Asp-Glu-Ala-Asp) box polypeptide 3, Y-linked3470                                 |
| 2.77 | 0.18 | Mm.108037 | Cyp2r1        | Cyp2r1: Cytochrome P450 2R1                                                            |
| 2.77 | 0.41 | Mm.377538 | Olf945        | Olf945: Olfactory receptor 945                                                         |
| 2.76 | 0.36 | Mm.259632 | Cadps2        | Cadps2: Ca <sup>2+</sup> -dependent activator protein for secretion 2                  |
| 2.76 | 0.65 | Mm.10763  | Diap2         | Dia protein                                                                            |
| 2.76 | 0.13 | Mm.77065  | Zbtb1         | Zinc finger and BTB domain containing 1                                                |
| 2.76 | 0.38 | Mm.276400 | F730023N20    | Hypothetical protein F730023N20                                                        |
| 2.76 | 0.60 | Mm.246610 | 4831428F09    | 4831428F09: Hypothetical protein 4831428F09                                            |
| 2.75 | 0.41 | Mm.212411 | Phf14         | Phf14: PHD finger protein 14                                                           |
| 2.74 | 0.41 | Mm.123811 | not found     | 3 days neonate thymus cDNA                                                             |
| 2.74 | 0.22 | AK051807  | not found     | Mus musculus 12 days embryo eyeball cDNA                                               |
| 2.74 | 0.45 | Mm.174256 | Tpr           | Tpr: Translocated promoter region                                                      |
| 2.74 | 0.33 | Mm.19298  | Atp6v0d2      | ATPase, H <sup>+</sup> transporting, V0 subunit D, isoform 2                           |
| 2.72 | 0.62 | Mm.349819 | not found     | Clone NIA:C0333F07 unknown                                                             |
| 2.71 | 0.22 | Mm.330387 | Olf1257       | Olfactory receptor 1257                                                                |
| 2.71 | 0.43 | Mm.134093 | Sema3e        | Sema domain, immunoglobulin domain (Ig), short basic domain, secreted, (semaphorin) 3E |
| 2.71 | 0.61 | Mm.6824   | Sult1d1       | Sulfotransferase family 1D, member 1                                                   |
| 2.71 | 0.60 | Mm.387244 | 9930116O05Rik | In vitro fertilized eggs cDNA                                                          |
| 2.70 | 0.12 | Mm.204670 | Txndc1        | Thioredoxin domain containing 1                                                        |
| 2.70 | 0.30 | Mm.278726 | Mak3          | Mak3 homolog ( <i>S. cerevisiae</i> )                                                  |
| 2.70 | 0.34 | Mm.377900 | V1rd12        | Vomer nasal 1 receptor, D12                                                            |
| 2.69 | 0.46 | NM_175435 | not found     | not found                                                                              |
| 2.69 | 0.10 | Mm.57223  | Hells         | Helicase, lymphoid specific                                                            |
| 2.69 | 0.36 | Mm.222640 | V1rc25        | V1rc25: Vomer nasal 1 receptor, C25                                                    |
| 2.69 | 0.59 | Mm.242576 | Dgkb          | Diacylglycerol kinase, beta                                                            |
| 2.68 | 0.69 | Mm.237772 | Mup1          | Major urinary protein 1                                                                |

|      |      |           |               |                                                                        |
|------|------|-----------|---------------|------------------------------------------------------------------------|
| 2.68 | 0.20 | Mm.8062   | Zic4          | Zic4: Zinc finger protein of the cerebellum 4                          |
| 2.68 | 0.31 | Mm.223388 | Olf181        | Olfactory receptor 181                                                 |
| 2.68 | 0.52 | Mm.89985  | V1rb2         | V1rb2: Vomeronasal 1, receptor B2                                      |
| 2.67 | 0.35 | Mm.358972 | BC021442      | CDNA sequence BC021442                                                 |
| 2.67 | 0.18 | Mm.3645   | Myo5a         | Myo5a: Myosin Va                                                       |
| 2.66 | 0.29 | Mm.377184 | V1re2         | Vomeronasal 1 receptor, E2                                             |
| 2.66 | 0.27 | Mm.260376 | 4921524P20Rik | WD repeat domain 56                                                    |
| 2.65 | 0.29 | Mm.136985 | D230044M03Rik | PREDICTED: hypothetical protein LOC76743                               |
| 2.65 | 0.49 | Mm.173186 | C130092O11Rik | PREDICTED: Mus musculus RIKEN cDNA C130092O11 gene                     |
| 2.65 | 0.14 | Mm.125298 | Hecw1         | NEDL1 mRNA for HECT type E3 ubiquitin ligase                           |
| 2.63 | 0.17 | Mm.287857 | Plagl1        | Plagl1: Lost on transformation protein 1                               |
| 2.63 | 0.60 | Mm.386804 | 4933426I21Rik | RIKEN cDNA 4933426I21 gene                                             |
| 2.63 | 0.48 | Mm.79760  | Dach2         | Dachshund 2 (Drosophila)                                               |
| 2.62 | 0.12 | Mm.46389  | Krtap3-2      | Keratin associated protein 3-2                                         |
| 2.61 | 0.35 | Mm.30424  | Ptger3        | Prostaglandin E receptor 3                                             |
| 2.61 | 0.49 | Mm.20000  | Dhx9          | Dhx9: DEAH (Asp-Glu-Ala-His) box polypeptide 9                         |
| 2.60 | 0.45 | Mm.158971 | 1110001J03Rik | RIKEN cDNA 1110001J03 gene                                             |
| 2.59 | 0.31 | Mm.276279 | Zfp667        | Zinc finger protein 667                                                |
| 2.59 | 0.53 | Mm.291779 | Mto1          | Mto1: Mitochondrial translation optimization 1 homolog (S. cerevisiae) |
| 2.59 | 0.37 | Mm.70690  | BC034664      | CDNA sequence BC034664                                                 |
| 2.57 | 0.41 | Mm.20477  | Uty           | Ubiquitously transcribed tetratricopeptide repeat gene, Y chromosome   |
| 2.57 | 0.13 | Mm.38249  | Fem1c         | MKIAA1785 protein                                                      |
| 2.56 | 0.20 | Mm.34606  | Hrb2          | Hrb2: HIV-1 Rev binding protein 2                                      |
| 2.56 | 0.47 | Mm.222990 | Olf1143       | Olfactory receptor 1143                                                |
| 2.56 | 0.34 | Mm.261270 | Ifi203        | Ifi203: Interferon activated gene 203                                  |
| 2.56 | 0.19 | Mm.377221 | V1rh10        | Vomeronasal 1 receptor, H10                                            |

|      |      |           |               |                                                                                         |
|------|------|-----------|---------------|-----------------------------------------------------------------------------------------|
| 2.56 | 0.39 | Mm.383186 | Npn1          | Npn1: Hag2 mRNA for hypothetical protein                                                |
| 2.55 | 0.39 | Mm.260751 | Klf8          | Kruppel-like factor 8                                                                   |
| 2.55 | 0.28 | Mm.377687 | Olf915        | Olf915: Olfactory receptor 915                                                          |
| 2.55 | 0.47 | Mm.33206  | 1300013D05Rik | RIKEN cDNA 1300013D05 gene                                                              |
| 2.53 | 0.15 | Mm.212462 | 1700065D16Rik | Protein kinase ATR                                                                      |
| 2.53 | 0.22 | Mm.291799 | Rdh11         | Retinol dehydrogenase 11                                                                |
| 2.53 | 0.13 | Mm.57084  | Spr2j         | Small proline-rich protein 2J                                                           |
| 2.53 | 0.31 | Mm.272223 | Slco1b2       | Solute carrier organic anion transporter family, member 1b2, transcript variant 1       |
| 2.53 | 0.43 | Mm.301900 | Cyp3a25       | Cytochrome P450, family 3, subfamily a, polypeptide 25                                  |
| 2.52 | 0.02 | Mm.2958   | Cdkn1b        | Cyclin-dependent kinase inhibitor 1B (P27),                                             |
| 2.51 | 0.55 | Mm.251087 | 2010316F05Rik | RIKEN cDNA 2010316F05 gene                                                              |
| 2.51 | 0.44 | Mm.90181  | Aldh8a1       | Aldehyde dehydrogenase 8 family, member A1                                              |
| 2.51 | 0.18 | Mm.231332 | Cep1          | Centrosomal protein 1                                                                   |
| 2.51 | 0.48 | AK084861  | not found     | Mus musculus 13 days embryo lung cDNA                                                   |
| 2.50 | 0.16 | Mm.208125 | Adamts6       | Mus musculus a disintegrin-like and metalloprotease with thrombospondin type 1 motif, 6 |
| 2.50 | 0.45 | Mm.379343 | BC029127      | cDNA sequence BC029127                                                                  |
| 2.50 | 0.52 | Mm.103665 | Slco1a1       | Organic anion transporting polypeptide 1                                                |
| 2.50 | 0.13 | Mm.45843  | Slc6a15       | Solute carrier family 6 (neurotransmitter transporter), member 15                       |
| 2.50 | 0.22 | Mm.377700 | Olf965        | Olfactory receptor 665                                                                  |
| 2.49 | 0.12 | Mm.377172 | V1rc19        | Vomerolateral 1 receptor, C19                                                           |
| 2.48 | 0.30 | Mm.373566 | Ttc14         | Tetratricopeptide repeat domain 14                                                      |
| 2.48 | 0.37 | Mm.304354 | Sly           | Sycp3 like Y-linked                                                                     |
| 2.47 | 0.15 | Mm.150047 | 6530406M24Rik | ATP/GTP binding protein-like 3                                                          |
| 2.47 | 0.25 | Mm.298242 | Lgals12       | Lectin, galactose binding, soluble 12                                                   |
| 2.47 | 0.46 | Mm.378496 | 4930527E24Rik | Mus musculus RIKEN cDNA 4930527E24 gene                                                 |
| 2.46 | 0.16 | Mm.330516 | Ubr1          | Ubiquitin protein ligase E3 component n-recognin 1                                      |



|      |      |           |               |                                                                          |
|------|------|-----------|---------------|--------------------------------------------------------------------------|
| 2.46 | 0.33 | Mm.94461  | A330019N05Rik | RIKEN cDNA A330019N05 gene                                               |
| 2.46 | 0.35 | Mm.285366 | BC061928      | MKIAA1613 protein                                                        |
| 2.46 | 0.30 | Mm.246018 | 4631402N15Rik | RIKEN cDNA 4631402N15 gene                                               |
| 2.45 | 0.12 | Mm.35764  | Mobk11a       | Mps One Binder kinase activator-like 1A (yeast)                          |
| 2.45 | 0.25 | Mm.354863 | B630005N14Rik | RIKEN cDNA B630005N14 gene                                               |
| 2.44 | 0.37 | Mm.334011 | Me3           | Me3: Malic enzyme 3, NADP(+)-dependent, mitochondrial                    |
| 2.44 | 0.34 | Mm.257316 | Chm           | Choroideremia                                                            |
| 2.44 | 0.05 | Mm.46932  | Slc17a5       | Solute carrier family 17 (anion/sugar transporter), member 5             |
| 2.43 | 0.21 | Mm.316402 | Kcnab1        | Potassium voltage-gated channel, shaker-related subfamily, beta member 1 |
| 2.43 | 0.19 | Mm.290758 | E430028B21Rik | RIKEN cDNA E430028B21 gene                                               |
| 2.43 | 0.35 | Mm.377569 | Olfr843       | Olfr843: Olfactory receptor 843                                          |
| 2.43 | 0.13 | Mm.377695 | Olfr878       | Olfactory receptor 878                                                   |
| 2.42 | 0.35 | Mm.51259  | BC035537      | BC035537: CDNA sequence BC035537                                         |
| 2.42 | 0.26 | Mm.210334 | Mbtd1         | Mbt domain containing 1                                                  |
| 2.40 | 0.17 | Mm.377563 | Olfr803       | Olfactory receptor 803                                                   |
| 2.39 | 0.41 | Mm.29366  | Rsbn1         | Rosbin, round spermatid basic protein 1                                  |
| 2.38 | 0.28 | Mm.292470 | AA545217      | Expressed sequence AA545217                                              |
| 2.38 | 0.36 | Mm.915    | Il2ra         | Interleukin 2 receptor, alpha chain                                      |
| 2.38 | 0.23 | S71494    | not found     | SmD homolog                                                              |
| 2.38 | 0.22 | Mm.74605  | Faim          | Fas-apoptosis inhibitory molecule                                        |
| 2.38 | 0.23 | Mm.196472 | Twistnb       | TWIST neighbor                                                           |
| 2.38 | 0.32 | Mm.108239 | Pramel3       | Preferentially expressed antigen in melanoma-like 3                      |
| 2.37 | 0.29 | AK037041  | not found     | Mus musculus adult female vagina cDNA                                    |
| 2.37 | 0.11 | Mm.269995 | Etv6          | Ets variant gene 6 (TEL oncogene)                                        |
| 2.37 | 0.27 | Mm.377176 | V1rc24        | Vomeronasal 1 receptor, C24                                              |
| 2.36 | 0.29 | Mm.215971 | Ebf1          | Early B-cell factor 1                                                    |

|      |      |           |               |                                                                          |
|------|------|-----------|---------------|--------------------------------------------------------------------------|
| 2.36 | 0.30 | Mm.2197   | Ambp          | Alpha 1 microglobulin/bikunin                                            |
| 2.36 | 0.28 | Mm.87321  | Catsper1      | Cation channel of sperm 1                                                |
| 2.36 | 0.29 | Mm.234715 | A830016G23Rik | Cadherin 10                                                              |
| 2.36 | 0.30 | Mm.193276 | C130026L21Rik | RIKEN cDNA C130026L21 gene                                               |
| 2.36 | 0.32 | Mm.363074 | not found     | Strain C57BL odorant receptor B3                                         |
| 2.36 | 0.21 | Mm.306021 | Ugt8          | UDP galactosyltransferase 8A                                             |
| 2.34 | 0.33 | Mm.7336   | Ccr12         | Chemokine (C-C motif) receptor-like 2                                    |
| 2.34 | 0.08 | Mm.142187 | A230083G16Rik | RIKEN cDNA A230083G16 gene                                               |
| 2.33 | 0.28 | Mm.119343 | Rdh14         | Retinol dehydrogenase 14 (all-trans and 9-cis)                           |
| 2.33 | 0.26 | Mm.254370 | Clcn5         | Chloride channel 5                                                       |
| 2.33 | 0.08 | Mm.325190 | 5730577I03Rik | RIKEN cDNA 5730577I03 gene                                               |
| 2.33 | 0.16 | Mm.196405 | Hsd3b2        | Hydroxysteroid dehydrogenase-2, delta<5>-3-beta                          |
| 2.33 | 0.15 | Mm.45054  | Gda           | Guanine deaminase                                                        |
| 2.32 | 0.26 | Mm.101504 | C530008M17Rik | RIKEN cDNA C530008M17 gene                                               |
| 2.32 | 0.24 | U16672    | not found     | Mus musculus clone NCD40 LINE-1 element ORF1                             |
| 2.32 | 0.23 | Mm.15793  | Tgtp          | Tgtp: T-cell specific GTPase                                             |
| 2.32 | 0.22 | Mm.259310 | D230039L06Rik | D230039L06Rik: RIKEN cDNA D230039L06 gene                                |
| 2.31 | 0.21 | AK045798  | not found     | Mus musculus adult male corpora quadrigemina cDNA                        |
| 2.30 | 0.20 | Mm.234437 | Herc4         | Herc4: Hect domain and RLD 4                                             |
| 2.30 | 0.22 | Mm.269823 | 9.83E+11      | Hypothetical protein 9830102E05                                          |
| 2.29 | 0.19 | Mm.210497 | Emr4          | EGF-like module containing, mucin-like, hormone receptor-like sequence 4 |
| 2.28 | 0.09 | Mm.335076 | Olfr144       | Olfr144: Olfactory receptor 144                                          |
| 2.28 | 0.20 | Mm.30466  | Trps1         | Trichorhinophalangeal syndrome I (human)                                 |
| 2.28 | 0.24 | Mm.304287 | LOC382133     | Similar to RIKEN cDNA 1700029H17                                         |
| 2.27 | 0.09 | Mm.261453 | Ect2          | Ect2 oncogene                                                            |
| 2.27 | 0.17 | Mm.335587 | Trim44        | PREDICTED: Mus musculus hypothetical protein LOC (LOC546231)             |

|      |      |           |               |                                                                               |
|------|------|-----------|---------------|-------------------------------------------------------------------------------|
| 2.27 | 0.19 | Mm.211047 | Lrrc16        | Leucine rich repeat containing 16                                             |
| 2.27 | 0.20 | Mm.193025 | Tex13         | Testis expressed gene 13                                                      |
| 2.26 | 0.21 | Mm.89202  | Xcr1          | Chemokine (C motif) receptor 1                                                |
| 2.26 | 0.23 | Mm.5011   | Zfp37         | Zinc finger protein 37                                                        |
| 2.26 | 0.05 | Mm.222990 | Olfr1143      | Olfactory receptor 1143                                                       |
| 2.25 | 0.07 | Mm.255890 | Zic3          | Zinc finger protein of the cerebellum 3                                       |
| 2.25 | 0.20 | Mm.336400 | Sntg1         | Syntrophin, gamma 1                                                           |
| 2.25 | 0.07 | Mm.159422 | 4930505A04Rik | RIKEN cDNA 4930505A04 gene                                                    |
| 2.23 | 0.12 | Mm.286868 | Stxbp5        | MKIAA4253 protein                                                             |
| 2.23 | 0.18 | Mm.186778 | Slc16a10      | Solute carrier family 16 (monocarboxylic acid transporters), member 10        |
| 2.23 | 0.06 | Mm.257120 | Ripk5         | Ripk5: Receptor interacting protein kinase 5                                  |
| 2.23 | 0.15 | Mm.159704 | Abca6         | ATP-binding cassette, sub-family A (ABC1), member 6                           |
| 2.23 | 0.06 | Mm.131949 | Rshl3         | PREDICTED: similar to radial spokehead-like 1                                 |
| 2.22 | 0.18 | Mm.8655   | Cfh           | Complement component factor h                                                 |
| 2.22 | 0.16 | Mm.358972 | BC021442      | CDNA sequence BC021442                                                        |
| 2.22 | 0.22 | S71494    | not found     | SmD homolog                                                                   |
| 2.21 | 0.13 | Mm.325816 | Ppib          | Peptidylprolyl isomerase B                                                    |
| 2.20 | 0.16 | Mm.266260 | C030003D03Rik | RIKEN cDNA C030003D03 gene                                                    |
| 2.18 | 0.15 | Mm.259642 | 4933417K05Rik | Small nuclear ribonucleoprotein polypeptide F                                 |
| 2.17 | 0.07 | Mm.35670  | Abcc9         | ATP-binding cassette, sub-family C (CFTR/MRP), member 9, transcript variant 3 |
| 2.16 | 0.08 | Mm.100276 | Rdh6          | Retinol dehydrogenase 16                                                      |
| 2.15 | 0.11 | Mm.32118  | 2810021J22Rik | RIKEN cDNA 2810021J22 gene                                                    |
| 2.14 | 0.03 | Mm.185296 | 5430427O19Rik | PREDICTED: hypothetical protein LOC71398 [Mus musculus]                       |
| 2.14 | 0.02 | Mm.88790  | 1500010G04Rik | RIKEN cDNA 1500010G04 gene                                                    |
| 2.14 | 0.08 | Mm.233889 | Slc39a10      | Solute carrier family 39 (zinc transporter), member 10                        |
| 2.13 | 0.10 | Mm.281844 | AI788959      | UDP glucuronosyltransferase 2 family, polypeptide B34                         |

|      |      |           |               |                                                                                                |
|------|------|-----------|---------------|------------------------------------------------------------------------------------------------|
| 2.13 | 0.05 | Mm.42223  | Chic1         | Cysteine-rich hydrophobic 1 protein, partial                                                   |
| 2.13 | 0.03 | AK031317  | not found     | Mus musculus 13 days embryo male testis cDNA                                                   |
| 2.12 | 0.08 | Mm.133444 | 2310039E09Rik | RIKEN cDNA 2310039E09 gene                                                                     |
| 2.10 | 0.10 | Mm.224306 | Klhl13        | Kelch-like 13 (Drosophila)                                                                     |
| 2.10 | 0.07 | AK088928  | not found     | Mus musculus 2 days neonate thymus thymic cells cDNA                                           |
| 2.10 | 0.09 | Mm.101369 | Pik3cg        | Phosphatidylinositol 3-kinase gamma isoform                                                    |
| 2.09 | 0.04 | Mm.330366 | Olfr1082      | Olfactory receptor 1082                                                                        |
| 2.08 | 0.03 | Mm.24031  | 4933431N12Rik | MKIAA0882 protein                                                                              |
| 2.08 | 0.04 | Mm.252514 | Kcni1.2       | A-type potassium channel modulatory protein 1.2                                                |
| 2.06 | 0.04 | Mm.214755 | Pip           | Prolactin induced protein                                                                      |
| 2.06 | 0.01 | Mm.167471 | Adamts18      | A disintegrin-like and metallopeptidase (reprolysin type) with thrombospondin type 1 motif, 18 |

**Decreased (less than 0.5)**

|      |      |           |               |                                              |
|------|------|-----------|---------------|----------------------------------------------|
| 0.02 | 0.01 | Mm.22723  | Rpl23a        | Ribosomal protein L23a                       |
| 0.03 | 0.01 | Mm.22830  | Cryba1        | Crystallin, beta A1                          |
| 0.03 | 0.01 | Mm.22723  | Rpl23a        | Ribosomal protein L23a                       |
| 0.03 | 0.01 | AF093677  | not found     | Mus musculus ATPase subunit 6                |
| 0.03 | 0.01 | Mm.180003 | Rps27a        | Ribosomal protein S27a                       |
| 0.04 | 0.02 | Mm.279782 | Prdx5         | Peroxiredoxin 5                              |
| 0.04 | 0.01 | Mm.247113 | A230103N10Rik | Ribosomal protein L30                        |
| 0.04 | 0.01 | Mm.288567 | Hbb-b1        | Hemoglobin, beta adult major chain           |
| 0.04 | 0.02 | Mm.378879 | Actg1         | Actin, gamma, cytoplasmic 1                  |
| 0.04 | 0.02 | Mm.371577 | Rps17         | Ribosomal protein S17                        |
| 0.04 | 0.01 | AF378830  | not found     | Mus musculus cytochrome c oxidase subunit II |
| 0.04 | 0.02 | Mm.88212  | Tuba6         | Tubulin, alpha 6                             |
| 0.05 | 0.01 | Mm.354354 | 3100002L24Rik | Adult male kidney cDNA                       |
| 0.05 | 0.02 | AK008468  | not found     | Mus musculus adult male small intestine cDNA |

|      |      |           |               |                                                    |
|------|------|-----------|---------------|----------------------------------------------------|
| 0.05 | 0.02 | Mm.297482 | Tpt1          | Tumor protein, translationally-controlled 1        |
| 0.05 | 0.03 | Mm.261676 | Hist1h2bc     | Histone 1, H2bc                                    |
| 0.05 | 0.01 | Mm.371611 | Rps27         | Ribosomal protein S27                              |
| 0.05 | 0.03 | Mm.280038 | S100a11       | S100 calcium binding protein A11 (calizzarin)      |
| 0.05 | 0.02 | Mm.22723  | Rpl23a        | Ribosomal protein L23a                             |
| 0.05 | 0.02 | Mm.371577 | Rps17         | Ribosomal protein S17                              |
| 0.05 | 0.01 | Mm.354354 | 3100002L24Rik | Adult male kidney cDNA                             |
| 0.05 | 0.00 | Mm.288567 | Hbb-b1        | Hemoglobin, beta adult major chain                 |
| 0.05 | 0.02 | Mm.2965   | Rho           | Rhodopsin                                          |
| 0.06 | 0.02 | Mm.70666  | Eno1          | Enolase 1, alpha non-neuron                        |
| 0.06 | 0.02 | Mm.379103 | 1110017O22Rik | RIKEN cDNA 1110017O22 gene                         |
| 0.06 | 0.02 | Mm.354354 | 3100002L24Rik | Adult male kidney cDNA                             |
| 0.06 | 0.03 | Mm.244637 | Rpl9          | Ribosomal protein L9                               |
| 0.06 | 0.03 | Mm.282814 | Rpl24         | Ribosomal protein L24                              |
| 0.06 | 0.01 | Mm.343377 | Tuba2         | Tubulin, alpha 2                                   |
| 0.06 | 0.02 | Mm.297482 | Tpt1          | Tumor protein, translationally-controlled 1        |
| 0.06 | 0.04 | Mm.328846 | Rps2          | Phosphodiesterase 6A, cGMP-specific, rod, alpha    |
| 0.06 | 0.03 | Mm.379302 | Rpl31         | Ribosomal protein L31                              |
| 0.06 | 0.04 | Mm.142729 | Tmsb4x        | Thymosin, beta 4, X chromosome                     |
| 0.06 | 0.05 | Mm.2000   | Anapc13       | Anaphase promoting complex subunit 13              |
| 0.06 | 0.03 | Mm.335315 | Eef1a1        | Eukaryotic translation elongation factor 1 alpha 1 |
| 0.06 | 0.02 | Mm.2108   | Ttr           | Transthyretin                                      |
| 0.06 | 0.03 | Mm.930    | Ctsl          | Cathepsin L                                        |
| 0.06 | 0.02 | Mm.306548 | Rpl26         | Ribosomal protein L26                              |
| 0.06 | 0.02 | Mm.361382 | Rps4x         | Ribosomal protein S4, X-linked                     |
| 0.07 | 0.02 | Mm.322269 | Rps3a         | Ribosomal protein S3a                              |

|      |      |           |               |                                                                   |
|------|------|-----------|---------------|-------------------------------------------------------------------|
| 0.07 | 0.04 | Mm.371592 | Ubb           | Ubiquitin B                                                       |
| 0.07 | 0.06 | Mm.2344   | Gnb1          | Guanine nucleotide binding protein, beta 1                        |
| 0.07 | 0.01 | Mm.275810 | Rps10         | Ribosomal protein S10                                             |
| 0.07 | 0.05 | Mm.47709  | Pdc           | Phosducin                                                         |
| 0.07 | 0.01 | Mm.379371 | Aamp          | Angio-associated migratory protein                                |
| 0.07 | 0.04 | Mm.361382 | Rps4x         | Ribosomal protein S4, X-linked                                    |
| 0.07 | 0.03 | Mm.361382 | Rps4x         | Ribosomal protein S4, X-linked                                    |
| 0.07 | 0.02 | Mm.354354 | 3100002L24Rik | Adult male kidney cDNA                                            |
| 0.07 | 0.02 | Mm.306548 | Rpl26         | Ribosomal protein L26                                             |
| 0.07 | 0.03 | Mm.208004 | My16          | Myosin, light polypeptide 6, alkali, smooth muscle and non-muscle |
| 0.07 | 0.02 | Mm.275769 | 2310032F03Rik | RIKEN cDNA 2310032F03 gene                                        |
| 0.08 | 0.04 | Mm.290251 | Cnbp1         | Cellular nucleic acid binding protein 1                           |
| 0.08 | 0.04 | Mm.2469   | Shfdg1        | Split hand/foot deleted gene 1                                    |
| 0.08 | 0.03 | Mm.343377 | Tuba2         | Tubulin, alpha 2                                                  |
| 0.08 | 0.03 | Mm.43778  | Rps14         | Ribosomal protein S14                                             |
| 0.08 | 0.04 | Mm.306302 | LOC381438     | Ribosomal protein S23                                             |
| 0.08 | 0.05 | Mm.302971 | not found     | Adult male stomach cDNA                                           |
| 0.08 | 0.07 | Mm.250030 | Rpl12         | Ribosomal protein L12                                             |
| 0.08 | 0.03 | Mm.4419   | Rpl5          | Ribosomal protein L5                                              |
| 0.08 | 0.02 | Mm.378940 | Hmgn1         | High mobility group nucleosomal binding domain 1                  |
| 0.08 | 0.03 | Mm.361382 | Rps4x         | Ribosomal protein S4, X-linked                                    |
| 0.08 | 0.04 | Mm.181721 | Uqcrh         | Ubiquinol-cytochrome c reductase hinge protein                    |
| 0.08 | 0.02 | Mm.37214  | Trf           | Transferrin                                                       |
| 0.08 | 0.05 | Mm.46395  | Pzca          | Prostate stem cell antigen                                        |
| 0.08 | 0.04 | Mm.316362 | Rps11         | Ribosomal protein S11                                             |
| 0.08 | 0.03 | Mm.1228   | Cryaa         | Alpha-A-crystallin (Cryaa gene)                                   |

|      |      |           |               |                                                                                            |
|------|------|-----------|---------------|--------------------------------------------------------------------------------------------|
| 0.08 | 0.04 | Mm.29722  | Usmg5         | Upregulated during skeletal muscle growth 5                                                |
| 0.08 | 0.03 | Mm.100113 | Rpl10         | Ribosomal protein 10                                                                       |
| 0.08 | 0.02 | Mm.19355  | Rpl35a        | Ribosomal protein L35a                                                                     |
| 0.08 | 0.04 | Mm.181237 | Rnaset2       | Ribonuclease T2                                                                            |
| 0.08 | 0.02 | Mm.328846 | Rps2          | Phosphodiesterase 6A, cGMP-specific, rod, alpha                                            |
| 0.09 | 0.03 | Mm.284853 | Gnat1         | Guanine nucleotide binding protein, alpha transducing 1                                    |
| 0.09 | 0.03 | Mm.1776   | Fth1          | Ferritin heavy chain 1                                                                     |
| 0.09 | 0.03 | Mm.152627 | Cox7a2        | Cytochrome c oxidase, subunit VIIa 2                                                       |
| 0.09 | 0.04 | Mm.236868 | Rps3          | Ribosomal protein S3                                                                       |
| 0.09 | 0.02 | Mm.336743 | Hspa8         | Heat shock protein 8                                                                       |
| 0.09 | 0.04 | Mm.282053 | Rpl7          | Ribosomal protein L7                                                                       |
| 0.09 | 0.05 | Mm.378931 | Gsto1         | Glutathione S-transferase omega 1                                                          |
| 0.09 | 0.02 | Mm.22830  | Cryba1        | Crystallin, beta A1                                                                        |
| 0.09 | 0.06 | Mm.104368 | Rpl32         | Ribosomal protein L32                                                                      |
| 0.09 | 0.04 | Mm.372314 | Hspa1b        | Heat shock protein 1B                                                                      |
| 0.10 | 0.05 | Mm.378892 | Calm2         | Calmodulin 2                                                                               |
| 0.10 | 0.04 | Mm.319660 | Hmgn2         | High mobility group nucleosomal binding domain 2                                           |
| 0.10 | 0.03 | Mm.379129 | Eef1g         | Eukaryotic translation elongation factor 1 gamma                                           |
| 0.10 | 0.02 | Mm.34869  | Ndufa1        | NADH dehydrogenase (ubiquinone) 1 alpha subcomplex, 1                                      |
| 0.10 | 0.05 | Mm.379129 | Eef1g         | Eukaryotic translation elongation factor 1 gamma                                           |
| 0.10 | 0.06 | Mm.261676 | Hist1h2bc     | Histone 1, H2bc                                                                            |
| 0.10 | 0.05 | Mm.2966   | Atp5g3        | ATP synthase, H <sup>+</sup> transporting, mitochondrial F0 complex, subunit c (subunit 9) |
| 0.10 | 0.07 | Mm.5246   | Ppia          | Peptidylprolyl isomerase A                                                                 |
| 0.10 | 0.05 | Mm.4266   | Itm2b         | Integral membrane protein 2B                                                               |
| 0.10 | 0.05 | Mm.273339 | 4930583H14Rik | RIKEN cDNA 4930583H14 gene                                                                 |
| 0.10 | 0.05 | Mm.349863 | Nme2          | Expressed in non-metastatic cells 2, protein                                               |

|      |      |           |               |                                                                                               |
|------|------|-----------|---------------|-----------------------------------------------------------------------------------------------|
| 0.10 | 0.05 | Mm.371603 | Rps28         | Ribosomal protein S28                                                                         |
| 0.10 | 0.07 | Mm.277585 | App           | Amyloid beta (A4) precursor protein                                                           |
| 0.10 | 0.04 | Mm.38498  | Krt1-15       | Keratin complex 1, acidic, gene 15                                                            |
| 0.10 | 0.06 | Mm.277585 | App           | Amyloid beta (A4) precursor protein                                                           |
| 0.11 | 0.05 | Mm.29324  | Ldh1          | Lactate dehydrogenase 1, A chain                                                              |
| 0.11 | 0.05 | Mm.277092 | Heph          | Ribosomal protein L17                                                                         |
| 0.11 | 0.03 | Mm.157452 | Rps2          | Adult male lung cDNA, RIKEN full-length enriched library, clone:1200003H09 product            |
| 0.11 | 0.04 | Mm.1372   | Pde6b         | Phosphodiesterase 6B, cGMP, rod receptor, beta polypeptide                                    |
| 0.11 | 0.01 | Mm.218350 | Rpl19         | Ribosomal protein L19                                                                         |
| 0.11 | 0.05 | Mm.383994 | Krt2-6a       | Keratin complex 2, basic, gene 6a                                                             |
| 0.11 | 0.04 | Mm.2662   | Gsta4         | Glutathione S-transferase, alpha 4                                                            |
| 0.11 | 0.06 | Mm.371630 | 3110001N18Rik | Ribosomal protein L22 like 1                                                                  |
| 0.11 | 0.04 | AK012756  | not found     | Mus musculus 10, 11 days embryo whole body cDNA                                               |
| 0.11 | 0.04 | Mm.276137 | Atp5a1        | ATP synthase, H <sup>+</sup> transporting, mitochondrial F1 complex, alpha subunit, isoform 1 |
| 0.11 | 0.04 | Mm.284811 | Unc119        | Unc-119 homolog (C. elegans)                                                                  |
| 0.11 | 0.05 | Mm.372389 | Eno1          | Enolase 1, alpha non-neuron                                                                   |
| 0.11 | 0.05 | Mm.315997 | Hspca         | Heat shock protein 1, alpha                                                                   |
| 0.11 | 0.03 | Mm.288567 | Hbb-b1        | Hemoglobin, beta adult major chain                                                            |
| 0.11 | 0.07 | Mm.30478  | Rpl39         | Ribosomal protein L39                                                                         |
| 0.11 | 0.04 | Mm.336955 | Rpl10a        | Ribosomal protein L10A                                                                        |
| 0.11 | 0.03 | Mm.358617 | Krt2-6b       | Adult male tongue cDNA, RIKEN full-length enriched library, clone:2310008N03 product          |
| 0.11 | 0.07 | Mm.306880 | Lypdc2        | Ly6/Plaur domain containing 2                                                                 |
| 0.12 | 0.04 | Mm.383994 | Krt2-6a       | Keratin complex 2, basic, gene 6a                                                             |
| 0.12 | 0.04 | Mm.30039  | Prkar1a       | Protein kinase, cAMP dependent regulatory, type I, alpha                                      |
| 0.12 | 0.09 | Mm.193096 | Scd2          | Stearoyl-Coenzyme A desaturase 2                                                              |
| 0.12 | 0.05 | Mm.2180   | Hspcb         | Heat shock protein 1, beta                                                                    |



|      |      |           |          |                                                                                           |
|------|------|-----------|----------|-------------------------------------------------------------------------------------------|
| 0.12 | 0.06 | Mm.379005 | Rps18    | Ribosomal protein S18, transcript variant 1                                               |
| 0.12 | 0.07 | Mm.336205 | Pgk1     | Phosphoglycerate kinase 1                                                                 |
| 0.12 | 0.04 | Mm.246996 | Chchd1   | Coiled-coil-helix-coiled-coil-helix domain containing 1                                   |
| 0.12 | 0.07 | Mm.151562 | Rbp3     | Retinol binding protein 3, interstitial                                                   |
| 0.12 | 0.05 | Mm.186185 | Prdx6    | Peroxiredoxin 6                                                                           |
| 0.12 | 0.05 | Mm.589    | Gpi1     | Glucose phosphate isomerase 1                                                             |
| 0.12 | 0.05 | Mm.4263   | Cst3     | Cystatin C                                                                                |
| 0.12 | 0.07 | Mm.341719 | Rplp2    | Ribosomal protein, large P2                                                               |
| 0.12 | 0.05 | Mm.231395 | Ctsd     | Cathepsin D                                                                               |
| 0.12 | 0.05 | Mm.218350 | Rpl19    | Ribosomal protein L19                                                                     |
| 0.12 | 0.06 | Mm.100113 | Rpl10    | Ribosomal protein 10                                                                      |
| 0.12 | 0.04 | Mm.290251 | Cnbp1    | Cellular nucleic acid binding protein 1                                                   |
| 0.12 | 0.06 | Mm.368    | Psmb4    | Proteasome (prosome, macropain) subunit, beta type 4                                      |
| 0.12 | 0.05 | Mm.182962 | Eif3s5   | Eif3s5: Eukaryotic translation initiation factor 3, subunit 5 (epsilon)                   |
| 0.12 | 0.06 | Mm.328846 | Rps2     | Phosphodiesterase 6A, cGMP-specific, rod, alpha                                           |
| 0.13 | 0.08 | Mm.328846 | Rps2     | Phosphodiesterase 6A, cGMP-specific, rod, alpha                                           |
| 0.13 | 0.05 | Mm.238973 | Atp5b    | ATP synthase, H <sup>+</sup> transporting mitochondrial F1 complex, beta subunit          |
| 0.13 | 0.02 | Mm.34425  | Myh2     | Myosin, heavy polypeptide 2, skeletal muscle, adult                                       |
| 0.13 | 0.05 | Mm.368524 | Aldoa    | Aldolase 1, A isoform                                                                     |
| 0.13 | 0.08 | Mm.289431 | Eef2     | Eukaryotic translation elongation factor 2                                                |
| 0.13 | 0.07 | Mm.378885 | Atp5f1   | ATP synthase, H <sup>+</sup> transporting, mitochondrial F0 complex, subunit b, isoform 1 |
| 0.13 | 0.06 | Mm.13886  | Sui1-rs1 | Suppressor of initiator codon mutations, related sequence 1 ( <i>S. cerevisiae</i> )      |
| 0.13 | 0.04 | Mm.16224  | Guca1a   | Guanylate cyclase activator 1a (retina)                                                   |
| 0.13 | 0.04 | Mm.383993 | Krt2-5   | Keratin complex 2, basic, gene 5                                                          |
| 0.13 | 0.04 | Mm.31395  | Cpe      | Carboxypeptidase E                                                                        |
| 0.13 | 0.07 | Mm.261679 | Wwp2     | Ribosomal protein S26                                                                     |

|      |      |           |               |                                                                                  |
|------|------|-----------|---------------|----------------------------------------------------------------------------------|
| 0.13 | 0.05 | AK083524  | not found     | Mus musculus 9 days embryo whole body cDNA                                       |
| 0.13 | 0.05 | Mm.268000 | Vim           | Vimentin                                                                         |
| 0.13 | 0.07 | Mm.4257   | Aldh3a1       | Aldehyde dehydrogenase family 3, subfamily A1                                    |
| 0.13 | 0.04 | Mm.238973 | Atp5b         | ATP synthase, H <sup>+</sup> transporting mitochondrial F1 complex, beta subunit |
| 0.13 | 0.07 | Mm.371592 | Ubb           | Ubiquitin B                                                                      |
| 0.14 | 0.08 | Mm.383993 | Krt2-5        | Keratin complex 2, basic, gene 5                                                 |
| 0.14 | 0.05 | Mm.30270  | PsmA4         | Proteasome (prosome, macropain) subunit, alpha type 4                            |
| 0.14 | 0.04 | Mm.252497 | Kif1b         | Kinesin-like protein KIF1B                                                       |
| 0.14 | 0.09 | Mm.295670 | 1500016L11Rik | Chromatin modifying protein 2A                                                   |
| 0.14 | 0.06 | Mm.379003 | Rpl37a        | Ribosomal protein L37a                                                           |
| 0.14 | 0.07 | Mm.1186   | Car2          | Carbonic anhydrase 2                                                             |
| 0.14 | 0.03 | Mm.280083 | Rpl4          | Ribosomal protein L4                                                             |
| 0.14 | 0.10 | Mm.273339 | 4930583H14Rik | RIKEN cDNA 4930583H14 gene                                                       |
| 0.14 | 0.06 | Mm.338718 | Rps8          | Ribosomal protein S8                                                             |
| 0.14 | 0.10 | AK002956  | not found     | Mus musculus adult male brain cDNA                                               |
| 0.14 | 0.05 | Mm.3667   | Vtn           | Vitronectin                                                                      |
| 0.14 | 0.08 | Mm.371592 | Ubb           | Ubiquitin B                                                                      |
| 0.14 | 0.04 | Mm.6253   | Crygs         | Crystallin, gamma S                                                              |
| 0.14 | 0.08 | Mm.400    | Cox6b1        | Cytochrome c oxidase, subunit VIb polypeptide 1                                  |
| 0.14 | 0.09 | Mm.41926  | Ndufa4        | NADH dehydrogenase (ubiquinone) 1 alpha subcomplex, 4                            |
| 0.14 | 0.06 | Mm.298885 | Crygb         | Crystallin, gamma C                                                              |
| 0.14 | 0.02 | Mm.158903 | Hlf           | Hepatic leukemia factor                                                          |
| 0.14 | 0.06 | Mm.371552 | Cd63          | Cd63 antigen                                                                     |
| 0.14 | 0.06 | Mm.19987  | Dct           | Dopachrome tautomerase                                                           |
| 0.14 | 0.08 | Mm.246377 | Tubb2         | Tubulin, beta 2                                                                  |
| 0.14 | 0.02 | Mm.272389 | 2900010M23Rik | RIKEN cDNA 2900010M23 gene                                                       |

|      |      |           |               |                                                                                             |
|------|------|-----------|---------------|---------------------------------------------------------------------------------------------|
| 0.14 | 0.06 | Mm.17604  | Gnb5          | Guanine nucleotide binding protein, beta 5                                                  |
| 0.14 | 0.06 | Mm.32019  | Tcp1          | T-complex protein 1                                                                         |
| 0.14 | 0.05 | Mm.325307 | 1110032D12Rik | Transmembrane emp24 domain trafficking protein 2                                            |
| 0.14 | 0.04 | Mm.343377 | Tuba2         | Tubulin, alpha 2                                                                            |
| 0.14 | 0.08 | AK083524  | not found     | Mus musculus 9 days embryo whole body cDNA                                                  |
| 0.14 | 0.05 | Mm.371615 | Atp6v1g1      | G1 isoform of V-ATPase subunit                                                              |
| 0.14 | 0.06 | Mm.1372   | Pde6b         | Phosphodiesterase 6B, cGMP, rod receptor, beta polypeptide                                  |
| 0.14 | 0.03 | Mm.29324  | Ldh1          | Lactate dehydrogenase 1, A chain                                                            |
| 0.14 | 0.09 | Mm.273403 | Cox5a         | Cytochrome c oxidase, subunit Va                                                            |
| 0.14 | 0.02 | Mm.2180   | Hspcb         | Heat shock protein 1, beta                                                                  |
| 0.15 | 0.06 | Mm.1104   | Ube1x         | Ubiquitin-activating enzyme E1, Chr X                                                       |
| 0.15 | 0.07 | AK078038  | not found     | Mus musculus adult male medulla oblongata cDNA                                              |
| 0.15 | 0.10 | Mm.30071  | Laptm4a       | Lysosomal-associated protein transmembrane 4A                                               |
| 0.15 | 0.10 | AK002956  | not found     | Mus musculus adult male brain cDNA                                                          |
| 0.15 | 0.07 | Mm.1      | S100a10       | S100 calcium binding protein A10 (calpactin)                                                |
| 0.15 | 0.10 | Mm.3532   | Tmsb10        | Thymosin, beta 10                                                                           |
| 0.15 | 0.06 | Mm.277349 | Park7         | Parkinson disease (autosomal recessive, early onset) 7                                      |
| 0.15 | 0.04 | Mm.288567 | Hbb-b1        | Hemoglobin, beta adult major chain                                                          |
| 0.15 | 0.07 | Mm.17604  | Gnb5          | Guanine nucleotide binding protein, beta 5                                                  |
| 0.15 | 0.07 | Mm.234700 | Ywhae         | Tyrosine 3-monooxygenase/tryptophan 5-monooxygenase activation protein, epsilon polypeptide |
| 0.15 | 0.07 | Mm.371622 | Rpl11         | Ribosomal protein L11                                                                       |
| 0.15 | 0.07 | Mm.18590  | Tm4sf2        | Tetraspanin 7                                                                               |
| 0.15 | 0.06 | S55549    | not found     | cytoskeletal protein 49                                                                     |
| 0.15 | 0.06 | Mm.2409   | Adh1          | Alcohol dehydrogenase 1 (class I)                                                           |
| 0.15 | 0.05 | Mm.330525 | 2310003F16Rik | RIKEN cDNA 2310003F16 gene                                                                  |
| 0.15 | 0.09 | Mm.379007 | Rps6          | Ribosomal protein S6                                                                        |

|      |      |           |               |                                                         |
|------|------|-----------|---------------|---------------------------------------------------------|
| 0.15 | 0.08 | Mm.5023   | Pcp4          | Purkinje cell protein 4                                 |
| 0.15 | 0.06 | Mm.100144 | S100a6        | S100 calcium binding protein A6 (calyculin)             |
| 0.15 | 0.04 | Mm.200608 | Clu           | Clusterin                                               |
| 0.15 | 0.09 | Mm.253142 | Ndufs4        | NADH dehydrogenase (ubiquinone) Fe-S protein 4          |
| 0.15 | 0.05 | Mm.297486 | Rps25         | Ribosomal protein S25                                   |
| 0.15 | 0.06 | Mm.183043 | 2300003P22Rik | RIKEN cDNA 2300003P22 gene                              |
| 0.15 | 0.04 | Mm.1022   | Cdc42         | Cell division cycle 42 homolog ( <i>S. cerevisiae</i> ) |
| 0.15 | 0.06 | Mm.353923 | Rps12         | Ribosomal protein S12                                   |
| 0.15 | 0.09 | Mm.62876  | Zwint         | ZW10 interactor                                         |
| 0.15 | 0.07 | Mm.102496 | Ndfip1        | Nedd4 family interacting protein 1                      |
| 0.15 | 0.05 | Mm.27375  | Polr2k        | Polymerase (RNA) II (DNA directed) polypeptide K        |
| 0.15 | 0.07 | Mm.42805  | Ndufs5        | NADH dehydrogenase (ubiquinone) Fe-S protein 5          |
| 0.15 | 0.08 | Mm.180182 | Cox5b         | Cytochrome c oxidase, subunit Vb                        |
| 0.15 | 0.04 | Mm.379114 | Rpl15         | Ribosomal protein L15                                   |
| 0.16 | 0.08 | S67218    | not found     | transferrin                                             |
| 0.16 | 0.09 | Mm.33263  | H2-D1         | Histocompatibility 2, D region                          |
| 0.16 | 0.07 | Mm.371592 | Ubb           | Ubiquitin B                                             |
| 0.16 | 0.05 | Mm.3128   | Cox7c         | Cytochrome c oxidase, subunit VIIc                      |
| 0.16 | 0.08 | Mm.16756  | Si            | Silver                                                  |
| 0.16 | 0.07 | Mm.379133 | 2900073G15Rik | RIKEN cDNA 2900073G15 gene                              |
| 0.16 | 0.11 | Mm.375100 | 1810006K21Rik | RIKEN cDNA 1810006K21 gene                              |
| 0.16 | 0.07 | Mm.212703 | Mdh1          | Malate dehydrogenase 1                                  |
| 0.16 | 0.08 | Mm.4266   | Itm2b         | Integral membrane protein 2B                            |
| 0.16 | 0.07 | Mm.43415  | Cox6a1        | Cytochrome c oxidase, subunit VI a, polypeptide 1       |
| 0.16 | 0.04 | Mm.68889  | Gnb3          | Guanine nucleotide binding protein, beta 3              |
| 0.16 | 0.03 | Mm.316362 | Rps11         | Ribosomal protein S11                                   |

|      |      |           |               |                                                                           |
|------|------|-----------|---------------|---------------------------------------------------------------------------|
| 0.16 | 0.04 | Mm.371570 | Pabpc1        | Poly A binding protein, cytoplasmic 1                                     |
| 0.16 | 0.04 | AK083524  | not found     | Mus musculus 9 days embryo whole body cDNA, RIKEN                         |
| 0.16 | 0.07 | Mm.3918   | Abca4         | ATP-binding cassette, sub-family A (ABC1), member 4                       |
| 0.16 | 0.05 | Mm.5305   | Gnb2-rs1      | Guanine nucleotide binding protein (G protein), beta polypeptide 2 like 1 |
| 0.16 | 0.08 | Mm.39040  | Mal           | Myelin and lymphocyte protein, T-cell differentiation protein             |
| 0.16 | 0.06 | Mm.330075 | Rpl7a         | Ribosomal protein L7a                                                     |
| 0.16 | 0.11 | Mm.212606 | C330018J07Rik | RIKEN cDNA C330018J07 gene                                                |
| 0.16 | 0.10 | Mm.236868 | Rps3          | Ribosomal protein S3                                                      |
| 0.16 | 0.09 | Mm.643    | Rps15         | Ribosomal protein S15                                                     |
| 0.16 | 0.07 | Mm.18962  | Catna1        | Catenin (cadherin associated protein), alpha 1                            |
| 0.16 | 0.07 | Mm.140568 | 1100001I22Rik | RIKEN cDNA 1100001I22 gene                                                |
| 0.16 | 0.06 | Mm.3267   | Anxa8         | Annexin A8                                                                |
| 0.16 | 0.06 | Mm.216135 | Pkm2          | Pyruvate kinase, muscle                                                   |
| 0.16 | 0.09 | Mm.99996  | Kif1c         | Kinesin family member 1C                                                  |
| 0.16 | 0.08 | Mm.643    | Rps15         | Ribosomal protein S15                                                     |
| 0.16 | 0.12 | Mm.44101  | Atp1a3        | ATPase, Na <sup>+</sup> /K <sup>+</sup> transporting, alpha 3 polypeptide |
| 0.16 | 0.07 | Mm.3913   | Eno2          | Enolase 2, gamma neuronal                                                 |
| 0.17 | 0.07 | Mm.29959  | 1600029D21Rik | RIKEN cDNA 1600029D21 gene                                                |
| 0.17 | 0.07 | Mm.16716  | Lamp1         | Lysosomal membrane glycoprotein 1                                         |
| 0.17 | 0.07 | Mm.246304 | Sypl          | Synaptophysin-like protein                                                |
| 0.17 | 0.03 | Mm.280083 | Rpl4          | Ribosomal protein L4                                                      |
| 0.17 | 0.12 | Mm.156506 | Pcdh21        | Protocadherin 21                                                          |
| 0.17 | 0.08 | Mm.41653  | Rlbp1         | Retinaldehyde binding protein 1                                           |
| 0.17 | 0.05 | Mm.329700 | Gng3          | Guanine nucleotide binding protein (G protein), gamma 3 subunit           |
| 0.17 | 0.04 | Mm.379061 | Timm8b        | Translocase of inner mitochondrial membrane 8 homolog b (yeast)           |
| 0.17 | 0.08 | Mm.330075 | Rpl7a         | Ribosomal protein L7a                                                     |

|      |      |           |               |                                                                                                       |
|------|------|-----------|---------------|-------------------------------------------------------------------------------------------------------|
| 0.17 | 0.03 | Mm.331    | Ubc           | Ubiquitin C                                                                                           |
| 0.17 | 0.04 | Mm.260288 | Ppp2ca        | Protein phosphatase 2a, catalytic subunit, alpha isoform                                              |
| 0.17 | 0.06 | Mm.41603  | 1810006K23Rik | CaMKII inhibitor protein alpha                                                                        |
| 0.17 | 0.09 | Mm.6250   | Prom1         | Prominin 1                                                                                            |
| 0.17 | 0.06 | Mm.10314  | Atp5g2        | ATP synthase, H <sup>+</sup> transporting, mitochondrial F0 complex, subunit c (subunit 9), isoform 2 |
| 0.17 | 0.12 | Mm.289431 | Eef2          | Eukaryotic translation elongation factor 2                                                            |
| 0.17 | 0.11 | Mm.315189 | H3f3a         | H3 histone, family 3A                                                                                 |
| 0.17 | 0.04 | Mm.274995 | Snrpn         | Small nuclear ribonucleoprotein N                                                                     |
| 0.17 | 0.08 | Mm.238343 | Anxa2         | Annexin A2                                                                                            |
| 0.17 | 0.09 | Mm.231395 | Ctsd          | Cathepsin D                                                                                           |
| 0.17 | 0.05 | Mm.332336 | 9130413I22Rik | Morf4 family associated protein 1                                                                     |
| 0.17 | 0.03 | Mm.289810 | Rpl14         | Ribosomal protein L14                                                                                 |
| 0.17 | 0.13 | Mm.332810 | Gpx4          | Glutathione peroxidase 4                                                                              |
| 0.17 | 0.07 | Mm.236513 | Map3k12       | Mitogen activated protein kinase kinase kinase 12                                                     |
| 0.17 | 0.04 | Mm.451    | Akr1b3        | Aldo-keto reductase family 1, member B3 (aldose reductase)                                            |
| 0.17 | 0.08 | M20632    | not found     | Mouse LLRep3 protein                                                                                  |
| 0.18 | 0.11 | Mm.379372 | 4930542G03Rik | RIKEN cDNA 4930542G03 gene                                                                            |
| 0.18 | 0.02 | Mm.261679 | Wwp2          | Ribosomal protein S26                                                                                 |
| 0.18 | 0.09 | X67140    | not found     | M.musculus mRNA for SR calcium ATPase                                                                 |
| 0.18 | 0.05 | Mm.248615 | Lgals3        | Lectin, galactose binding, soluble 3                                                                  |
| 0.18 | 0.06 | Mm.1948   | Tctex1        | T-complex testis expressed 1                                                                          |
| 0.18 | 0.09 | Mm.297096 | Mdh2          | Malate dehydrogenase 2, NAD (mitochondrial)                                                           |
| 0.18 | 0.10 | Mm.330075 | Rpl7a         | Ribosomal protein L7a                                                                                 |
| 0.18 | 0.12 | Mm.181237 | Rnaset2       | Ribonuclease T2                                                                                       |
| 0.18 | 0.07 | Mm.272253 | 1500034J20Rik | IMP1 inner mitochondrial membrane peptidase-like ( <i>S. cerevisiae</i> )                             |
| 0.18 | 0.05 | Mm.271950 | Gorasp2       | Golgi reassembly stacking protein 2                                                                   |

|      |      |           |           |                                                                    |
|------|------|-----------|-----------|--------------------------------------------------------------------|
| 0.18 | 0.07 | Mm.2206   | Ndufv2    | NADH dehydrogenase (ubiquinone) flavoprotein 2                     |
| 0.18 | 0.06 | Mm.209385 | Lpp       | Mortality factor 4 like 1                                          |
| 0.18 | 0.10 | Mm.158264 | Pfdn5     | Prefoldin 5, transcript variant 2                                  |
| 0.18 | 0.07 | Mm.35016  | H2-T23    | Histocompatibility 2, T region locus 23                            |
| 0.18 | 0.09 | Mm.4266   | Itm2b     | Integral membrane protein 2B                                       |
| 0.18 | 0.07 | Mm.289431 | Eef2      | Eukaryotic translation elongation factor 2                         |
| 0.18 | 0.10 | Mm.14455  | Tgfb1     | Transforming growth factor, beta induced                           |
| 0.18 | 0.09 | Mm.87773  | Tra1      | Tumor rejection antigen gp96                                       |
| 0.18 | 0.09 | S74315    | not found | gag=antigen LEC-A                                                  |
| 0.18 | 0.06 | Mm.331    | Ubc       | Ubiquitin C                                                        |
| 0.18 | 0.04 | Mm.210745 | Glul      | Glutamine synthetase                                               |
| 0.18 | 0.10 | Mm.589    | Gpi1      | Glucose phosphate isomerase 1                                      |
| 0.18 | 0.10 | Mm.1850   | Uqcrb     | Fc receptor-like mucin-like 1                                      |
| 0.18 | 0.08 | Mm.273277 | Trim29    | Tripartite motif protein 29                                        |
| 0.18 | 0.14 | Mm.353923 | Rps12     | Ribosomal protein S12                                              |
| 0.18 | 0.05 | NM_134104 | not found | not found                                                          |
| 0.18 | 0.07 | Mm.124176 | Limk2     | LIM motif-containing protein kinase 2                              |
| 0.18 | 0.04 | Mm.316179 | Ftl1      | Ferritin light chain 1                                             |
| 0.18 | 0.07 | Mm.2319   | Stmn3     | Stathmin-like 3                                                    |
| 0.18 | 0.02 | Mm.14526  | Mylpf     | Myosin light chain, phosphorylatable, fast skeletal muscle         |
| 0.18 | 0.11 | Mm.21961  | Atp6ap1   | ATPase, H <sup>+</sup> transporting, lysosomal accessory protein 1 |
| 0.18 | 0.07 | Mm.252063 | Mbp       | Myelin basic protein, transcript variant 2                         |
| 0.18 | 0.03 | Mm.95707  | Aipl1     | Aryl hydrocarbon receptor-interacting protein-like 1               |
| 0.18 | 0.05 | Mm.347492 | Rom1      | Rod outer segment membrane protein 1                               |
| 0.18 | 0.13 | Mm.290622 | Pde6h     | Phosphodiesterase 6H, cGMP-specific, cone, gamma                   |
| 0.18 | 0.09 | Mm.16831  | Ckb       | Creatine kinase, brain                                             |

|      |      |           |               |                                                                                  |
|------|------|-----------|---------------|----------------------------------------------------------------------------------|
| 0.18 | 0.01 | Mm.235863 | Rcvrn         | Recoverin                                                                        |
| 0.18 | 0.08 | Mm.340163 | Myh8          | Myosin, heavy polypeptide 4, skeletal muscle                                     |
| 0.19 | 0.15 | Mm.279821 | Eif4a1        | Eukaryotic translation initiation factor 4A1                                     |
| 0.19 | 0.04 | Mm.277585 | App           | Amyloid beta (A4) precursor protein                                              |
| 0.19 | 0.08 | Mm.340658 | Rpl27         | Ribosomal protein L27                                                            |
| 0.19 | 0.08 | Mm.275937 | Bfsp1         | Beaded filament structural protein in lens-CP94                                  |
| 0.19 | 0.07 | Mm.339491 | Rpl41         | Ribosomal protein L41                                                            |
| 0.19 | 0.08 | Mm.27630  | Slurp1        | Secreted Ly6/Plaur domain containing 1                                           |
| 0.19 | 0.11 | Mm.88212  | Tuba6         | Tubulin, alpha 6                                                                 |
| 0.19 | 0.11 | Mm.325350 | Slc37a2       | Solute carrier family 37 (glycerol-3-phosphate transporter), member 2            |
| 0.19 | 0.07 | Mm.298    | Slc25a3       | Solute carrier family 25 (mitochondrial carrier, phosphate carrier), member 3    |
| 0.19 | 0.05 | Mm.359377 | Rpl29         | Ribosomal protein L29                                                            |
| 0.19 | 0.06 | Mm.136093 | Atp5k         | ATP synthase, H <sup>+</sup> transporting, mitochondrial F1F0 complex, subunit e |
| 0.19 | 0.16 | Mm.44101  | Atp1a3        | ATPase, Na <sup>+</sup> /K <sup>+</sup> transporting, alpha 3 polypeptide        |
| 0.19 | 0.08 | Mm.273277 | Trim29        | Tripartite motif protein 29                                                      |
| 0.19 | 0.11 | Mm.379457 | Vcp           | Valosin containing protein                                                       |
| 0.19 | 0.06 | Mm.16756  | Si            | Silver                                                                           |
| 0.19 | 0.03 | Mm.132535 | MGC68323      | Glyceraldehyde-3-phosphate dehydrogenase (phosphorylating)-like                  |
| 0.19 | 0.12 | Mm.298885 | Crygb         | Crystallin, gamma C                                                              |
| 0.19 | 0.07 | Mm.315997 | Hspca         | Heat shock protein 1, alpha                                                      |
| 0.19 | 0.10 | Mm.274373 | Rdh12         | Retinol dehydrogenase 12                                                         |
| 0.19 | 0.09 | Mm.20460  | Rgr           | Retinal G protein coupled receptor                                               |
| 0.19 | 0.04 | Mm.332810 | Gpx4          | Glutathione peroxidase 4                                                         |
| 0.19 | 0.07 | Mm.294457 | 2310047H23Rik | RIKEN cDNA 2310047H23 gene                                                       |
| 0.19 | 0.14 | Mm.44101  | Atp1a3        | ATPase, Na <sup>+</sup> /K <sup>+</sup> transporting, alpha 3 polypeptide        |
| 0.19 | 0.11 | Mm.29264  | Sla2          | RIKEN cDNA 1110008F13 gene                                                       |



|      |      |           |               |                                                                                |
|------|------|-----------|---------------|--------------------------------------------------------------------------------|
| 0.19 | 0.05 | Mm.424    | Atp1b3        | ATPase, Na <sup>+</sup> /K <sup>+</sup> transporting, beta 3 polypeptide       |
| 0.19 | 0.02 | Mm.158264 | Pfdn5         | Prefoldin 5, transcript variant 2                                              |
| 0.20 | 0.12 | Mm.182042 | Atp5h         | ATP synthase, H <sup>+</sup> transporting, mitochondrial F0 complex, subunit d |
| 0.20 | 0.08 | Mm.315189 | H3f3a         | H3 histone, family 3A                                                          |
| 0.20 | 0.06 | Mm.290353 | 1810045K07Rik | Transmembrane protein 66                                                       |
| 0.20 | 0.09 | Mm.55143  | Dkk3          | Dickkopf homolog 3 ( <i>Xenopus laevis</i> )                                   |
| 0.20 | 0.05 | Mm.286408 | Rpl36a        | Ribosomal protein L36a                                                         |
| 0.20 | 0.11 | Mm.726    | Bsg           | Basigin                                                                        |
| 0.20 | 0.07 | Mm.153758 | Tceb2         | Transcription elongation factor B (SIII), polypeptide 2                        |
| 0.20 | 0.10 | Mm.175661 | Ifitm1        | Interferon induced transmembrane protein 1                                     |
| 0.20 | 0.12 | Mm.331185 | S100a16       | S100 calcium binding protein A16                                               |
| 0.20 | 0.06 | Mm.9257   | D10Wsu52e     | D10Wsu52e                                                                      |
| 0.20 | 0.09 | Mm.273277 | Trim29        | Tripartite motif protein 29                                                    |
| 0.20 | 0.08 | Mm.2180   | Hspcb         | Heat shock protein 1, beta                                                     |
| 0.20 | 0.07 | Mm.2344   | Gnb1          | Guanine nucleotide binding protein, beta 1                                     |
| 0.20 | 0.14 | Mm.34002  | 2410015M20Rik | RIKEN cDNA 2410015M20 gene                                                     |
| 0.20 | 0.02 | AF303453  | not found     | Mus musculus endogenous virus intracisternal A-particle clone T-25-1           |
| 0.20 | 0.09 | Mm.358643 | Tnnt1         | Troponin T1, skeletal, slow                                                    |
| 0.20 | 0.10 | Mm.38496  | Cspg5         | Chondroitin sulfate proteoglycan 5                                             |
| 0.20 | 0.03 | Mm.39469  | Tnni2         | Troponin I, skeletal, fast 2                                                   |
| 0.20 | 0.08 | Mm.325307 | 1110032D12Rik | Transmembrane emp24 domain trafficking protein 2                               |
| 0.20 | 0.10 | Mm.32019  | Tcp1          | T-complex protein 1                                                            |
| 0.20 | 0.04 | Mm.345333 | Rpl35         | Ribosomal protein L35                                                          |
| 0.20 | 0.11 | Mm.290692 | Tkt           | Transketolase                                                                  |
| 0.20 | 0.08 | Mm.379043 | Nsep1         | Y box protein 1                                                                |
| 0.20 | 0.09 | Mm.156124 | Slc24a1       | Solute carrier family 24 (sodium/potassium/calcium exchanger), member 1        |

|      |      |           |               |                                                          |
|------|------|-----------|---------------|----------------------------------------------------------|
| 0.20 | 0.03 | Mm.378957 | Stmn1         | Stathmin 1                                               |
| 0.20 | 0.16 | Mm.379372 | 4930542G03Rik | RIKEN cDNA 4930542G03 gene                               |
| 0.20 | 0.08 | Mm.18590  | Tm4sf2        | Tetraspanin 7                                            |
| 0.20 | 0.13 | Mm.1458   | Pps           | Putative phosphatase                                     |
| 0.20 | 0.05 | Mm.3746   | Naca          | Nascent polypeptide-associated complex alpha polypeptide |
| 0.20 | 0.05 | Mm.143818 | Psmb7         | Proteasome (prosome, macropain) subunit, beta type 7     |
| 0.20 | 0.06 | Mm.196605 | Hk1           | Hexokinase 1                                             |
| 0.20 | 0.09 | Mm.353923 | Rps12         | Ribosomal protein S12                                    |
| 0.20 | 0.11 | Mm.233470 | Igfbp7        | Insulin-like growth factor binding protein 7             |
| 0.21 | 0.08 | Mm.282039 | Acly          | ATP citrate lyase                                        |
| 0.21 | 0.10 | Mm.379025 | Tbca          | Tubulin cofactor a                                       |
| 0.21 | 0.03 | Mm.1860   | Pitpnm1       | Phosphatidylinositol membrane-associated 1               |
| 0.21 | 0.08 | Mm.123110 | Spnb2         | Spectrin beta 2                                          |
| 0.21 | 0.07 | Mm.4646   | Krt1-13       | Keratin complex 1, acidic, gene 13                       |
| 0.21 | 0.09 | Mm.372389 | Eno1          | Enolase 1, alpha non-neuron                              |
| 0.21 | 0.07 | Mm.335403 | Bfsp2         | Beaded filament structural protein 2, phakinin           |
| 0.21 | 0.02 | Mm.178    | Cryab         | Crystallin, alpha B                                      |
| 0.21 | 0.07 | Mm.13849  | Hspb1         | Heat shock protein 1                                     |
| 0.21 | 0.05 | Mm.74605  | Faim          | Fas-apoptosis inhibitory molecule                        |
| 0.21 | 0.07 | Mm.200608 | Clu           | Clusterin                                                |
| 0.21 | 0.10 | Mm.282814 | Rpl24         | Ribosomal protein L24                                    |
| 0.21 | 0.13 | Mm.349277 | Rpl18         | Ribosomal protein L18                                    |
| 0.21 | 0.07 | Mm.197728 | Cox7b         | Cytochrome c oxidase subunit VIIb                        |
| 0.21 | 0.10 | Mm.378942 | Hnrpk         | Heterogeneous nuclear ribonucleoprotein K                |
| 0.21 | 0.10 | Mm.300697 | 2310008M10Rik | RIKEN cDNA 2310008M10 gene                               |
| 0.21 | 0.05 | Mm.158264 | Pfdn5         | Prefoldin 5, transcript variant 2                        |

|      |      |           |               |                                                                   |
|------|------|-----------|---------------|-------------------------------------------------------------------|
| 0.21 | 0.09 | Mm.153891 | Ptp4a3        | Protein tyrosine phosphatase 4a3                                  |
| 0.21 | 0.11 | Mm.88212  | Tuba6         | Tubulin, alpha 6                                                  |
| 0.21 | 0.03 | Mm.3918   | Abca4         | ATP-binding cassette, sub-family A (ABC1)                         |
| 0.21 | 0.01 | Mm.1061   | Fdx1          | Ferredoxin 1                                                      |
| 0.21 | 0.09 | Mm.143818 | Psmb7         | Proteasome (prosome, macropain) subunit, beta type 7              |
| 0.21 | 0.08 | Mm.313236 | 5730427N09Rik | RIKEN cDNA 5730427N09 gene                                        |
| 0.22 | 0.04 | Mm.128733 | D0H4S114      | DNA segment, human D4S114                                         |
| 0.22 | 0.05 | Mm.221452 | Ranbp5        | RAN binding protein 5, mRNA                                       |
| 0.22 | 0.13 | Mm.262021 | Rpl6          | Ribosomal protein L6                                              |
| 0.22 | 0.13 | Mm.18590  | Tm4sf2        | Tetraspanin 7                                                     |
| 0.22 | 0.11 | Mm.246996 | Chchd1        | Coiled-coil-helix-coiled-coil-helix domain containing 1           |
| 0.22 | 0.06 | Mm.2261   | Psmd4         | Proteasome (prosome, macropain) 26S subunit, non-ATPase, 4        |
| 0.22 | 0.06 | Mm.30066  | Rpl8          | Ribosomal protein L8                                              |
| 0.22 | 0.13 | Mm.316179 | Ftl1          | Ferritin light chain 1                                            |
| 0.22 | 0.11 | Mm.273277 | Trim29        | Tripartite motif protein 29                                       |
| 0.22 | 0.03 | Mm.379033 | Tsg101        | Tumor susceptibility gene 101                                     |
| 0.22 | 0.03 | Mm.683    | not found     | Ornithine decarboxylase antizyme                                  |
| 0.22 | 0.12 | Mm.379152 | Eif3s3        | Eukaryotic translation initiation factor 3, subunit 3 (gamma)     |
| 0.22 | 0.07 | Mm.512    | Wbp5          | WW domain binding protein 5                                       |
| 0.22 | 0.05 | Mm.6994   | Hadh2         | Hydroxyacyl-Coenzyme A dehydrogenase type II                      |
| 0.22 | 0.13 | Mm.299062 | Chchd2        | Coiled-coil-helix-coiled-coil-helix domain containing 2           |
| 0.22 | 0.08 | Mm.315962 | Pgam1         | Phosphoglycerate mutase 1                                         |
| 0.22 | 0.13 | Mm.6698   | Sara1         | SAR1a gene homolog 1 ( <i>S. cerevisiae</i> )                     |
| 0.22 | 0.08 | Mm.279861 | 1810060D16Rik | Polymerase (RNA) II (DNA directed) polypeptide F                  |
| 0.22 | 0.05 | Mm.379006 | Rps29         | Ribosomal protein S29                                             |
| 0.22 | 0.04 | Mm.161414 | Gluld1        | Glutamate-ammonia ligase (glutamine synthase) domain containing 1 |

|      |      |           |               |                                                                            |
|------|------|-----------|---------------|----------------------------------------------------------------------------|
| 0.22 | 0.10 | Mm.171123 | Gng13         | Guanine nucleotide binding protein 13, gamma                               |
| 0.22 | 0.08 | Mm.1228   | Cryaa         | Alpha-A-crystallin                                                         |
| 0.22 | 0.17 | Mm.328846 | Rps2          | Phosphodiesterase 6A, cGMP-specific, rod, alpha                            |
| 0.22 | 0.09 | Mm.622    | Supt4h1       | Suppressor of Ty 4 homolog 1 (S. cerevisiae)                               |
| 0.22 | 0.06 | Mm.262327 | Vdac2         | Voltage-dependent anion channel 2                                          |
| 0.22 | 0.08 | Mm.32912  | Psmb1         | Proteasome (prosome, macropain) subunit, beta type 1                       |
| 0.22 | 0.08 | Mm.289669 | Rps21         | Ribosomal protein S21                                                      |
| 0.22 | 0.04 | Mm.27886  | 2410011G03Rik | NADH dehydrogenase (ubiquinone) 1 alpha subcomplex, 12                     |
| 0.22 | 0.04 | Mm.17964  | Khdrbs3       | KH domain containing, RNA binding, signal transduction associated 3        |
| 0.22 | 0.13 | Mm.125770 | Gnas          | GNAS (guanine nucleotide binding protein, alpha stimulating) complex locus |
| 0.22 | 0.06 | Mm.29590  | Idh3b         | Isocitrate dehydrogenase 3 (NAD+) beta                                     |
| 0.22 | 0.14 | Mm.3820   | Cmas          | Cytidine monophospho-N-acetylneuraminic acid synthetase                    |
| 0.22 | 0.08 | Mm.238973 | Atp5b         | ATP synthase, H+ transporting mitochondrial F1 complex, beta subunit       |
| 0.23 | 0.15 | Mm.28209  | Perp          | PERP, TP53 apoptosis effector                                              |
| 0.23 | 0.11 | Mm.75713  | 2310043J07Rik | RIKEN cDNA 2310043J07 gene                                                 |
| 0.23 | 0.09 | Mm.30071  | Laptm4a       | Lysosomal-associated protein transmembrane 4A                              |
| 0.23 | 0.01 | Mm.29714  | 1200009C21Rik | Eukaryotic translation initiation factor 3, subunit 12                     |
| 0.23 | 0.08 | AK083524  | not found     | Mus musculus 9 days embryo whole body cDNA                                 |
| 0.23 | 0.14 | Mm.87773  | Tra1          | Tumor rejection antigen gp96                                               |
| 0.23 | 0.06 | Mm.4222   | Tpi1          | Triosephosphate isomerase 1                                                |
| 0.23 | 0.04 | Mm.379057 | Rpl3          | Ribosomal protein L3                                                       |
| 0.23 | 0.06 | Mm.451    | Akr1b3        | Aldo-keto reductase family 1                                               |
| 0.23 | 0.14 | Mm.126043 | Bat1a         | HLA-B-associated transcript 1A                                             |
| 0.23 | 0.05 | Mm.28144  | 0610007C21Rik | RIKEN cDNA 0610007C21 gene                                                 |
| 0.23 | 0.07 | Mm.289431 | Eef2          | Eukaryotic translation elongation factor 2                                 |
| 0.23 | 0.14 | Mm.30181  | Map17         | PDZK1 interacting protein 1                                                |

|      |      |           |               |                                                                               |
|------|------|-----------|---------------|-------------------------------------------------------------------------------|
| 0.23 | 0.07 | Mm.377071 | Mrps33        | Mitochondrial ribosomal protein S33, transcript variant 2                     |
| 0.23 | 0.14 | Mm.18590  | Tm4sf2        | Tetraspanin 7                                                                 |
| 0.23 | 0.12 | Mm.220204 | Osbpl8        | Oxysterol binding protein-like 8, transcript variant 2                        |
| 0.23 | 0.10 | Mm.16106  | C4            | Complement component 4                                                        |
| 0.23 | 0.12 | Mm.10530  | Acadm         | Acetyl-Coenzyme A dehydrogenase, medium chain                                 |
| 0.23 | 0.12 | Mm.272264 | Stx3          | Syntaxin 3, transcript variant C                                              |
| 0.23 | 0.11 | Mm.258204 | Nsep1         | Mus musculus similar to nuclease sensitive element binding protein 1          |
| 0.23 | 0.08 | Mm.371622 | Rpl11         | Ribosomal protein L11                                                         |
| 0.23 | 0.06 | Mm.315430 | 2610524G07Rik | RIKEN cDNA 2610524G07 gene                                                    |
| 0.23 | 0.09 | Mm.182785 | Emp1          | Epithelial membrane protein 1                                                 |
| 0.23 | 0.05 | Mm.252497 | Kif1b         | Kinesin-like protein KIF1B                                                    |
| 0.23 | 0.13 | Mm.30113  | Ndufs3        | NADH dehydrogenase (ubiquinone) Fe-S protein 3                                |
| 0.24 | 0.12 | Mm.544    | Pea15         | Phosphoprotein enriched in astrocytes 15                                      |
| 0.24 | 0.10 | Mm.6375   | Gyg1          | Glycogenin 1                                                                  |
| 0.24 | 0.11 | Mm.272361 | Psmc5         | Protease (prosome, macropain) 26S subunit, ATPase 5, mRNA                     |
| 0.24 | 0.13 | Mm.121265 | Psmal1        | Psmal1: Proteasome (prosome, macropain) subunit, alpha type 1,                |
| 0.24 | 0.10 | Mm.40989  | Habp4         | Hyaluronic acid binding protein 4                                             |
| 0.24 | 0.15 | Mm.90151  | Akr1b7        | Aldo-keto reductase family 1, member B7                                       |
| 0.24 | 0.12 | Mm.38055  | Esd           | Esterase D/formylglutathione hydrolase                                        |
| 0.24 | 0.07 | Mm.16756  | Si            | Silver                                                                        |
| 0.24 | 0.14 | Mm.30929  | Prdx1         | Peroxiredoxin 1                                                               |
| 0.24 | 0.10 | Mm.249986 | 2410016F01Rik | Ring finger protein 187                                                       |
| 0.24 | 0.07 | Mm.10433  | Aip           | Aryl-hydrocarbon receptor-interacting protein                                 |
| 0.24 | 0.05 | Mm.272629 | Usp8          | Ubiquitin specific peptidase 8                                                |
| 0.24 | 0.08 | Mm.24636  | Pop5          | Processing of precursor 5, ribonuclease P/MRP family ( <i>S. cerevisiae</i> ) |
| 0.24 | 0.05 | Mm.177990 | Phpt1         | Phosphohistidine phosphatase 1                                                |

|      |      |           |               |                                                                                          |
|------|------|-----------|---------------|------------------------------------------------------------------------------------------|
| 0.24 | 0.06 | Mm.379372 | 4930542G03Rik | RIKEN cDNA 4930542G03 gene                                                               |
| 0.24 | 0.10 | Mm.282158 | Cct5          | Chaperonin subunit 5 (epsilon)                                                           |
| 0.24 | 0.10 | Mm.378946 | Eif3s6        | Eukaryotic translation initiation factor 3, subunit 6                                    |
| 0.24 | 0.12 | Mm.26633  | Plekhb1       | Pleckstrin homology domain containing, family B (evectins) member 1                      |
| 0.24 | 0.09 | Mm.275413 | Tdrd7         | Tudor domain containing 7                                                                |
| 0.24 | 0.12 | Mm.5291   | Rps5          | Ribosomal protein S5                                                                     |
| 0.24 | 0.10 | Mm.276042 | Actn4         | Actinin alpha 4                                                                          |
| 0.24 | 0.14 | Mm.33263  | H2-D1         | Histocompatibility 2, D region                                                           |
| 0.24 | 0.03 | Mm.290774 | not found     | MRNA fragment for heat shock cognate hsc73                                               |
| 0.24 | 0.11 | Mm.28147  | Dp111         | Deleted in polyposis 1-like 1                                                            |
| 0.24 | 0.06 | Mm.86322  | Tacc2         | Transforming, acidic coiled-coil containing protein 2                                    |
| 0.24 | 0.12 | Mm.33263  | H2-D1         | Histocompatibility 2, D region                                                           |
| 0.24 | 0.08 | Mm.243234 | Psm2          | Proteasome (prosome, macropain) 26S subunit, non-ATPase, 2                               |
| 0.24 | 0.07 | Mm.1225   | Col17a1       | Procollagen, type XVII, alpha 1                                                          |
| 0.24 | 0.18 | Mm.222680 | Rgs9bp        | Regulator of G-protein signalling 9 binding protein                                      |
| 0.24 | 0.11 | Mm.373613 | Mpp4          | Membrane protein, palmitoylated 4 (MAGUK p55 subfamily member 4)                         |
| 0.24 | 0.07 | Mm.330160 | Hspa5         | Heat shock 70kD protein 5 (glucose-regulated protein)                                    |
| 0.24 | 0.04 | Mm.214950 | Acta1         | Actin, alpha 1, skeletal muscle                                                          |
| 0.24 | 0.09 | Mm.1451   | Mfge8         | Milk fat globule-EGF factor 8 protein                                                    |
| 0.24 | 0.05 | Mm.276381 | Tnpo3         | MKIAA4133 protein                                                                        |
| 0.24 | 0.09 | Mm.372389 | Eno1          | Enolase 1, alpha non-neuron                                                              |
| 0.25 | 0.11 | Mm.273538 | Tubb5         | Tubulin, beta 5                                                                          |
| 0.25 | 0.16 | Mm.379044 | Ywhaz         | Tyrosine 3-monooxygenase/tryptophan 5-monooxygenase activation protein, zeta polypeptide |
| 0.25 | 0.08 | Mm.306026 | Epb4.112      | 4.1G protein (Epb4.112 gene) splice variant                                              |
| 0.25 | 0.16 | Mm.2785   | Dbi           | Diazepam binding inhibitor                                                               |
| 0.25 | 0.09 | AK019927  | not found     | not found                                                                                |

|      |      |           |               |                                                          |
|------|------|-----------|---------------|----------------------------------------------------------|
| 0.25 | 0.11 | Mm.379457 | Vcp           | Valosin containing protein                               |
| 0.25 | 0.17 | Mm.3555   | Vdac1         | Voltage-dependent anion channel 1                        |
| 0.25 | 0.13 | Mm.45580  | Aqp5          | Aquaporin 5                                              |
| 0.25 | 0.13 | Mm.352239 | Gpsn2         | Glycoprotein, synaptic 2                                 |
| 0.25 | 0.02 | Mm.29196  | Cyc1          | Cytochrome c-1                                           |
| 0.25 | 0.03 | Mm.158231 | Sdha          | Succinate dehydrogenase complex, subunit A, flavoprotein |
| 0.25 | 0.09 | Mm.18625  | Aqp1          | Aquaporin 1                                              |
| 0.25 | 0.05 | Mm.1008   | Ptgds         | Prostaglandin D2 synthase (brain)                        |
| 0.25 | 0.04 | Mm.371545 | Arbp          | Acidic ribosomal phosphoprotein P0                       |
| 0.25 | 0.04 | Mm.371552 | Cd63          | Cd63 antigen                                             |
| 0.25 | 0.04 | Mm.337038 | Arpc2         | Actin related protein 2/3 complex, subunit 2             |
| 0.25 | 0.09 | Mm.347009 | Prdx2         | Peroxiredoxin 2                                          |
| 0.25 | 0.09 | Mm.3128   | Cox7c         | Cytochrome c oxidase, subunit VIIc                       |
| 0.25 | 0.07 | Mm.379295 | Glo1          | Glyoxalase 1                                             |
| 0.25 | 0.08 | Mm.17604  | Gnb5          | Guanine nucleotide binding protein, beta 5               |
| 0.25 | 0.11 | Mm.11535  | Wdr23         | WD repeat domain 23                                      |
| 0.25 | 0.06 | Mm.316179 | Ftl1          | Ferritin light chain 1                                   |
| 0.25 | 0.06 | Mm.334160 | Spon1         | Spondin 1                                                |
| 0.25 | 0.09 | AK122514  | not found     | Mus musculus mRNA for mKIAA1466 protein                  |
| 0.25 | 0.11 | Mm.249986 | 2410016F01Rik | Ring finger protein 187                                  |
| 0.25 | 0.10 | Mm.18590  | Tm4sf2        | Tetraspanin 7                                            |
| 0.25 | 0.17 | Mm.248827 | Canx          | Calnexin                                                 |
| 0.25 | 0.12 | Mm.26680  | 1110031B06Rik | RIKEN cDNA 1110031B06 gene                               |
| 0.25 | 0.09 | Mm.180013 | Aes           | Amino-terminal enhancer of split                         |
| 0.25 | 0.13 | M10062    | not found     | not found                                                |
| 0.25 | 0.10 | Mm.212763 | 2210412K09Rik | Chromatin modifying protein 5                            |

|      |      |           |               |                                                                           |
|------|------|-----------|---------------|---------------------------------------------------------------------------|
| 0.25 | 0.02 | Mm.294263 | Rp1h          | Mus musculus retinitis pigmentosa 1 homolog (human)                       |
| 0.25 | 0.08 | Mm.276802 | Snrpg         | Small nuclear ribonucleoprotein polypeptide G                             |
| 0.25 | 0.07 | Mm.335942 | Set           | SET translocation                                                         |
| 0.25 | 0.17 | Mm.279821 | Eif4a1        | Eukaryotic translation initiation factor 4A1                              |
| 0.25 | 0.10 | Mm.315189 | H3f3a         | H3 histone, family 3A                                                     |
| 0.25 | 0.13 | Mm.342959 | Krt1-12       | Keratin complex 1, acidic, gene 12                                        |
| 0.25 | 0.13 | AK122514  | not found     | Mus musculus mRNA for mKIAA1466 protein                                   |
| 0.25 | 0.10 | Mm.153272 | Tgfbli4       | TSC22-related inducible leucine zipper 1b                                 |
| 0.25 | 0.13 | Mm.181430 | Dnchc1        | Dynein, cytoplasmic, heavy chain 1                                        |
| 0.25 | 0.07 | Mm.29405  | Rbx1          | Ring-box 1                                                                |
| 0.25 | 0.07 | Mm.261672 | Hist1h2bf     | Histone 1, H2bf                                                           |
| 0.25 | 0.09 | Mm.30085  | Akr1a4        | Aldo-keto reductase family 1, member A4 (aldehyde reductase)              |
| 0.25 | 0.10 | Mm.277488 | not found     | Structural glucose phosphate isomerase 1                                  |
| 0.25 | 0.06 | Mm.260877 | BC016201      | cDNA sequence BC016201                                                    |
| 0.26 | 0.06 | Mm.134516 | Otx2          | Orthodenticle homolog 2 (Drosophila)                                      |
| 0.26 | 0.11 | Mm.101141 | Rnf121        | Ring finger protein 121                                                   |
| 0.26 | 0.08 | Mm.25148  | Atp6ap2       | ATPase, H <sup>+</sup> transporting, lysosomal accessory protein 2        |
| 0.26 | 0.04 | Mm.133851 | Mrpl12        | Mitochondrial ribosomal protein L12                                       |
| 0.26 | 0.19 | Mm.156506 | Pcdh21        | Protocadherin 21                                                          |
| 0.26 | 0.13 | Mm.24006  | S100a14       | S100 calcium binding protein A14                                          |
| 0.26 | 0.08 | Mm.277713 | D3Jfr1        | Cold shock domain containing E1, RNA binding                              |
| 0.26 | 0.04 | Mm.1948   | Tctex1        | T-complex testis expressed 1                                              |
| 0.26 | 0.11 | Mm.293605 | Trp53inp2     | Tumor protein p53 inducible nuclear protein 2                             |
| 0.26 | 0.13 | Mm.260256 | Eif4g1        | Eukaryotic translation initiation factor 4, gamma 1, transcript variant 1 |
| 0.26 | 0.08 | Mm.235123 | Immt          | Inner membrane protein, mitochondrial                                     |
| 0.26 | 0.07 | Mm.300083 | 4933434E20Rik | RIKEN cDNA 4933434E20 gene                                                |



|      |      |           |               |                                                                                  |
|------|------|-----------|---------------|----------------------------------------------------------------------------------|
| 0.26 | 0.16 | Mm.273277 | Trim29        | Tripartite motif protein 29                                                      |
| 0.26 | 0.11 | Mm.261679 | Wwp2          | Ribosomal protein S26                                                            |
| 0.26 | 0.11 | Mm.383179 | Got2          | Glutamate oxaloacetate transaminase 2                                            |
| 0.26 | 0.11 | Mm.290110 | Dnajb6        | DnaJ (Hsp40) homolog, subfamily B, member 6                                      |
| 0.26 | 0.15 | Mm.30155  | Atp6v0c       | ATPase, H <sup>+</sup> transporting, V0 subunit C                                |
| 0.26 | 0.04 | Mm.249110 | Snrpe         | Small nuclear ribonucleoprotein E                                                |
| 0.26 | 0.07 | Mm.371635 | Pin4          | protein (peptidyl-prolyl cis/trans isomerase) NIMA-interacting, 4 [Mus musculus] |
| 0.26 | 0.12 | Mm.33263  | H2-D1         | Histocompatibility 2, D region                                                   |
| 0.26 | 0.07 | Mm.27886  | 2410011G03Rik | NADH dehydrogenase (ubiquinone) 1 alpha subcomplex, 12                           |
| 0.26 | 0.05 | Mm.248906 | Sca10         | Spinocerebellar ataxia 10 homolog (human)                                        |
| 0.26 | 0.08 | Mm.41271  | Stard7        | START domain containing 7                                                        |
| 0.26 | 0.03 | Mm.290022 | Eif4b         | Eukaryotic translation initiation factor 4B (Eif4b)                              |
| 0.26 | 0.07 | Mm.17851  | Ndufa3        | NADH dehydrogenase (ubiquinone) 1 alpha subcomplex, 3                            |
| 0.26 | 0.13 | Mm.274376 | Rdh10         | Retinol dehydrogenase 10 (all-trans)                                             |
| 0.26 | 0.14 | Mm.16716  | Lamp1         | Lysosomal membrane glycoprotein 1                                                |
| 0.26 | 0.14 | AK083524  | not found     | Mus musculus 9 days embryo whole body cDNA                                       |
| 0.26 | 0.09 | AK088963  | not found     | not found                                                                        |
| 0.26 | 0.13 | Mm.306770 | Mylc2b        | Myosin light chain, regulatory B                                                 |
| 0.26 | 0.08 | Mm.544    | Pea15         | Phosphoprotein enriched in astrocytes 15                                         |
| 0.26 | 0.05 | Mm.378930 | Gstp1         | Glutathione S-transferase, pi 1                                                  |
| 0.26 | 0.04 | Mm.3981   | Cops6         | COP9 (constitutive photomorphogenic) homolog, subunit 6 (Arabidopsis thaliana)   |
| 0.26 | 0.13 | Mm.316179 | Ftl1          | Ferritin light chain 1                                                           |
| 0.27 | 0.07 | Mm.305152 | Apoe          | Apolipoprotein E                                                                 |
| 0.27 | 0.09 | AK088963  | not found     | Mus musculus 2 days neonate thymus thymic cells cDNA                             |
| 0.27 | 0.11 | K00987    | not found     | not found                                                                        |
| 0.27 | 0.05 | Mm.192285 | A930004D23Rik | Complexin 4                                                                      |

|      |      |           |               |                                                                 |
|------|------|-----------|---------------|-----------------------------------------------------------------|
| 0.27 | 0.13 | Mm.29317  | Actr10        | ARP10 actin-related protein 10 homolog ( <i>S. cerevisiae</i> ) |
| 0.27 | 0.07 | Mm.216135 | Pkm2          | Pyruvate kinase, muscle                                         |
| 0.27 | 0.08 | Mm.271744 | Pfn2          | Profilin 2                                                      |
| 0.27 | 0.14 | Mm.21669  | Ndufs2        | NADH dehydrogenase (ubiquinone) Fe-S protein 2                  |
| 0.27 | 0.12 | Mm.5265   | 2310016M24Rik | RIKEN cDNA 2310016M24 gene                                      |
| 0.27 | 0.07 | Mm.349277 | Rpl18         | Ribosomal protein L18                                           |
| 0.27 | 0.09 | Mm.336329 | Uba52         | Ubiquitin A-52 residue ribosomal protein fusion product 1       |
| 0.27 | 0.12 | AK083524  | not found     | Mus musculus 9 days embryo whole body cDNA                      |
| 0.27 | 0.09 | Mm.258955 | 2510003E04Rik | RIKEN cDNA 2510003E04 gene                                      |
| 0.27 | 0.04 | Mm.371592 | Ubb           | Ubiquitin B                                                     |
| 0.27 | 0.13 | AK122514  | not found     | hypothetical protein LOC639857                                  |
| 0.27 | 0.08 | Mm.23758  | Poldip3       | Polymerase (DNA-directed), delta interacting protein 3          |
| 0.27 | 0.11 | Mm.28897  | Pyp           | Pyrophosphatase                                                 |
| 0.27 | 0.08 | Mm.16756  | Si            | Silver                                                          |
| 0.27 | 0.02 | Mm.260527 | Lcmt1         | Leucine carboxyl methyltransferase 1                            |
| 0.27 | 0.10 | Mm.31927  | Tm4sf9        | Tetraspanin 5                                                   |
| 0.27 | 0.08 | Mm.291370 | Rds           | Retinal degeneration, slow (retinitis pigmentosa 7)             |
| 0.27 | 0.11 | Mm.362119 | Cox7a2l       | Cytochrome c oxidase subunit VIIa polypeptide 2-like            |
| 0.27 | 0.09 | AK083524  | not found     | Mus musculus 9 days embryo whole body cDNA                      |
| 0.27 | 0.05 | Mm.29939  | Ndufa9        | NADH dehydrogenase (ubiquinone) 1 alpha subcomplex, 9           |
| 0.27 | 0.09 | Mm.297096 | Mdh2          | Malate dehydrogenase 2, NAD (mitochondrial)                     |
| 0.27 | 0.02 | Mm.334160 | Spon1         | Spondin 1, (f-spondin) extracellular matrix protein             |
| 0.27 | 0.10 | Mm.29924  | Arl6ip1       | ADP-ribosylation factor-like 6 interacting protein 1            |
| 0.27 | 0.07 | Mm.252255 | Psma2         | Proteasome (prosome, macropain) subunit, alpha type 2           |
| 0.27 | 0.08 | Mm.23693  | Dncl2a        | Dynein, cytoplasmic, light chain 2A                             |
| 0.27 | 0.11 | Mm.29742  | Cd24a         | CD24a antigen                                                   |

|      |      |           |               |                                                                                  |
|------|------|-----------|---------------|----------------------------------------------------------------------------------|
| 0.27 | 0.09 | Mm.379006 | Rps29         | Ribosomal protein S29                                                            |
| 0.28 | 0.13 | AK122514  | not found     | Mus musculus mRNA for mKIAA1466 protein                                          |
| 0.28 | 0.15 | Mm.277349 | Park7         | Parkinson disease (autosomal recessive, early onset) 7                           |
| 0.28 | 0.19 | Mm.340163 | Myh8          | Myosin, heavy polypeptide 4, skeletal muscle                                     |
| 0.28 | 0.08 | Mm.378896 | Cnga1         | cGMP-gated cation channel protein                                                |
| 0.28 | 0.15 | Mm.14719  | Gsta3         | Glutathione S-transferase, alpha 3                                               |
| 0.28 | 0.13 | Mm.233813 | Ywhag         | 3-monooxygenase/tryptophan 5-monooxygenase activation protein, gamma polypeptide |
| 0.28 | 0.11 | Mm.19133  | Aplp2         | Amyloid beta (A4) precursor-like protein 2                                       |
| 0.28 | 0.08 | Mm.27365  | Fath          | FATH protein                                                                     |
| 0.28 | 0.15 | Mm.371546 | Arf1          | ADP-ribosylation factor 1                                                        |
| 0.28 | 0.06 | Mm.290353 | 1810045K07Rik | Transmembrane protein 66                                                         |
| 0.28 | 0.16 | Mm.42855  | Ptov1         | Prostate tumor over expressed gene 1                                             |
| 0.28 | 0.08 | Mm.358649 | Banf1         | Barrier to autointegration factor 1                                              |
| 0.28 | 0.10 | Mm.34609  | Plac8         | C15 protein                                                                      |
| 0.28 | 0.14 | Mm.88212  | Tuba6         | Tubulin, alpha 6                                                                 |
| 0.28 | 0.08 | Mm.201455 | Scamp1        | Secretory carrier membrane protein 1                                             |
| 0.28 | 0.14 | Mm.182962 | Eif3s5        | Eukaryotic translation initiation factor 3, subunit 5 (epsilon)                  |
| 0.28 | 0.08 | Mm.158231 | Sdha          | Succinate dehydrogenase complex, subunit A, flavoprotein (Fp)                    |
| 0.28 | 0.10 | Mm.271703 | Gnai3         | Guanine nucleotide binding protein, alpha inhibiting 3                           |
| 0.28 | 0.10 | Mm.2766   | Pvalb         | Parvalbumin                                                                      |
| 0.28 | 0.11 | Mm.243234 | Psmc2         | Proteasome (prosome, macropain) 26S subunit, non-ATPase, 2                       |
| 0.28 | 0.16 | Mm.30438  | Tyrp1         | Tyrosinase-related protein 1                                                     |
| 0.28 | 0.09 | Mm.134516 | Otx2          | Orthodenticle homolog 2 (Drosophila)                                             |
| 0.28 | 0.13 | Mm.271275 | Ifi27         | Interferon stimulated gene 12                                                    |
| 0.28 | 0.13 | Mm.38951  | Sucla2        | ATP-specific succinyl-CoA synthetase beta subunit                                |
| 0.28 | 0.11 | Mm.3532   | Tmsb10        | Thymosin, beta 10                                                                |

|      |      |           |               |                                                                                         |
|------|------|-----------|---------------|-----------------------------------------------------------------------------------------|
| 0.28 | 0.07 | Mm.34268  | Cdc42ep5      | CDC42 effector protein (Rho GTPase binding) 5                                           |
| 0.28 | 0.07 | Mm.45044  | Srf           | Serum response factor                                                                   |
| 0.28 | 0.04 | Mm.311549 | Atp6v1d       | ATPase, H <sup>+</sup> transporting, V1 subunit D                                       |
| 0.28 | 0.14 | Mm.255631 | Slc17a7       | Solute carrier family 17 (sodium-dependent inorganic phosphate cotransporter), member 7 |
| 0.28 | 0.06 | Mm.273496 | Zfr           | Zinc finger RNA binding protein                                                         |
| 0.28 | 0.12 | Mm.263124 | Ly6a          | Lymphocyte antigen 6 complex, locus A                                                   |
| 0.28 | 0.09 | Mm.1971   | Calr          | Calreticulin                                                                            |
| 0.28 | 0.10 | Mm.182912 | Ghitm         | Growth hormone inducible transmembrane protein                                          |
| 0.28 | 0.07 | Mm.373613 | Mpp4          | Membrane protein, palmitoylated 4 (MAGUK p55 subfamily member 4)                        |
| 0.28 | 0.07 | Mm.40324  | Cryba4        | Crystallin, beta A4                                                                     |
| 0.28 | 0.07 | Mm.22085  | Arl3          | ADP-ribosylation factor-like 3                                                          |
| 0.28 | 0.17 | Mm.1186   | Car2          | Carbonic anhydrase 2                                                                    |
| 0.28 | 0.03 | Mm.45436  | Lyzs          | Lysozyme                                                                                |
| 0.29 | 0.11 | Mm.19834  | Ndufa8        | NADH dehydrogenase (ubiquinone) 1 alpha subcomplex, 8                                   |
| 0.29 | 0.08 | Mm.291247 | Arl1          | ADP-ribosylation factor-like 1                                                          |
| 0.29 | 0.13 | Mm.294138 | Ppp2r1a       | Protein phosphatase 2 (formerly 2A), regulatory subunit A (PR 65), alpha isoform        |
| 0.29 | 0.03 | Mm.4871   | Timp3         | Timp3: Tissue inhibitor of metalloproteinase 3                                          |
| 0.29 | 0.14 | Mm.21629  | Abcf2         | ATP-binding cassette, sub-family F (GCN20), member 2                                    |
| 0.29 | 0.11 | Mm.306954 | Car14         | Carbonic anhydrase 14                                                                   |
| 0.29 | 0.05 | Mm.29214  | 2010311D03Rik | RIKEN cDNA 2010311D03 gene                                                              |
| 0.29 | 0.09 | Mm.14825  | Idh3g         | Isocitrate dehydrogenase 3 (NAD <sup>+</sup> ), gamma                                   |
| 0.29 | 0.08 | Mm.220038 | Ddx5          | DEAD (Asp-Glu-Ala-Asp) box polypeptide 5                                                |
| 0.29 | 0.12 | Mm.2125   | Them2         | Thioesterase superfamily member 2                                                       |
| 0.29 | 0.11 | Mm.379116 | 2010107H07Rik | PREDICTED: Mus musculus RIKEN cDNA 2010107H07 gene                                      |
| 0.29 | 0.04 | Mm.28405  | Sgk           | Serum/glucocorticoid regulated kinase                                                   |
| 0.29 | 0.10 | Mm.4071   | Lamr1         | Laminin receptor 1 (ribosomal protein SA)                                               |

|      |      |           |            |                                                              |
|------|------|-----------|------------|--------------------------------------------------------------|
| 0.29 | 0.12 | Mm.21454  | Cbr2       | Carbonyl reductase 2                                         |
| 0.29 | 0.08 | Mm.378928 | Gstm1      | Glutathione S-transferase, mu 1                              |
| 0.29 | 0.17 | Mm.30837  | Ndrp1      | N-myc downstream regulated gene 1                            |
| 0.29 | 0.09 | Mm.34641  | Amfr       | Autocrine motility factor receptor                           |
| 0.29 | 0.12 | Mm.33304  | Pdcd5      | Programmed cell death 5                                      |
| 0.29 | 0.09 | Mm.22130  | Rpn2       | Ribophorin II                                                |
| 0.29 | 0.09 | Mm.258320 | Usp33      | Ubiquitin specific peptidase 33                              |
| 0.29 | 0.06 | Mm.289431 | Eef2       | Eukaryotic translation elongation factor 2                   |
| 0.29 | 0.10 | Mm.30119  | Sc4mol     | Sterol-C4-methyl oxidase-like                                |
| 0.29 | 0.13 | Mm.236553 | Ctsb       | Cathepsin B                                                  |
| 0.29 | 0.13 | Mm.214746 | Fbxl3      | F-box and leucine-rich repeat protein 3                      |
| 0.29 | 0.13 | Mm.2645   | Eef1a2     | Eukaryotic translation elongation factor 1 alpha 2           |
| 0.29 | 0.15 | Mm.221275 | Rtn1       | Reticulon 1, transcript variant 1                            |
| 0.29 | 0.10 | Mm.371688 | Btf3       | Basic transcription factor 3                                 |
| 0.29 | 0.15 | Mm.371598 | Ncoa4      | Nuclear receptor coactivator 4                               |
| 0.29 | 0.07 | Mm.218198 | Psmc14     | Proteasome (prosome, macropain) 26S subunit, non-ATPase, 14  |
| 0.29 | 0.11 | Mm.313076 | Ppp1r13b   | Protein phosphatase 1, regulatory (inhibitor) subunit 13B    |
| 0.29 | 0.11 | Mm.279823 | Ndufa11    | NADH dehydrogenase (ubiquinone) 1 alpha subcomplex 11        |
| 0.29 | 0.11 | Mm.378896 | Cnga1      | CGMP-gated cation channel protein                            |
| 0.29 | 0.07 | Mm.249096 | Atp6v1b2   | ATPase, H <sup>+</sup> transporting, V1 subunit B, isoform 2 |
| 0.29 | 0.05 | Mm.304265 | Rpl29      | Ribosomal protein L29, mRNA                                  |
| 0.29 | 0.10 | Mm.4646   | Krt1-13    | Keratin complex 1, acidic, gene 13                           |
| 0.29 | 0.06 | Mm.14825  | Idh3g      | Isocitrate dehydrogenase 3 (NAD <sup>+</sup> ), gamma        |
| 0.29 | 0.13 | Mm.27839  | D19Ert721e | DNA segment, Chr 19, ERATO Doi 721, expressed                |
| 0.29 | 0.04 | Mm.271174 | Skiip      | SNW domain containing 1                                      |
| 0.29 | 0.12 | Mm.352311 | Dtnbp1     | Dystrobrevin binding protein 1                               |

|      |      |           |               |                                                                                |
|------|------|-----------|---------------|--------------------------------------------------------------------------------|
| 0.29 | 0.14 | Mm.255631 | Slc17a7       | Solute carrier family 17 (sodium-dependent inorganic phosphate cotransporter)  |
| 0.29 | 0.11 | Mm.4337   | Ei24          | Etoposide induced 2.4                                                          |
| 0.29 | 0.02 | Mm.1129   | Ndufb10       | NADH dehydrogenase (ubiquinone) 1 beta subcomplex, 10                          |
| 0.29 | 0.09 | Mm.158231 | Sdha          | Succinate dehydrogenase complex, subunit A, flavoprotein                       |
| 0.29 | 0.10 | Mm.379059 | Atp5f1        | ATP synthase, H <sup>+</sup> transporting, mitochondrial F0 complex, subunit g |
| 0.30 | 0.10 | Mm.256858 | Dncl1         | Dynein, cytoplasmic, light chain 1                                             |
| 0.30 | 0.08 | Mm.261570 | Gtf2i         | Transcription factor TFII-I-alpha                                              |
| 0.30 | 0.08 | Mm.383225 | Gtf2f2        | General transcription factor IIF, polypeptide 2                                |
| 0.30 | 0.17 | Mm.1716   | Tnnc2         | Troponin C2, fast                                                              |
| 0.30 | 0.16 | Mm.379148 | 2700060E02Rik | RIKEN cDNA 2700060E02 gene                                                     |
| 0.30 | 0.11 | Mm.269815 | Cd164         | CD164 antigen                                                                  |
| 0.30 | 0.09 | Mm.112632 | 6330583M11Rik | RIKEN cDNA 6330583M11 gene                                                     |
| 0.30 | 0.02 | Mm.87773  | Tra1          | Tumor rejection antigen gp96                                                   |
| 0.30 | 0.14 | Mm.18565  | Plp2          | Proteolipid protein 2                                                          |
| 0.30 | 0.12 | Mm.155783 | 1300018I05Rik | RIKEN cDNA 1300018I05 gene                                                     |
| 0.30 | 0.12 | Mm.19133  | Aplp2         | Amyloid beta (A4) precursor-like protein 2                                     |
| 0.30 | 0.10 | Mm.330538 | Slc24a5       | Solute carrier family 24, member 5                                             |
| 0.30 | 0.14 | Mm.38951  | Sucla2        | ATP-specific succinyl-CoA synthetase beta subunit                              |
| 0.30 | 0.06 | Mm.27886  | 2410011G03Rik | NADH dehydrogenase (ubiquinone) 1 alpha subcomplex, 12                         |
| 0.30 | 0.09 | Mm.275413 | Tdrd7         | Tudor domain containing 7                                                      |
| 0.30 | 0.06 | Mm.3158   | Rplp1         | Ribosomal protein, large, P1                                                   |
| 0.30 | 0.13 | Mm.296985 | Cct4          | Chaperonin subunit 4 (delta)                                                   |
| 0.30 | 0.13 | Mm.259976 | Adipor1       | Adiponectin receptor 1                                                         |
| 0.30 | 0.08 | Mm.294263 | Rp1h          | Mus musculus retinitis pigmentosa 1 homolog (human)                            |
| 0.30 | 0.11 | Mm.192580 | Rtn4          | RTN4                                                                           |
| 0.30 | 0.11 | Mm.235123 | Immt          | Inner membrane protein, mitochondrial                                          |

|      |      |           |               |                                                                    |
|------|------|-----------|---------------|--------------------------------------------------------------------|
| 0.30 | 0.05 | Mm.283217 | C2            | Complement component 2 (within H-2S)                               |
| 0.30 | 0.15 | Mm.35016  | H2-T23        | Histocompatibility 2, T region locus 23                            |
| 0.30 | 0.10 | Mm.263177 | Grp58         | Protein disulfide isomerase associated 3                           |
| 0.30 | 0.11 | AK088963  | not found     | Mus musculus 2 days neonate thymus thymic cells cDNA               |
| 0.30 | 0.04 | Mm.371563 | H3f3b         | H3 histone, family 3B                                              |
| 0.30 | 0.08 | Mm.207052 | Atp6v0b       | ATPase, H <sup>+</sup> transporting                                |
| 0.30 | 0.10 | Mm.292510 | Rac1          | RAS-related C3 botulinum substrate 1                               |
| 0.30 | 0.09 | Mm.246881 | 1110015E22Rik | Glycerophosphodiester phosphodiesterase domain containing 3        |
| 0.30 | 0.11 | Mm.31625  | Mip           | Major intrinsic protein of eye lens fiber                          |
| 0.30 | 0.11 | Mm.290960 | Clptm1        | Cleft lip and palate associated transmembrane protein 1            |
| 0.30 | 0.11 | Mm.15125  | Sdfr1         | Stromal cell derived factor receptor 1                             |
| 0.30 | 0.10 | Mm.830    | Psmel         | Proteasome (prosome, macropain) 28 subunit, alpha                  |
| 0.30 | 0.11 | Mm.333849 | Ndg2          | Nur77 downstream gene 2                                            |
| 0.30 | 0.15 | Mm.17613  | 6330514A18Rik | RIKEN cDNA 6330514A18 gene                                         |
| 0.30 | 0.14 | Mm.315962 | Pgam1         | Phosphoglycerate mutase 1                                          |
| 0.30 | 0.10 | Mm.270278 | Tef           | Thyrotroph embryonic factor, transcript variant 2                  |
| 0.30 | 0.08 | Mm.18539  | Pink1         | PINK1 mRNA for PTEN induced putative kinase 1                      |
| 0.30 | 0.14 | Mm.21961  | Atp6ap1       | ATPase, H <sup>+</sup> transporting, lysosomal accessory protein 1 |
| 0.30 | 0.13 | Mm.124176 | Limk2         | LIM motif-containing protein kinase 2                              |
| 0.31 | 0.10 | Mm.12758  | Fkbp4         | FK506 binding protein 4                                            |
| 0.31 | 0.10 | Mm.27606  | Tmed3         | Transmembrane emp24 domain containing 3                            |
| 0.31 | 0.11 | Mm.256875 | 2900006B13Rik | RIKEN cDNA 2900006B13 gene                                         |
| 0.31 | 0.08 | Mm.141054 | 5530600A18Rik | Ankyrin repeat domain 40                                           |
| 0.31 | 0.14 | Mm.272460 | Gabarap       | Gamma-aminobutyric acid receptor associated protein                |
| 0.31 | 0.14 | Mm.290774 | not found     | MRNA fragment for heat shock cognate hsc73                         |
| 0.31 | 0.06 | Mm.276337 | Rpl17         | Ribosomal protein L17                                              |

|      |      |           |               |                                                                                           |
|------|------|-----------|---------------|-------------------------------------------------------------------------------------------|
| 0.31 | 0.08 | Mm.248360 | Anxa1         | Annexin A1                                                                                |
| 0.31 | 0.12 | Mm.266875 | Ppl           | Periplakin                                                                                |
| 0.31 | 0.11 | Mm.52     | D11Ert99e     | DNA segment, Chr 11, ERATO Doi 99, expressed                                              |
| 0.31 | 0.07 | Mm.258204 | Nsep1         | Mus musculus similar to nuclease sensitive element binding protein 1                      |
| 0.31 | 0.07 | Mm.289810 | Rpl14         | Ribosomal protein L14                                                                     |
| 0.31 | 0.09 | Mm.209385 | Lpp           | Mortality factor 4 like 1                                                                 |
| 0.31 | 0.14 | Mm.124176 | Limk2         | LIM motif-containing protein kinase 2                                                     |
| 0.31 | 0.04 | Mm.24118  | Gstt2         | Glutathione S-transferase, theta 2                                                        |
| 0.31 | 0.05 | Mm.29296  | Sec13l1       | SEC13-like 1 ( <i>S. cerevisiae</i> )                                                     |
| 0.31 | 0.11 | Mm.378944 | Hspd1         | Heat shock protein 1 (chaperonin)                                                         |
| 0.31 | 0.11 | Mm.38993  | Clstn1        | Calsyntenin 1                                                                             |
| 0.31 | 0.09 | Mm.379226 | Cabp4         | Calcium binding protein 4                                                                 |
| 0.31 | 0.17 | Mm.233470 | Igfbp7        | Insulin-like growth factor binding protein 7                                              |
| 0.31 | 0.12 | Mm.234832 | Igsf4a        | RA175                                                                                     |
| 0.31 | 0.09 | Mm.270278 | Tef           | Thyrotroph embryonic factor, transcript variant 2                                         |
| 0.31 | 0.07 | Mm.374758 | Fau           | Finkel-Biskis-Reilly murine sarcoma virus (FBR-MuSV) ubiquitously expressed (fox derived) |
| 0.31 | 0.08 | Mm.248615 | Lgals3        | Lectin, galactose binding, soluble 3                                                      |
| 0.31 | 0.09 | AK050666  | not found     | Mus musculus 2 days neonate thymus thymic cells cDNA                                      |
| 0.31 | 0.08 | Mm.333597 | Ap2s1         | Adaptor-related protein complex 2, sigma 1 subunit                                        |
| 0.31 | 0.17 | Mm.275555 | Cnn3          | Calponin 3, acidic                                                                        |
| 0.31 | 0.14 | Mm.3624   | Guk1          | Guanylate kinase 1                                                                        |
| 0.31 | 0.09 | Mm.154136 | 2500003M10Rik | RIKEN cDNA 2500003M10 gene                                                                |
| 0.31 | 0.11 | Mm.3925   | S100a4        | S100 calcium binding protein A4                                                           |
| 0.31 | 0.11 | Mm.27365  | Fath          | FATH protein                                                                              |
| 0.31 | 0.10 | Mm.217318 | Mtap4         | Microtubule-associated protein 4                                                          |
| 0.31 | 0.11 | Mm.342703 | Kif13a        | KIF13A                                                                                    |



|      |      |           |               |                                                                          |
|------|------|-----------|---------------|--------------------------------------------------------------------------|
| 0.31 | 0.11 | Mm.246990 | Rtn3          | Reticulon 3, transcript variant 4                                        |
| 0.31 | 0.13 | AK088963  | not found     | Mus musculus 2 days neonate thymus thymic cells cDNA                     |
| 0.31 | 0.06 | Mm.38274  | Chi311        | Chitinase 3-like 1                                                       |
| 0.31 | 0.15 | Mm.268027 | 2900064A13Rik | RIKEN cDNA 2900064A13 gene                                               |
| 0.31 | 0.14 | Mm.163    | B2m           | Beta-2 microglobulin                                                     |
| 0.31 | 0.11 | Mm.43871  | Trim35        | Tripartite motif-containing 35                                           |
| 0.31 | 0.08 | Mm.214950 | Acta1         | Actin, alpha 1, skeletal muscle                                          |
| 0.31 | 0.06 | Mm.379251 | Rpl18a        | Ribosomal protein L18A                                                   |
| 0.31 | 0.12 | Mm.2777   | Tpd52         | PC-1                                                                     |
| 0.31 | 0.09 | Mm.290960 | Clptm1        | Cleft lip and palate associated transmembrane protein 1                  |
| 0.31 | 0.12 | Mm.246377 | Tubb2         | Tubulin, beta 2                                                          |
| 0.31 | 0.04 | Mm.41890  | 2010315L10Rik | RIKEN cDNA 2010315L10 gene                                               |
| 0.31 | 0.13 | Mm.30156  | Prss11        | HtrA serine peptidase 1                                                  |
| 0.31 | 0.12 | Mm.38055  | Esd           | Esterase D/formylglutathione hydrolase                                   |
| 0.31 | 0.12 | Mm.424    | Atp1b3        | ATPase, Na <sup>+</sup> /K <sup>+</sup> transporting, beta 3 polypeptide |
| 0.32 | 0.09 | Mm.27955  | Wbscr1        | Williams-Beuren syndrome chromosome region 1 homolog (human)             |
| 0.32 | 0.10 | Mm.22602  | Atp6v0e       | ATPase, H <sup>+</sup> transporting, V0 subunit                          |
| 0.32 | 0.10 | Mm.290774 | not found     | MRNA fragment for heat shock cognate hsc73                               |
| 0.32 | 0.07 | Mm.34242  | Pmvk          | Phosphomevalonate kinase                                                 |
| 0.32 | 0.17 | Mm.267027 | Lim2          | Lens intrinsic membrane protein 2                                        |
| 0.32 | 0.13 | Mm.305990 | not found     | RIKEN cDNA 2310028O11 gene                                               |
| 0.32 | 0.15 | Mm.207814 | 1500016O10Rik | Mus musculus RIKEN cDNA A330104J06 gene                                  |
| 0.32 | 0.10 | Mm.27278  | Nme3          | Expressed in non-metastatic cells 3                                      |
| 0.32 | 0.10 | Mm.3118   | Actr1a        | ARPI actin-related protein 1 homolog A (yeast)                           |
| 0.32 | 0.05 | Mm.175403 | Arl6ip2       | ADP-ribosylation factor-like 6 interacting protein 2                     |
| 0.32 | 0.12 | Mm.327618 | Stfa1         | Stefin A1                                                                |

|      |      |           |               |                                                                        |
|------|------|-----------|---------------|------------------------------------------------------------------------|
| 0.32 | 0.08 | Mm.28919  | Dstn          | Destrin                                                                |
| 0.32 | 0.18 | Mm.197518 | Laptm4b       | Lysosomal-associated protein transmembrane 4B                          |
| 0.32 | 0.11 | Mm.27606  | Tmed3         | Transmembrane emp24 domain containing 3                                |
| 0.32 | 0.12 | Mm.276042 | Actn4         | Actinin alpha 4                                                        |
| 0.32 | 0.10 | Mm.296560 | Slc38a3       | Solute carrier family 38, member 3                                     |
| 0.32 | 0.13 | Mm.2654   | Wdr1          | WD repeat domain 1                                                     |
| 0.32 | 0.13 | Mm.281896 | Cldn7         | Claudin 7                                                              |
| 0.32 | 0.06 | Mm.28291  | 2410005K20Rik | RIKEN cDNA 2410005K20 gene                                             |
| 0.32 | 0.11 | Mm.291442 | Sparc         | Secreted acidic cysteine rich glycoprotein                             |
| 0.32 | 0.05 | Mm.22130  | Rpn2          | Ribophorin II                                                          |
| 0.32 | 0.03 | Mm.342703 | Kif13a        | KIF13A                                                                 |
| 0.32 | 0.13 | Mm.379002 | Rpl28         | Ribosomal protein L28                                                  |
| 0.33 | 0.11 | BC050259  | not found     | Mus musculus tumor necrosis factor, alpha-induced protein 3            |
| 0.33 | 0.11 | Mm.218286 | Mgst3         | Microsomal glutathione S-transferase 3                                 |
| 0.33 | 0.10 | Mm.18946  | Ap2m1         | Adaptor protein complex AP-2, mu1                                      |
| 0.33 | 0.12 | Mm.160040 | Grifin        | galectin-related inter-fiber protein                                   |
| 0.33 | 0.01 | Mm.360232 | Cct6a         | Chaperonin subunit 6a (zeta)                                           |
| 0.33 | 0.11 | Mm.285322 | Mtch1         | Mitochondrial carrier homolog 1 (C. elegans)                           |
| 0.33 | 0.12 | Mm.29045  | Atp6v1e1      | V-ATPase E2 subunit                                                    |
| 0.33 | 0.13 | Mm.193041 | Map3k7ip2     | Mitogen-activated protein kinase kinase kinase 7 interacting protein 2 |
| 0.33 | 0.09 | Mm.27900  | 1810013D10Rik | RIKEN cDNA 1810013D10 gene                                             |
| 0.33 | 0.09 | Mm.29353  | 2010110M21Rik | HIG1 domain family, member 2A                                          |
| 0.33 | 0.11 | Mm.249695 | Ppm1b         | Protein phosphatase 1B, magnesium dependent, beta isoform              |
| 0.33 | 0.12 | Mm.23758  | Poldip3       | Polymerase (DNA-directed), delta interacting protein 3                 |
| 0.33 | 0.04 | Mm.23872  | A330096I21Rik | RIKEN cDNA A330096I21 gene                                             |
| 0.33 | 0.14 | Mm.133037 | Egln3         | EGL nine homolog 3 (C. elegans)                                        |

|      |      |           |               |                                                                        |
|------|------|-----------|---------------|------------------------------------------------------------------------|
| 0.33 | 0.09 | Mm.279823 | Ndufa11       | NADH dehydrogenase (ubiquinone) 1 alpha subcomplex 11                  |
| 0.33 | 0.07 | Mm.386758 | Cox4i1        | Cytochrome c oxidase subunit IV isoform 1                              |
| 0.33 | 0.02 | Mm.334206 | Uqcrc2        | Ubiquinol cytochrome c reductase core protein 2                        |
| 0.33 | 0.13 | Mm.180189 | Dgat2         | Diacylglycerol O-acyltransferase 2                                     |
| 0.33 | 0.12 | Mm.265744 | Dscr1         | Down syndrome critical region homolog 1 (human)                        |
| 0.33 | 0.11 | Mm.196580 | Ube2m         | Ubiquitin-conjugating enzyme E2M (UBC12 homolog, yeast)                |
| 0.33 | 0.05 | Mm.379231 | Actr3         | ARP3 actin-related protein 3 homolog (yeast)                           |
| 0.33 | 0.11 | Mm.322294 | Ndufb9        | NADH dehydrogenase (ubiquinone) 1 beta subcomplex, 9                   |
| 0.33 | 0.13 | Mm.296566 | Nedd8         | Neural precursor cell expressed, developmentally down-regulated gene 8 |
| 0.33 | 0.12 | Mm.56769  | Dcn           | Decorin                                                                |
| 0.33 | 0.08 | Mm.34095  | not found     | similar to Snrpf protein [Mus musculus]                                |
| 0.33 | 0.06 | Mm.2060   | Ndufb8        | NADH dehydrogenase (ubiquinone) 1 beta subcomplex 8                    |
| 0.33 | 0.12 | Mm.200916 | Gpx3          | Glutathione peroxidase 3                                               |
| 0.33 | 0.01 | Mm.158902 | 1810044A24Rik | RIKEN cDNA 1810044A24 gene                                             |
| 0.33 | 0.04 | Mm.29739  | 9030407H20Rik | Transmembrane protein 40                                               |
| 0.33 | 0.08 | Mm.27570  | Ndufa6        | NADH dehydrogenase (ubiquinone) 1 alpha subcomplex, 6 (B14)            |
| 0.33 | 0.11 | Mm.24724  | Ppp1r3c       | Protein phosphatase 1, regulatory (inhibitor) subunit 3C               |
| 0.33 | 0.11 | Mm.285993 | Calm1         | Calmodulin 1                                                           |
| 0.33 | 0.05 | Mm.29923  | Sumo2         | SMT3 suppressor of mif two 3 homolog 2 (yeast)                         |
| 0.33 | 0.08 | Mm.378899 | Crybb3        | Crystallin, beta B3                                                    |
| 0.33 | 0.09 | Mm.378994 | Rab18         | RAB18, member RAS oncogene family                                      |
| 0.33 | 0.14 | Mm.154136 | 2500003M10Rik | RIKEN cDNA 2500003M10 gene                                             |
| 0.33 | 0.05 | Mm.258633 | Stip1         | Stress-induced phosphoprotein 1                                        |
| 0.33 | 0.13 | Mm.4071   | Lamr1         | Laminin receptor 1                                                     |
| 0.33 | 0.06 | Mm.155896 | Hnrpa2b1      | Heterogeneous nuclear ribonucleoprotein A2/B1                          |
| 0.34 | 0.15 | Mm.14022  | Cox8a         | Cytochrome c oxidase, subunit VIIIa                                    |

|      |      |           |               |                                                                         |
|------|------|-----------|---------------|-------------------------------------------------------------------------|
| 0.34 | 0.08 | Mm.43871  | Trim35        | Tripartite motif-containing 35                                          |
| 0.34 | 0.06 | Mm.130793 | Upk1b         | Uroplakin 1B                                                            |
| 0.34 | 0.07 | Mm.15701  | Trim28        | Tripartite motif protein 28                                             |
| 0.34 | 0.06 | Mm.27270  | Dctn5         | Dynactin 5                                                              |
| 0.34 | 0.03 | Mm.21749  | 5430437P03Rik | RIKEN cDNA 5430437P03 gene                                              |
| 0.34 | 0.03 | Mm.3913   | Eno2          | Enolase 2, gamma neuronal                                               |
| 0.34 | 0.06 | Mm.29122  | 0610012D09Rik | RIKEN cDNA 0610012D09 gene                                              |
| 0.34 | 0.06 | Mm.378960 | Gzmm          | Granzyme M (lymphocyte met-ase 1)                                       |
| 0.34 | 0.10 | AK002571  | not found     | Mus musculus adult male kidney cDNA                                     |
| 0.34 | 0.09 | Mm.240850 | Bcas1         | Breast carcinoma amplified sequence 1                                   |
| 0.34 | 0.04 | Mm.3757   | Prpf8         | Pre-mRNA processing factor 8                                            |
| 0.34 | 0.14 | Mm.383283 | 4930412F15Rik | Small EDRK-rich factor 2                                                |
| 0.34 | 0.06 | Mm.297768 | Arf4          | ADP-ribosylation factor 4                                               |
| 0.34 | 0.07 | Mm.297196 | 2810055E05Rik | RIKEN cDNA 2810055E05 gene                                              |
| 0.34 | 0.07 | Mm.378897 | Cox6c         | Cytochrome c oxidase, subunit Vic                                       |
| 0.34 | 0.16 | Mm.180013 | Aes           | Amino-terminal enhancer of split                                        |
| 0.34 | 0.06 | Mm.241604 | 1110060F11Rik | RER1 retention in endoplasmic reticulum 1 homolog                       |
| 0.34 | 0.11 | Mm.266668 | BC005537      | RIKEN cDNA 8030460C05 gene                                              |
| 0.34 | 0.05 | Mm.175403 | Arl6ip2       | ADP-ribosylation factor-like 6 interacting protein 2                    |
| 0.34 | 0.12 | Mm.29405  | Rbx1          | Ring-box 1                                                              |
| 0.34 | 0.10 | Mm.289900 | Cct7          | Chaperonin subunit 7 (eta)                                              |
| 0.34 | 0.05 | Mm.56987  | Opn1sw        | Opsin 1 (cone pigments), short-wave-sensitive (color blindness, tritan) |
| 0.34 | 0.07 | Mm.249986 | 2410016F01Rik | Ring finger protein 187                                                 |
| 0.34 | 0.07 | Mm.379371 | Aamp          | Angio-associated migratory protein                                      |
| 0.34 | 0.10 | Mm.24174  | Aars          | Alanyl-tRNA synthetase                                                  |
| 0.34 | 0.09 | Mm.6065   | Impdh2        | Inosine 5'-phosphate dehydrogenase 2                                    |

|      |      |           |               |                                                                                    |
|------|------|-----------|---------------|------------------------------------------------------------------------------------|
| 0.34 | 0.09 | Mm.379009 | Sat1          | Spermidine/spermine N1-acetyl transferase 1                                        |
| 0.34 | 0.06 | Mm.280233 | Ube2b         | Ubiquitin-conjugating enzyme E2B, RAD6 homology (S. cerevisiae)                    |
| 0.34 | 0.12 | Mm.319038 | Dad1          | Defender against cell death 1                                                      |
| 0.34 | 0.11 | Mm.204969 | Spna2         | Spectrin alpha 2                                                                   |
| 0.34 | 0.09 | Mm.30156  | Prss11        | HtrA serine peptidase 1                                                            |
| 0.34 | 0.12 | Mm.21855  | Pglyrp1       | Peptidoglycan recognition protein 1                                                |
| 0.34 | 0.03 | Mm.286349 | Plrg1         | Pleiotropic regulator 1, PRL1 homolog (Arabidopsis)                                |
| 0.34 | 0.08 | Mm.22216  | Dsip1         | TSC22 domain family 3                                                              |
| 0.35 | 0.02 | Mm.193212 | 6430559E15Rik | Hydroxypyruvate isomerase homolog (E. coli)                                        |
| 0.35 | 0.06 | Mm.2654   | Wdr1          | WD repeat domain 1                                                                 |
| 0.35 | 0.05 | Mm.243234 | Psmc2         | Proteasome (prosome, macropain) 26S subunit, non-ATPase, 2                         |
| 0.35 | 0.09 | Mm.316438 | Ckmt2         | Creatine kinase, mitochondrial 2                                                   |
| 0.35 | 0.05 | Mm.212927 | Tmem38a       | Transmembrane protein 38a                                                          |
| 0.35 | 0.13 | Mm.335450 | Fdps          | Farnesyl diphosphate synthetase                                                    |
| 0.35 | 0.07 | Mm.353923 | Rps12         | Ribosomal protein S12                                                              |
| 0.35 | 0.09 | Mm.335942 | Set           | SET translocation                                                                  |
| 0.35 | 0.05 | Mm.22682  | Pip5k2c       | Phosphatidylinositol-4-phosphate 5-kinase, type II, gamma                          |
| 0.35 | 0.08 | Mm.287826 | Sfrs9         | Splicing factor, arginine/serine rich 9                                            |
| 0.35 | 0.08 | Mm.253329 | BC010787      | CDNA sequence BC010787                                                             |
| 0.35 | 0.07 | Mm.289915 | Ddb1          | Damaged-DNA recognition protein 1                                                  |
| 0.35 | 0.03 | Mm.3757   | Prpf8         | Pre-mRNA processing factor 8                                                       |
| 0.35 | 0.11 | Mm.83949  | Elov14        | Elongation of very long chain fatty acids (FEN1/Elo2, SUR4/Elo3, yeast)-like 4     |
| 0.35 | 0.06 | Mm.29025  | Dctn3         | Dynactin 3                                                                         |
| 0.35 | 0.14 | Mm.30155  | Atp6v0c       | ATPase, H <sup>+</sup> transporting, V0 subunit C                                  |
| 0.35 | 0.11 | Mm.38010  | Atic          | 5-aminoimidazole-4-carboxamide ribonucleotide formyltransferase/IMP cyclohydrolase |
| 0.35 | 0.07 | Mm.371610 | Arpc1a        | Actin related protein 2/3 complex, subunit 1A                                      |

|      |      |           |               |                                                                                   |
|------|------|-----------|---------------|-----------------------------------------------------------------------------------|
| 0.35 | 0.04 | AK083524  | not found     | Mus musculus 9 days embryo whole body cDNA                                        |
| 0.35 | 0.05 | Mm.252987 | Slc12a5       | Solute carrier family 12, member 5                                                |
| 0.35 | 0.07 | Mm.27503  | 1810009A15Rik | RIKEN cDNA 1810009A15 gene                                                        |
| 0.35 | 0.10 | Mm.2402   | AA536749      | Expressed sequence AA536749, transcript variant 1                                 |
| 0.35 | 0.12 | Mm.157105 | Psmc1         | Protease (prosome, macropain) 26S subunit, ATPase 1                               |
| 0.35 | 0.07 | Mm.254114 | D10Ert214e    | DNA segment, Chr 10, ERATO Doi 214                                                |
| 0.35 | 0.13 | Mm.246432 | Idh2          | Isocitrate dehydrogenase 2 (NADP+), mitochondrial                                 |
| 0.35 | 0.08 | Mm.379226 | Cabp4         | Calcium binding protein 4                                                         |
| 0.35 | 0.10 | Mm.261670 | Hist2h2aa1    | Histone 2, H2aa1                                                                  |
| 0.35 | 0.09 | Mm.209385 | Lpp           | Mortality factor 4 like 1                                                         |
| 0.35 | 0.09 | Mm.272582 | Pfkm          | Phosphofructokinase, muscle                                                       |
| 0.35 | 0.13 | Mm.284649 | BC005662      | CDNA sequence BC005662                                                            |
| 0.35 | 0.07 | Mm.275446 | Drap1         | Dr1 associated protein 1 (negative cofactor 2 alpha)                              |
| 0.35 | 0.01 | Mm.379115 | Rpl36al       | Ribosomal protein L36a-like                                                       |
| 0.35 | 0.12 | Mm.378901 | Csnk2b        | Casein kinase II, beta subunit                                                    |
| 0.35 | 0.08 | Mm.359377 | Rpl29         | Ribosomal protein L29                                                             |
| 0.35 | 0.04 | Mm.379142 | 1810037I17Rik | RIKEN cDNA 1810037I17 gene                                                        |
| 0.35 | 0.08 | Mm.277585 | App           | Amyloid beta (A4) precursor protein                                               |
| 0.36 | 0.05 | Mm.41     | Atp5o         | ATP synthase, H+ transporting, mitochondrial F1 complex, O subunit                |
| 0.36 | 0.03 | Mm.208883 | Psma5         | Proteasome (prosome, macropain) subunit, alpha type 5                             |
| 0.36 | 0.05 | Mm.262094 | Unc93b1       | Unc-93 homolog B1 (C. elegans)                                                    |
| 0.36 | 0.06 | Mm.43831  | Lgals1        | Lectin, galactose binding, soluble 1                                              |
| 0.36 | 0.10 | Mm.86322  | Tacc2         | Transforming, acidic coiled-coil containing protein 2                             |
| 0.36 | 0.08 | Mm.222887 | Als2cr3       | Amyotrophic lateral sclerosis 2 (juvenile) chromosome region, candidate 3 (human) |
| 0.36 | 0.09 | Mm.140158 | Cyp51         | Cytochrome P450, 51                                                               |
| 0.36 | 0.07 | Mm.373791 | LOC14433      | Similar to glyceraldehyde-3-phosphate dehydrogenase                               |

|      |      |           |               |                                                                                  |
|------|------|-----------|---------------|----------------------------------------------------------------------------------|
| 0.36 | 0.07 | Mm.29852  | D11Bwg0434e   | DNA segment, Chr 11, Brigham & Women's Genetics 0434 expressed                   |
| 0.36 | 0.10 | Mm.4494   | Pkp1          | Plakophilin 1                                                                    |
| 0.36 | 0.06 | Mm.379151 | Gltscr2       | Glioma tumor suppressor candidate region gene 2                                  |
| 0.36 | 0.06 | Mm.172411 | D18Wsu98e     | Thioredoxin-like 4                                                               |
| 0.36 | 0.09 | Mm.29807  | Uchl1         | Ubiquitin carboxyl-terminal hydrolase PGP9.5                                     |
| 0.36 | 0.07 | Mm.9277   | Pla2g7        | Phospholipase A2, group VII (platelet-activating factor acetylhydrolase, plasma) |
| 0.36 | 0.08 | Mm.29683  | Ndufb7        | NADH dehydrogenase (ubiquinone) 1 beta subcomplex, 7                             |
| 0.36 | 0.04 | Mm.29488  | Crybb1        | Crystallin, beta B1                                                              |
| 0.36 | 0.10 | Mm.192991 | Mt1           | Metallothionein 1                                                                |
| 0.36 | 0.11 | Mm.16106  | C4            | Complement component 4 (within H-2S) (C4)                                        |
| 0.36 | 0.11 | Mm.6095   | Cstb          | Cystatin B                                                                       |
| 0.36 | 0.10 | Mm.44227  | Ndufs8        | NADH dehydrogenase (ubiquinone) Fe-S protein 8                                   |
| 0.36 | 0.07 | Mm.3841   | Cox8b         | Cytochrome c oxidase, subunit VIIIb                                              |
| 0.36 | 0.13 | Mm.188669 | 2600009E05Rik | hypothetical protein LOC77006 [Mus musculus],                                    |
| 0.36 | 0.08 | Mm.21728  | Psm7          | Proteasome (prosome, macropain) subunit, alpha type 7                            |
| 0.36 | 0.14 | Mm.30051  | Rnf10         | Ring finger protein 10                                                           |
| 0.36 | 0.11 | Mm.288567 | Hbb-b1        | Hemoglobin, beta adult major chain                                               |
| 0.36 | 0.09 | Mm.235132 | Zfp3611       | Zinc finger protein 36, C3H type-like 1                                          |
| 0.36 | 0.08 | Mm.27210  | G6pdx         | Glucose-6-phosphate dehydrogenase X-linked                                       |
| 0.36 | 0.07 | Mm.280842 | Hnrpab        | Heterogeneous nuclear ribonucleoprotein A/B                                      |
| 0.36 | 0.10 | AK083524  | not found     | pol polyprotein                                                                  |
| 0.36 | 0.05 | Mm.262447 | Rab4b         | RAB4B, member RAS oncogene family                                                |
| 0.36 | 0.10 | Mm.12758  | Fkbp4         | FK506 binding protein 4                                                          |
| 0.36 | 0.10 | Mm.208883 | Psm5          | Proteasome (prosome, macropain) subunit, alpha type 5                            |
| 0.36 | 0.05 | Mm.142822 | Gopc          | Golgi associated PDZ and coiled-coil motif containing                            |
| 0.37 | 0.12 | Mm.358714 | Hsbp1         | Heat shock factor binding protein 1                                              |

|      |      |           |               |                                                                                  |
|------|------|-----------|---------------|----------------------------------------------------------------------------------|
| 0.37 | 0.07 | Mm.379119 | Uqcr          | Ubiquinol-cytochrome c reductase (6.4kD) subunit                                 |
| 0.37 | 0.07 | Mm.243085 | Mglap         | Matrix Gla protein                                                               |
| 0.37 | 0.11 | Mm.325816 | Ppib          | Peptidylprolyl isomerase B                                                       |
| 0.37 | 0.12 | Mm.194735 | not found     | 13 days embryo liver cDNA, RIKEN full-length enriched library, clone:I920064F20  |
| 0.37 | 0.11 | Mm.2326   | Mif           | Mus musculus macrophage migration inhibitory factor                              |
| 0.37 | 0.12 | Mm.238973 | Atp5b         | ATP synthase, H <sup>+</sup> transporting mitochondrial F1 complex, beta subunit |
| 0.37 | 0.07 | Mm.294263 | Rp1h          | Mus musculus photoreceptor specific protein PSP                                  |
| 0.37 | 0.12 | Mm.237103 | 2610507B11Rik | E1 protein                                                                       |
| 0.37 | 0.09 | Mm.196110 | Hba-a1        | Hemoglobin alpha, adult chain 1                                                  |
| 0.37 | 0.09 | Mm.383215 | 1810010N17Rik | Coiled coil domain containing 28B                                                |
| 0.37 | 0.09 | Mm.216135 | Pkm2          | Pyruvate kinase, muscle                                                          |
| 0.37 | 0.05 | Mm.215860 | Ascc3l1       | MKIAA0788 protein                                                                |
| 0.37 | 0.05 | Mm.22109  | Acyp2         | Acylphosphatase 2, muscle type                                                   |
| 0.37 | 0.05 | Mm.21158  | Frap1         | FK506 binding protein 12-rapamycin associated protein 1                          |
| 0.37 | 0.06 | Mm.289832 | Psmc3         | Proteasome (prosome, macropain) 26S subunit, ATPase 3                            |
| 0.37 | 0.10 | Mm.256925 | Dbnl          | Drebrin-like                                                                     |
| 0.37 | 0.04 | Mm.287826 | Sfrs9         | Splicing factor, arginine/serine rich 9                                          |
| 0.37 | 0.07 | Mm.6974   | Krt1-14       | Keratin complex 1, acidic, gene 14                                               |
| 0.37 | 0.07 | Mm.7838   | Ccndbp1       | Cyclin D-type binding-protein 1                                                  |
| 0.37 | 0.12 | Mm.102278 | Scamp5        | Secretory carrier membrane protein 5                                             |
| 0.37 | 0.09 | Mm.216227 | Csnk1d        | Casein kinase 1, delta, transcript variant 2                                     |
| 0.38 | 0.10 | Mm.68170  | Kcnj14        | Potassium inwardly-rectifying channel, subfamily J, member 14                    |
| 0.38 | 0.07 | Mm.374791 | Gnat2         | Guanine nucleotide binding protein, alpha transducing 2                          |
| 0.38 | 0.09 | Mm.38951  | Sucla2        | ATP-specific succinyl-CoA synthetase beta subunit                                |
| 0.38 | 0.07 | Mm.76694  | 1110067D22Rik | RIKEN cDNA 1110067D22 gene                                                       |
| 0.38 | 0.08 | Mm.272139 | Nosip         | Nosip: Nitric oxide synthase interacting protein                                 |



|      |      |           |               |                                                                        |
|------|------|-----------|---------------|------------------------------------------------------------------------|
| 0.38 | 0.11 | Mm.318    | 2010107E04Rik | RIKEN cDNA 2010107E04 gene                                             |
| 0.38 | 0.06 | Mm.257073 | Chn1          | Chimerin (chimaerin) 1                                                 |
| 0.38 | 0.01 | Mm.227598 | Prkcbp1       | Protein kinase C binding protein 1                                     |
| 0.38 | 0.05 | Mm.200497 | Hadha         | Hydroxyacyl-Coenzyme A dehydrogenase                                   |
| 0.38 | 0.02 | Mm.5264   | Fez1          | Fasciculation and elongation protein zeta 1                            |
| 0.38 | 0.11 | Mm.3459   | Dbp           | D site albumin promoter binding protein                                |
| 0.38 | 0.08 | Mm.203866 | 2310047C17Rik | AHNAK nucleoprotein (desmoyokin)                                       |
| 0.38 | 0.06 | Mm.134151 | BC027072      | CDNA sequence BC027072                                                 |
| 0.38 | 0.08 | Mm.379127 | Psmc6         | Proteasome (prosome, macropain) 26S subunit, ATPase, 6                 |
| 0.38 | 0.05 | Mm.131708 | Rpe65         | Retinal pigment epithelium 65                                          |
| 0.38 | 0.11 | Mm.5260   | Slc6a1        | Solute carrier family 6 (neurotransmitter transporter, GABA), member 1 |
| 0.38 | 0.07 | Mm.260539 | Psmc11        | Proteasome (prosome, macropain) 26S subunit, non-ATPase, 11            |
| 0.38 | 0.12 | Mm.29473  | Copz1         | Coatamer protein complex, subunit zeta 1                               |
| 0.38 | 0.07 | Mm.273177 | Krt1-19       | Keratin complex 1, acidic, gene 19                                     |
| 0.38 | 0.08 | Mm.5718   | Pik4ca        | Phosphatidylinositol 4-kinase, catalytic, alpha polypeptide            |
| 0.38 | 0.08 | Mm.29582  | Psmc4         | Psmc4: Proteasome (prosome, macropain) 26S subunit, ATPase, 4          |
| 0.38 | 0.11 | Mm.27098  | Snx8          | Sorting nexin 8                                                        |
| 0.38 | 0.04 | Mm.86589  | 2310005N03Rik | RIKEN cDNA 2310005N03 gene                                             |
| 0.38 | 0.09 | Mm.209385 | Lpp           | Mortality factor 4 like 1                                              |
| 0.38 | 0.09 | Mm.334206 | Uqcrc2        | Ubiquinol cytochrome c reductase core protein 2                        |
| 0.38 | 0.05 | Mm.102627 | 0610009D07Rik | RIKEN cDNA 0610009D07 gene                                             |
| 0.38 | 0.06 | Mm.648    | Prnp          | Prion protein                                                          |
| 0.38 | 0.03 | Mm.57035  | Itga3         | Integrin alpha 3                                                       |
| 0.38 | 0.04 | Mm.205830 | Gdi1          | Guanosine diphosphate (GDP) dissociation inhibitor 1                   |
| 0.38 | 0.04 | Mm.306026 | Epb4.112      | 4.1G protein (Epb4.112 gene) splice variant                            |
| 0.38 | 0.11 | Mm.43397  | Mrpl54        | Mitochondrial ribosomal protein L54                                    |

|      |      |           |               |                                                                                                  |
|------|------|-----------|---------------|--------------------------------------------------------------------------------------------------|
| 0.38 | 0.03 | Mm.199223 | Dhx32         | DEAH (Asp-Glu-Ala-His) box polypeptide 32                                                        |
| 0.38 | 0.07 | Mm.46431  | 2310002J15Rik | RIKEN cDNA 2310002J15 gene                                                                       |
| 0.38 | 0.09 | Mm.222867 | Dap           | Death-associated protein                                                                         |
| 0.38 | 0.13 | Mm.806    | Cd81          | CD 81 antigen                                                                                    |
| 0.39 | 0.09 | Mm.31018  | Cyb5          | Cytochrome b-5                                                                                   |
| 0.39 | 0.08 | Mm.272722 | Tusc3         | Tumor suppressor candidate 3,                                                                    |
| 0.39 | 0.10 | Mm.112632 | 6330583M11Rik | RIKEN cDNA 6330583M11 gene                                                                       |
| 0.39 | 0.09 | Mm.293142 | Etohi2        | Ribonuclease III                                                                                 |
| 0.39 | 0.05 | Mm.379086 | Smarce1       | SWI/SNF related, matrix associated, actin dependent regulator of chromatin, subfamily e, memb. 1 |
| 0.39 | 0.05 | Mm.31008  | BC022146      | Echinoderm microtubule associated protein like 3                                                 |
| 0.39 | 0.07 | Mm.140    | Ppp1r14b      | Protein phosphatase 1, regulatory (inhibitor) subunit 14B                                        |
| 0.39 | 0.02 | Mm.56769  | Dcn           | Dcn: Decorin                                                                                     |
| 0.39 | 0.06 | Mm.6994   | Hadh2         | Hydroxyacyl-Coenzyme A dehydrogenase type II                                                     |
| 0.39 | 0.06 | Mm.4234   | Fkbp2         | FK506 binding protein 2                                                                          |
| 0.39 | 0.06 | Mm.277713 | D3Jfr1        | Cold shock domain containing E1, RNA binding                                                     |
| 0.39 | 0.10 | Mm.29241  | AA407659      | Expressed sequence AA407659                                                                      |
| 0.39 | 0.10 | Mm.240850 | Bcas1         | Breast carcinoma amplified sequence 1                                                            |
| 0.39 | 0.08 | Mm.31008  | BC022146      | Echinoderm microtubule associated protein like 3                                                 |
| 0.39 | 0.08 | Mm.291868 | Tomm7         | Translocase of outer mitochondrial membrane 7 homolog                                            |
| 0.39 | 0.07 | Mm.25263  | 2700029M09Rik | hypothetical protein LOC72612                                                                    |
| 0.39 | 0.04 | Mm.226941 | Gpsm2         | G-protein signalling modulator 2 (AGS3-like, C. elegans)                                         |
| 0.39 | 0.06 | Mm.261037 | 4732493F09Rik | RIKEN cDNA 4732493F09 gene                                                                       |
| 0.39 | 0.10 | Mm.378955 | Kpna2         | Karyopherin (importin) alpha 2                                                                   |
| 0.39 | 0.06 | Mm.332667 | Anapc5        | Anaphase-promoting complex subunit 5                                                             |
| 0.40 | 0.07 | Mm.116418 | A730008L03Rik | A730008L03Rik: RIKEN cDNA A730008L03 gene                                                        |
| 0.40 | 0.08 | Mm.2570   | C1qb          | Complement component 1, q subcomponent, beta polypeptide                                         |

|      |      |           |               |                                                   |
|------|------|-----------|---------------|---------------------------------------------------|
| 0.40 | 0.01 | Mm.356778 | Cpsf3         | Cleavage and polyadenylation specificity factor 3 |
| 0.40 | 0.03 | Mm.271765 | Arrdc3        | Arrestin domain containing 3                      |
| 0.40 | 0.07 | Mm.158971 | 1110001J03Rik | RIKEN cDNA 1110001J03 gene                        |
| 0.40 | 0.04 | Mm.258939 | Abr           | Active BCR-related gene, transcript variant 2     |
| 0.40 | 0.04 | Mm.24642  | AW146242      | Expressed sequence AW146242                       |
| 0.40 | 0.05 | Mm.350054 | Tnnt3         | Troponin T3, skeletal, fast                       |
| 0.40 | 0.05 | Mm.20294  | Sephs2        | Selenophosphate synthetase 2                      |
| 0.40 | 0.09 | Mm.275411 | E130016I23Rik | RIKEN cDNA E130016I23 gene                        |
| 0.40 | 0.01 | Mm.20805  | 2410141M05Rik | RIKEN cDNA 2410141M05 gene                        |
| 0.40 | 0.09 | Mm.330055 | Aldh9a1       | Aldehyde dehydrogenase 9, subfamily A1            |
| 0.40 | 0.07 | Mm.379204 | Ppp2cz        | Protein phosphatase 1J                            |
| 0.40 | 0.11 | Mm.46053  | Fgfbp1        | Fibroblast growth factor binding protein 1        |
| 0.40 | 0.07 | Mm.22220  | Fabp3         | Fatty acid binding protein 3, muscle and heart    |
| 0.40 | 0.03 | Mm.29814  | Trappc4       | Trappc4: Trafficking protein particle complex 4   |
| 0.40 | 0.08 | Mm.279287 | 4930504E06Rik | RIKEN cDNA 4930504E06 gene                        |
| 0.41 | 0.04 | Mm.150231 | Hnrpd         | Heterogeneous nuclear ribonucleoprotein           |
| 0.41 | 0.10 | Mm.4325   | Klf4          | Kruppel-like factor 4 (gut)                       |
| 0.41 | 0.05 | Mm.277599 | Stub1         | STIP1 homology and U-Box containing protein 1     |
| 0.41 | 0.07 | Mm.235137 | Scye1         | Small inducible cytokine subfamily E, member 1    |
| 0.41 | 0.04 | Mm.290022 | Eif4b         | Eukaryotic translation initiation factor 4B       |
| 0.41 | 0.06 | Mm.296158 | 1300006C19Rik | RIKEN cDNA 1300006C19 gene                        |
| 0.41 | 0.08 | Mm.207619 | Iqgap1        | IQ motif containing GTPase activating protein 1   |
| 0.41 | 0.05 | Mm.282039 | Acly          | ATP citrate lyase                                 |
| 0.41 | 0.04 | Mm.324550 | 1300002A08Rik | RIKEN cDNA 1300002A08 gene                        |
| 0.41 | 0.01 | Mm.24174  | Aars          | Alanyl-tRNA synthetase                            |
| 0.41 | 0.07 | Mm.367230 | 2700023B17Rik | RIKEN cDNA 2700023B17 gene                        |

|      |      |           |               |                                                                           |
|------|------|-----------|---------------|---------------------------------------------------------------------------|
| 0.42 | 0.06 | Mm.293599 | Arvcf         | Armadillo repeat gene deleted in velo-cardio-facial syndrome              |
| 0.42 | 0.05 | Mm.295330 | Usp7          | Ubiquitin specific peptidase 7                                            |
| 0.42 | 0.08 | Mm.249479 | Dncic2        | Dynein, cytoplasmic, intermediate chain 2                                 |
| 0.42 | 0.04 | Mm.28327  | 2510049I19Rik | RIKEN cDNA 2510049I19 gene                                                |
| 0.42 | 0.06 | Mm.244226 | 1110020G09Rik | hypothetical protein LOC68646 [Mus musculus]                              |
| 0.42 | 0.07 | Mm.300083 | 4933434E20Rik | RIKEN cDNA 4933434E20 gene                                                |
| 0.42 | 0.04 | Mm.251255 | Ddx1          | DEAD (Asp-Glu-Ala-Asp) box polypeptide 1                                  |
| 0.42 | 0.06 | Mm.1825   | Tff2          | Trefoil factor 2 (spasmolytic protein 1)                                  |
| 0.42 | 0.06 | Mm.29027  | Sparc11       | SPARC-like 1 (mast9, hevin)                                               |
| 0.43 | 0.04 | Mm.292297 | Zfp110        | Zinc finger protein 110                                                   |
| 0.43 | 0.05 | Mm.2948   | H2-Ke2        | H2-K region expressed gene 2                                              |
| 0.43 | 0.05 | Mm.347369 | 0610012G03Rik | RIKEN cDNA 0610012G03 gene                                                |
| 0.43 | 0.02 | Mm.37516  | Dnajb11       | Apobec-1 binding protein 2                                                |
| 0.43 | 0.07 | Mm.227583 | Atp2a2        | Sarco/endoplasmic reticulum Ca <sup>2+</sup> ATPase; SERCA2b              |
| 0.44 | 0.03 | Mm.235283 | Dpysl2        | Dihydropyrimidinase-like 2                                                |
| 0.44 | 0.03 | Mm.156742 | 9930023K05Rik | RIKEN cDNA 9930023K05 gene                                                |
| 0.44 | 0.04 | Mm.230924 | 2610208M17Rik | RIKEN cDNA 2610208M17 gene                                                |
| 0.44 | 0.02 | Mm.247036 | Xpa           | Xeroderma pigmentosum, complementation group A                            |
| 0.45 | 0.02 | Mm.293255 | 1110012L19Rik | RIKEN cDNA 1110012L19 gene                                                |
| 0.45 | 0.01 | Mm.319719 | Rpl13         | Ribosomal protein L13                                                     |
| 0.45 | 0.04 | Mm.166524 | Ddx47         | DEAD (Asp-Glu-Ala-Asp) box polypeptide 47                                 |
| 0.45 | 0.01 | Mm.256034 | Cct3          | Chaperonin subunit 3 (gamma)                                              |
| 0.45 | 0.03 | Mm.272792 | Gstm2         | Glutathione S-transferase, mu 2                                           |
| 0.45 | 0.05 | Mm.41773  | Tmem9         | Transmembrane protein 9                                                   |
| 0.45 | 0.02 | Mm.34046  | Sepm          | Selenoprotein M                                                           |
| 0.46 | 0.02 | Mm.207432 | Atp1a2        | ATPase, Na <sup>+</sup> /K <sup>+</sup> transporting, alpha 2 polypeptide |

|      |      |           |               |                                                           |
|------|------|-----------|---------------|-----------------------------------------------------------|
| 0.46 | 0.03 | Mm.258773 | Zmynd11       | Zinc finger, MYND domain containing 11                    |
| 0.47 | 0.02 | Mm.254495 | Tmed4         | Transmembrane emp24 protein transport domain containing 4 |
| 0.48 | 0.02 | Mm.262480 | 2010012F05Rik | Chromatin modifying protein 4B                            |

---

<sup>a</sup> RNA was isolated as described in Material and Methods. Aliquots of total RNA isolated from the different tissues were detection-labeled and hybridized on the mouse genomic microarray using a service provided by NimbleGen System Inc. (Madison, WI). The microarray contained the 37,364 genes and covered the entire mouse transcriptome as represented by the University of California, Santa Cruz database (build HG 17), using a minimum of 11 probes per gene. The expression of genes was normalized according to probe signal, and the average signal for each gene was normalized for each sample replicate.

Array data for samples across the whole study were normalized by NimbleGen Systems Inc. (Madison, WI), using the robust multichip analysis feature of the data analysis package contained in <http://www.bioconductor.org>. Project-wide spreadsheets of robust multichip analysis results were processed as described in Materials and Methods. Changes in gene expression greater than or equal to 2-fold for increases or less than or equal to 0.5-fold for decreases were considered significant. The differentially expressed genes were then exported from Access as Excel files and were annotated using Lucidyx Searcher software (<http://www.lucidyx.com>).

<sup>b</sup> Standard Deviation.

<sup>c</sup> UniGene Cluster ID or Gene Bank accession number was used for Gene description.

**Table. S2 Significant changes in the gene expression after 9-*cis*-retinyl acetate treatment in the liver<sup>a</sup>.**

| Changes<br>in the<br>expression       | S.D. <sup>b</sup> | Description <sup>c</sup> | Symbol    | Gene name                                         |
|---------------------------------------|-------------------|--------------------------|-----------|---------------------------------------------------|
| <b>Increased (more than 2.0 fold)</b> |                   |                          |           |                                                   |
| 2.67                                  | 0.78              | Mm.246377                | Tubb2     | Tubulin, beta 2                                   |
| 2.67                                  | 1.67              | Mm.18064                 | G6pc      | Glucose-6-phosphatase, catalytic                  |
| 2.48                                  | 0.97              | Mm.288567                | Hbb-b1    | Hemoglobin, beta adult major chain                |
| 2.41                                  | 0.99              | Mm.246377                | Tubb2     | Tubulin, beta 2                                   |
| 2.16                                  | 0.74              | Mm.374868                | BC021917  | CDNA sequence BC021917                            |
| 2.01                                  | 0.79              | Mm.133179                | Cyp3a44   | Cytochrome P450, CYP3A                            |
| 2.01                                  | 0.62              | Mm.379132                | Bxdc1     | Brix domain containing 1                          |
| <b>Decreased (less than 0.5)</b>      |                   |                          |           |                                                   |
| 0.25                                  | 0.06              | Mm.200370                | Upp2      | Uridine phosphorylase 2                           |
| 0.29                                  | 0.25              | NM_133779                | not found | Mus musculus phosphatidylinositol glycan, class T |
| 0.36                                  | 0.09              | Mm.290578                | Alas1     | Aminolevulinic acid synthase 1                    |
| 0.41                                  | 0.09              | Mm.275975                | Gys2      | Glycogen synthase 2                               |
| 0.42                                  | 0.05              | Mm.3459                  | Dbp       | D site albumin promoter binding protein           |
| 0.43                                  | 0.16              | Mm.300                   | Car3      | Carbonic anhydrase 3                              |
| 0.43                                  | 0.14              | Mm.350638                | Npm1      | Nucleophosmin 1                                   |
| 0.44                                  | 0.22              | Mm.237772                | Mup1      | Major urinary protein 1                           |
| 0.44                                  | 0.19              | Mm.290578                | Alas1     | Aminolevulinic acid synthase 1                    |
| 0.45                                  | 0.17              | Mm.237772                | Mup1      | Major urinary protein 1                           |

|      |      |           |               |                                                                                |
|------|------|-----------|---------------|--------------------------------------------------------------------------------|
| 0.45 | 0.15 | Mm.211211 | 2310032D16Rik | RIKEN cDNA 2310032D16 gene                                                     |
| 0.45 | 0.14 | Mm.28585  | Thrsp         | Thyroid hormone responsive SPOT14 homolog (Rattus)                             |
| 0.46 | 0.14 | U58494    | not found     | Mus musculus melanoma cell-derived intracisternal A-particle                   |
| 0.46 | 0.10 | Mm.272770 | Usp2          | Ubiquitin specific peptidase 2                                                 |
| 0.48 | 0.17 | Mm.254067 | H2-Ab1        | Histocompatibility 2, class II antigen A, beta 1                               |
| 0.48 | 0.13 | Mm.4676   | Slc7a2        | Solute carrier family 7 (cationic amino acid transporter, y+ system), member 2 |
| 0.48 | 0.22 | Mm.33240  | Eva1          | Epithelial V-like antigen 1                                                    |
| 0.49 | 0.04 | Mm.299    | Inmt          | Indolethylamine N-methyltransferase                                            |
| 0.49 | 0.07 | Mm.290079 | Serpina6      | Serine (or cysteine) peptidase inhibitor, clade A, member 6                    |
| 0.50 | 0.07 | Mm.347377 | Mthfs         | 5, 10-methenyltetrahydrofolate synthetase                                      |

---

## Significant changes in the gene expression after 9-*cis*-retinyl acetate treatment in the kidney<sup>a</sup>.

| Changes in the expression             | S.D. <sup>b</sup> | Description <sup>c</sup> | Symbol        | Gene name                                                    |
|---------------------------------------|-------------------|--------------------------|---------------|--------------------------------------------------------------|
| <b>Increased (more than 2.0 fold)</b> |                   |                          |               |                                                              |
| 4.93                                  | 1.57              | Mm.6824                  | Sult1d1       | Sulfotransferase family 1D, member 1                         |
| 4.33                                  | 1.55              | Mm.333124                | Igk-V8        | Immunoglobulin lambda chain, mAb 667                         |
| 4.15                                  | 1.27              | S74315                   | not found     | gag=antigen LEC-A                                            |
| 4.13                                  | 0.93              | Mm.1022                  | Cdc42         | Cell division cycle 42 homolog ( <i>S. cerevisiae</i> )      |
| 4.08                                  | 1.51              | Mm.333124                | Igk-V8        | Immunoglobulin lambda chain, mAb 667                         |
| 3.96                                  | 0.57              | U58494                   | not found     | Mus musculus melanoma cell-derived intracisternal A-particle |
| 3.89                                  | 1.04              | AK083524                 | not found     | Mus musculus 9 days embryo whole body cDNA                   |
| 3.75                                  | 0.58              | Mm.41337                 | Akr1c18       | Aldo-keto reductase family 1, member C18                     |
| 3.69                                  | 1.50              | Mm.28480                 | Fkbp3         | FK506 binding protein 3                                      |
| 3.64                                  | 1.16              | Mm.333124                | Igk-V8        | Immunoglobulin lambda chain, mAb 667                         |
| 3.52                                  | 0.52              | Mm.294159                | 0610011D08Rik | Cytidylate kinase                                            |
| 3.51                                  | 1.19              | U58494                   | not found     | Mus musculus melanoma cell-derived intracisternal A-particle |
| 3.47                                  | 0.53              | AK088963                 | not found     | Mus musculus 2 days neonate thymus thymic cells              |
| 3.40                                  | 1.26              | Mm.333124                | Igk-V8        | Immunoglobulin lambda chain, mAb 667                         |
| 3.38                                  | 0.45              | Mm.122725                | Mgea5         | Meningioma expressed antigen 5 (hyaluronidase)               |
| 3.33                                  | 0.53              | Mm.1909                  | Gbp4          | Guanylate nucleotide binding protein 4                       |
| 3.25                                  | 0.88              | U58494                   | not found     | Mus musculus melanoma cell-derived intracisternal A-particle |
| 3.21                                  | 0.83              | AK077613                 | not found     | Mus musculus 8 days embryo whole body cDNA                   |
| 3.19                                  | 0.75              | Mm.28449                 | B230219D22Rik | RIKEN cDNA B230219D22 gene                                   |



|      |      |           |               |                                                                                                |
|------|------|-----------|---------------|------------------------------------------------------------------------------------------------|
| 3.19 | 0.75 | Mm.171304 | 2810417D08Rik | RIKEN cDNA 2810417D08 gene                                                                     |
| 3.15 | 0.24 | M10062    | not found     | Mouse IgE-binding factor                                                                       |
| 3.05 | 0.80 | Mm.277585 | App           | Amyloid beta (A4) precursor protein                                                            |
| 3.05 | 0.37 | Mm.30088  | Clpx          | ClpX protein                                                                                   |
| 3.05 | 0.50 | Mm.38445  | Tmod3         | Tropomodulin 3                                                                                 |
| 3.04 | 0.52 | Mm.76554  | Mpv17l        | Mpv17 transgene, kidney disease mutant-like                                                    |
| 3.04 | 0.92 | Mm.171304 | 2810417D08Rik | RIKEN cDNA 2810417D08 gene                                                                     |
| 3.02 | 0.58 | U16669    | not found     | Mus musculus clone CCD39 LINE-1 element ORF1                                                   |
| 3.01 | 0.61 | Mm.281804 | Slc15a2       | Solute carrier family 15 (H <sup>+</sup> /peptide transporter), member 2                       |
| 2.98 | 0.47 | Mm.225096 | Itga6         | Integrin alpha 6                                                                               |
| 2.97 | 0.78 | Mm.30176  | Kcnj16        | Potassium inwardly-rectifying channel, subfamily J, member 16                                  |
| 2.96 | 0.21 | AK088963  | not found     | Mus musculus 2 days neonate thymus thymic cells cDNA                                           |
| 2.90 | 0.61 | Mm.181973 | Acbd5         | Acyl-Coenzyme A binding domain containing 5                                                    |
| 2.90 | 0.63 | Mm.196290 | 5830411E10Rik | RIKEN cDNA 5830411E10 gene                                                                     |
| 2.89 | 0.59 | Mm.18628  | Cd36          | CD36 antigen                                                                                   |
| 2.89 | 0.79 | Mm.369129 | 5031439A09Rik | RIKEN cDNA 5031439A09 gene                                                                     |
| 2.85 | 0.58 | Mm.38953  | Slco1a6       | Solute carrier organic anion transporter family, member 1a6                                    |
| 2.82 | 0.57 | Mm.6442   | Pkd2          | Polycystic kidney disease 2                                                                    |
| 2.81 | 0.43 | Mm.297903 | 9030406N13Rik | Nuclear receptor coactivator 7                                                                 |
| 2.79 | 0.53 | Mm.135619 | Slc33a1       | Solute carrier family 33 (acetyl-CoA transporter), member 1                                    |
| 2.76 | 0.44 | Mm.218639 | Npn3          | Sulfiredoxin 1 homolog ( <i>S. cerevisiae</i> )                                                |
| 2.74 | 0.54 | Mm.277626 | Ube1c         | Ubiquitin-activating enzyme E1C                                                                |
| 2.74 | 0.46 | Mm.122430 | 6130401J04Rik | RIKEN cDNA 6130401J04 gene                                                                     |
| 2.73 | 0.38 | Mm.292016 | Sfrs7         | Splicing factor, arginine/serine-rich 7                                                        |
| 2.73 | 0.71 | Mm.196581 | Mapk1         | Mitogen activated protein kinase 1                                                             |
| 2.73 | 0.60 | AF303451  | not found     | Mus musculus endogenous virus intracisternal A-particle clone T-25-Adh-1, long terminal repeat |

|      |      |           |               |                                                                     |
|------|------|-----------|---------------|---------------------------------------------------------------------|
| 2.73 | 0.63 | Mm.25148  | Atp6ap2       | ATPase, H <sup>+</sup> transporting, lysosomal accessory protein 2  |
| 2.72 | 0.57 | Mm.87773  | Tra1          | Tumor rejection antigen gp96                                        |
| 2.72 | 0.44 | Mm.27764  | Rnf128        | E3 ubiquitin ligase                                                 |
| 2.72 | 0.34 | Mm.261004 | Uchl5         | Ubiquitin carboxyl-terminal esterase L5                             |
| 2.70 | 0.25 | Mm.233009 | Rap1b         | RAS related protein 1b                                              |
| 2.68 | 0.30 | AK083524  | not found     | Mus musculus 9 days embryo whole body cDNA                          |
| 2.68 | 0.55 | Mm.2238   | Eif3s10       | Eukaryotic translation initiation factor 3, subunit 10 (theta)      |
| 2.67 | 0.10 | Mm.217787 | Atp6v1a1      | ATPase, H <sup>+</sup> transporting, V1 subunit A1                  |
| 2.66 | 0.33 | Mm.152941 | Usp16         | Ubiquitin specific peptidase 16                                     |
| 2.66 | 0.56 | Mm.270259 | Sept7         | MKIAA4020 protein                                                   |
| 2.66 | 0.51 | AK083524  | not found     | Mus musculus 9 days embryo whole body cDNA                          |
| 2.65 | 0.55 | Mm.196371 | Ccar1         | Cell division cycle and apoptosis regulator 1                       |
| 2.64 | 0.17 | Mm.328673 | Cct8          | Chaperonin subunit 8 (theta)                                        |
| 2.63 | 0.38 | Mm.240224 | Rab2          | RAB2, member RAS oncogene family                                    |
| 2.63 | 0.63 | AK008468  | not found     | Mus musculus adult male small intestine cDNA                        |
| 2.56 | 0.40 | Mm.37558  | Lrrk2         | Leucine-rich repeat kinase 2                                        |
| 2.56 | 0.45 | Mm.240066 | Psme4         | Proteasome (prosome, macropain) activator subunit 4                 |
| 2.55 | 0.31 | Mm.286127 | Elov17        | ELOVL family member 7, elongation of long chain fatty acids (yeast) |
| 2.54 | 0.35 | U58494    | not found     | Mus musculus melanoma cell-derived intracisternal A-particle        |
| 2.52 | 0.26 | Mm.351579 | 1110005A23Rik | RIKEN cDNA 1110005A23 gene                                          |
| 2.49 | 0.25 | Mm.9806   | 1810036I24Rik | RIKEN cDNA 1810036I24 [Mus musculus]                                |
| 2.48 | 0.25 | S74315    | not found     | gag=antigen LEC-A                                                   |
| 2.48 | 0.27 | Mm.139176 | Col4a3        | Alpha 3 collagen IV                                                 |
| 2.48 | 0.45 | Mm.2718   | Eef1b2        | Eukaryotic translation elongation factor 1 beta 2                   |
| 2.45 | 0.28 | Mm.316652 | Hmgcr         | 3-hydroxy-3-methylglutaryl-Coenzyme A reductase                     |
| 2.43 | 0.30 | Mm.30166  | Ncb5or        | NADPH cytochrome B5 oxidoreductase                                  |

|      |      |           |               |                                                                                     |
|------|------|-----------|---------------|-------------------------------------------------------------------------------------|
| 2.42 | 0.24 | AK088963  | not found     | Mus musculus 2 days neonate thymus thymic cells cDNA                                |
| 2.42 | 0.31 | Mm.10160  | Cggbp1        | CGG triplet repeat binding protein 1                                                |
| 2.41 | 0.29 | Mm.205190 | Mll5          | Myeloid/lymphoid or mixed-lineage leukemia 5                                        |
| 2.41 | 0.02 | Mm.38193  | Zfp292        | Zinc finger protein 292                                                             |
| 2.40 | 0.32 | Mm.289103 | Zfp451        | Zinc finger protein 451                                                             |
| 2.39 | 0.08 | U58494    | not found     | Mus musculus melanoma cell-derived intracisternal A-particle                        |
| 2.39 | 0.09 | Mm.289248 | Tceb1         | Transcription elongation factor B (SIII), polypeptide 1                             |
| 2.39 | 0.24 | Mm.275158 | Lsm8          | LSM8 homolog, U6 small nuclear RNA associated ( <i>S. cerevisiae</i> )              |
| 2.39 | 0.18 | Mm.195753 | Pole4         | Polymerase (DNA-directed), epsilon 4 (p12 subunit)                                  |
| 2.38 | 0.31 | Mm.1517   | Sybl1         | Synaptobrevin like 1                                                                |
| 2.37 | 0.07 | Mm.216574 | 5033428A16Rik | RIKEN cDNA 5033428A16 gene                                                          |
| 2.36 | 0.21 | U58494    | not found     | Mus musculus melanoma cell-derived intracisternal A-particle                        |
| 2.35 | 0.32 | Mm.281011 | Slk           | Ste20-related kinase SMAK                                                           |
| 2.34 | 0.31 | Mm.159453 | Rchyl         | Androgen receptor N-terminal-interacting protein ARNIP                              |
| 2.32 | 0.24 | Mm.102136 | Sdccag33      | Serologically defined colon cancer antigen 33                                       |
| 2.30 | 0.26 | Mm.170855 | B230380D07Rik | MKIAA1164 protein                                                                   |
| 2.30 | 0.17 | U58494    | not found     | Mus musculus melanoma cell-derived intracisternal A-particle                        |
| 2.29 | 0.26 | Mm.102136 | Sdccag33      | Serologically defined colon cancer antigen 33                                       |
| 2.29 | 0.20 | Mm.38912  | 2410129H14Rik | RIKEN cDNA 2410129H14 gene                                                          |
| 2.29 | 0.03 | Mm.1314   | Mdfid         | Kidney cell line derived transcript 1                                               |
| 2.26 | 0.17 | Mm.25263  | 2700029M09Rik | PREDICTED: hypothetical protein LOC72612 [Mus musculus]                             |
| 2.25 | 0.14 | Mm.33970  | Aasdhppt      | Amino adipate-semialdehyde dehydrogenase-phosphopantetheinyl transferase            |
| 2.23 | 0.11 | Mm.276381 | Tnpo3         | MKIAA4133 protein                                                                   |
| 2.19 | 0.14 | Mm.23998  | Ythdf2        | YTH domain family 2                                                                 |
| 2.17 | 0.07 | Mm.229141 | Arfgef1       | ADP-ribosylation factor guanine nucleotide-exchange factor 1(brefeldin A-inhibited) |
| 2.15 | 0.09 | Mm.41891  | 2310034L04Rik | Yip1 domain family, member 4                                                        |

|      |      |           |           |                                                              |
|------|------|-----------|-----------|--------------------------------------------------------------|
| 2.12 | 0.09 | Mm.386773 | Serpina1a | Serine (or cysteine) peptidase inhibitor, clade A, member 1a |
| 2.06 | 0.05 | U58494    | not found | Mus musculus melanoma cell-derived intracisternal A-particle |

**Decreased (less than 0.5)**

|      |      |           |          |                                             |
|------|------|-----------|----------|---------------------------------------------|
| 0.36 | 0.09 | Mm.377112 | Phxr5    | Per-hexamer repeat gene 5                   |
| 0.38 | 0.07 | Mm.390    | Ctla4    | Cytotoxic T-lymphocyte-associated protein 4 |
| 0.42 | 0.02 | Mm.220312 | AI836376 | Expressed sequence AI836376                 |

---

## Significant changes in the phototransduction related gene expression after 9-*cis*-retinyl acetate treatment in the eye<sup>a</sup>.

| Changes in the expression        | S.D. <sup>b</sup> | Description <sup>c</sup> | Symbol | Gene name                                                  |
|----------------------------------|-------------------|--------------------------|--------|------------------------------------------------------------|
| <b>Decreased (less than 0.5)</b> |                   |                          |        |                                                            |
| 0.05                             | 0.02              | Mm.2965                  | Rho    | Rhodopsin                                                  |
| 0.06                             | 0.04              | Mm.328846                | Rps2   | Phosphodiesterase 6A, cGMP-specific, rod, alpha            |
| 0.07                             | 0.05              | Mm.47709                 | Pdc    | Phosducin                                                  |
| 0.08                             | 0.02              | Mm.328846                | Rps2   | Phosphodiesterase 6A, cGMP-specific, rod, alpha            |
| 0.09                             | 0.03              | Mm.284853                | Gnat1  | Guanine nucleotide binding protein, alpha transducing 1    |
| 0.12                             | 0.07              | Mm.151562                | Rbp3   | Retinol binding protein 3, interstitial                    |
| 0.13                             | 0.04              | Mm.16224                 | Guca1a | Guanylate cyclase activator 1a (retina)                    |
| 0.14                             | 0.05              | Mm.1372                  | Pde6b  | Phosphodiesterase 6B, cGMP, rod receptor, beta polypeptide |
| 0.18                             | 0.01              | Mm.235863                | Rcvrn  | Recoverin                                                  |
| 0.18                             | 0.13              | Mm.290622                | Pde6h  | Phosphodiesterase 6H, cGMP-specific, cone, gamma           |
| 0.18                             | 0.05              | Mm.347492                | Rom1   | Rod outer segment membrane protein 1                       |
| 0.19                             | 0.10              | Mm.274373                | Rdh12  | Retinol dehydrogenase 12                                   |
| 0.21                             | 0.03              | Mm.3918                  | Abca4  | ATP-binding cassette, sub-family A (ABC1), member 4        |
| 0.27                             | 0.08              | Mm.291370                | Rds    | Retinal degeneration, slow (retinitis pigmentosa 7)        |
| 0.28                             | 0.08              | Mm.378896                | Cnga1  | cGMP-gated cation channel protein                          |

**Significant changes in the retinoid cycle related gene expression after 9-*cis*-retinyl acetate treatment in the eye<sup>a</sup>.**

| <b>Changes in the expression</b> |                                |               |                                               |  |
|----------------------------------|--------------------------------|---------------|-----------------------------------------------|--|
| <b>S.D.<sup>b</sup></b>          | <b>Description<sup>c</sup></b> | <b>Symbol</b> | <b>Gene name</b>                              |  |
| <b>Decreased (less than 0.5)</b> |                                |               |                                               |  |
| 0.12                             | Mm.151562                      | Rbp3          | Retinol binding protein 3, interstitial       |  |
| 0.17                             | Mm.41653                       | Cralbp        | Cellular retinoic acid binding protein I      |  |
| 0.17                             | Mm.41653                       | Rlbp1         | Retinaldehyde binding protein 1               |  |
| 0.18                             | Mm.274373                      | Rdh12         | Retinol dehydrogenase 12                      |  |
| 0.19                             | Mm.20460                       | Rgr           | Retinal G protein coupled receptor            |  |
| 0.26                             | Mm.274376                      | Rdh10         | Retinol dehydrogenase 10 (all-trans)          |  |
| 0.30                             | Mm.279741                      | Rbp1          | Retinol binding protein 1, cellular           |  |
| 0.38                             | Mm.131708                      | Rpe65         | Retinal pigment epithelium 65                 |  |
| 0.47                             | Mm.250866                      | Raldh1        | Aldehyde dehydrogenase family 1, subfamily A1 |  |

**Significant changes function categorized enzymes related gene expression after 9-*cis*-retinyl acetate treatment in the eye<sup>a</sup>.**

| <b>Function Category</b> | <b>Changes in the expression</b>     | <b>S.D.<sup>b</sup></b>              | <b>Description<sup>c</sup></b> | <b>Symbol</b> | <b>Gene name</b> |                                                           |
|--------------------------|--------------------------------------|--------------------------------------|--------------------------------|---------------|------------------|-----------------------------------------------------------|
| <b>apoptosis</b>         | <b>Increased<br/>(more than 2.0)</b> | 2.63                                 | 0.17                           | Mm.287857     | Plagl1           | Lost on transformation protein 1                          |
|                          |                                      | 2.47                                 | 0.25                           | Mm.298242     | Lgals12          | Lectin, galactose binding, soluble 12                     |
|                          |                                      | <b>Decreased<br/>(less than 0.5)</b> |                                |               |                  |                                                           |
|                          |                                      | 0.19                                 | 0.04                           | Mm.277585     | App              | Amyloid beta (A4) precursor protein                       |
|                          |                                      | 0.21                                 | 0.05                           | Mm.74605      | Faim             | Fas-apoptosis inhibitory molecule                         |
|                          |                                      | 0.26                                 | 0.08                           | Mm.544        | Pea15            | Phosphoprotein enriched in astrocytes 15                  |
|                          |                                      | 0.29                                 | 0.11                           | Mm.313076     | Ppp1r13b         | Protein phosphatase 1, regulatory (inhibitor) subunit 13B |
|                          |                                      | 0.29                                 | 0.04                           | Mm.28405      | Sgk              | Serum/glucocorticoid regulated kinase                     |
|                          |                                      | 0.33                                 | 0.14                           | Mm.133037     | Egln3            | EGL nine homolog 3 (C. elegans)                           |
|                          |                                      | 0.34                                 | 0.08                           | Mm.43871      | Trim35           | Tripartite motif-containing 35                            |
|                          |                                      | 0.34                                 | 0.11                           | Mm.319038     | Dad1             | Defender against cell death 1                             |
|                          |                                      | 0.34                                 | 0.12                           | Mm.21855      | Pglyrp1          | Peptidoglycan recognition protein 1                       |
|                          |                                      | 0.38                                 | 0.09                           | Mm.222867     | Dap              | Death-associated protein                                  |
| <b>immune response</b>   | <b>Increased<br/>(more than 2.0)</b> | 2.56                                 | 0.34                           | Mm.261270     | Ifi203           | Interferon activated gene 203                             |

|      |      |           |               |                               |
|------|------|-----------|---------------|-------------------------------|
| 2.34 | 0.08 | Mm.142187 | A230083G16Rik | RIKEN cDNA A230083G16 gene    |
| 2.22 | 0.17 | Mm.8655   | Cfh           | Complement component factor h |

---

**Decreased  
(less than 0.5)**

---

|      |      |           |         |                                                          |
|------|------|-----------|---------|----------------------------------------------------------|
| 0.29 | 0.11 | Mm.16106  | C4      | Complement component 4 (within H-2S)                     |
| 0.30 | 0.05 | Mm.283217 | C2      | Complement component 2 (within H-2S)                     |
| 0.30 | 0.10 | Mm.830    | Psme1   | Proteasome (prosome, macropain) 28 subunit, alpha        |
| 0.34 | 0.12 | Mm.21855  | Pglyrp1 | Peptidoglycan recognition protein 1                      |
| 0.37 | 0.10 | Mm.256925 | Dbnl    | Drebrin-like                                             |
| 0.40 | 0.08 | Mm.2570   | C1qb    | Complement component 1, q subcomponent, beta polypeptide |

---

**DNA binding protein    Increased  
(more than 2.0)**

---

|      |      |           |               |                                                    |
|------|------|-----------|---------------|----------------------------------------------------|
| 4.21 | 0.93 | Mm.320593 | Dach1         | DACH protein                                       |
| 3.37 | 0.79 | Mm.103382 | Ppfibp1       | MKIAA1230 protein                                  |
| 3.08 | 0.53 | Mm.42140  | Zfp53         | Zinc finger protein 53                             |
| 3.01 | 0.92 | Mm.195092 | Zfp260        | Zinc finger protein 260                            |
| 2.98 | 0.63 | Mm.137011 | Tbx22         | T-box 22                                           |
| 2.77 | 0.38 | Mm.302938 | Ddx3y         | DEAD (Asp-Glu-Ala-Asp) box polypeptide 3, Y-linked |
| 2.75 | 0.41 | Mm.212411 | Phf14         | PHD finger protein 14                              |
| 2.69 | 0.10 | Mm.57223  | Hells         | Helicase, lymphoid specific                        |
| 2.68 | 0.20 | Mm.8062   | Zic4          | Zinc finger protein of the cerebellum 4            |
| 2.66 | 0.28 | Mm.260376 | 4921524P20Rik | WD repeat domain 56                                |
| 2.63 | 0.48 | Mm.79760  | Dach2         | Dachshund 2 (Drosophila)                           |
| 2.61 | 0.05 | Mm.20000  | Dhx9          | DEAH (Asp-Glu-Ala-His) box polypeptide 9           |
| 2.59 | 0.31 | Mm.276279 | A830025F02Rik | Zinc finger protein 667                            |
| 2.57 | 0.13 | Mm.38249  | Fem1c         | MKIAA1785 protein                                  |



|      |      |           |               |                                          |
|------|------|-----------|---------------|------------------------------------------|
| 2.37 | 0.11 | Mm.269995 | Etv6          | Ets variant gene 6 (TEL oncogene)        |
| 2.28 | 0.20 | Mm.30466  | Trps1         | Trichorhinophalangeal syndrome I (human) |
| 2.26 | 0.23 | Mm.5011   | Zfp37         | Zinc finger protein 37                   |
| 2.25 | 0.07 | Mm.255890 | Zic3          | Zinc finger protein of the cerebellum 3  |
| 2.15 | 0.11 | Mm.32118  | 2810021J22Rik | RIKEN cDNA 2810021J22 gene               |

---

**Decreased  
(less than 0.5)**

---

|      |      |           |               |                                                                        |
|------|------|-----------|---------------|------------------------------------------------------------------------|
| 0.07 | 0.01 | Mm.275810 | Rps10         | Ribosomal protein S10                                                  |
| 0.10 | 0.04 | Mm.319660 | Hmgn2         | High mobility group nucleosomal binding domain 2                       |
| 0.10 | 0.06 | Mm.261676 | Hist1h2bc     | Histone 1, H2bc                                                        |
| 0.12 | 0.04 | Mm.290251 | Cnbp1         | Cellular nucleic acid binding protein 1                                |
| 0.17 | 0.07 | Mm.236513 | Map3k12       | Mitogen activated protein kinase kinase kinase 12                      |
| 0.22 | 0.08 | Mm.279861 | 1810060D16Rik | Polymerase (RNA) II (DNA directed) polypeptide F                       |
| 0.25 | 0.17 | Mm.279821 | Eif4a1        | Eukaryotic translation initiation factor 4A1                           |
| 0.28 | 0.09 | Mm.134516 | Otx2          | Orthodenticle homolog 2 (Drosophila)                                   |
| 0.28 | 0.07 | Mm.45044  | Srf           | Serum response factor                                                  |
| 0.29 | 0.15 | Mm.221275 | Rtn1          | Reticulon 1, transcript variant 1                                      |
| 0.29 | 0.11 | Mm.313076 | Ppp1r13b      | Protein phosphatase 1, regulatory (inhibitor) subunit 13B              |
| 0.30 | 0.08 | Mm.261570 | Gtf2i         | Transcription factor TFII-I-alpha, complete cds, alternatively spliced |
| 0.30 | 0.10 | Mm.330538 | Slc24a5       | Solute carrier family 24, member 5                                     |
| 0.31 | 0.07 | Mm.258204 | Nsep1         | Mus musculus similar to nuclease sensitive element binding protein 1   |
| 0.31 | 0.09 | Mm.270278 | Tef           | Thyrotroph embryonic factor, transcript variant 2                      |
| 0.34 | 0.07 | Mm.15701  | Trim28        | Tripartite motif protein 28                                            |
| 0.35 | 0.09 | Mm.335942 | Set           | SET translocation                                                      |
| 0.35 | 0.07 | Mm.289915 | Ddb1          | Damaged-DNA recognition protein 1                                      |
| 0.35 | 0.07 | Mm.275446 | Drap1         | Dr1 associated protein 1 (negative cofactor 2 alpha)                   |

|      |      |           |         |                                                       |
|------|------|-----------|---------|-------------------------------------------------------|
| 0.36 | 0.09 | Mm.235132 | Zfp3611 | Zinc finger protein 36, C3H type-like 1               |
| 0.36 | 0.05 | Mm.142822 | Gopc    | Golgi associated PDZ and coiled-coil motif containing |
| 0.37 | 0.05 | Mm.215860 | Ascc311 | MKIAA0788 protein                                     |
| 0.38 | 0.11 | Mm.3459   | Dbp     | D site albumin promoter binding protein               |
| 0.41 | 0.10 | Mm.4325   | Klf4    | Kruppel-like factor 4 (gut)                           |
| 0.41 | 0.07 | Mm.235137 | Scye1   | Small inducible cytokine subfamily E, member 1        |
| 0.43 | 0.04 | Mm.292297 | Zfp110  | Zinc finger protein 110                               |
| 0.44 | 0.02 | Mm.247036 | Xpa     | Xeroderma pigmentosum, complementation group A        |
| 0.46 | 0.03 | Mm.258773 | Zmynd11 | Zinc finger, MYND domain containing 11                |

---

**Nucleotic acid binding**      **Increased (less than 2.0)**

---

|      |      |           |               |                                                    |
|------|------|-----------|---------------|----------------------------------------------------|
| 3.43 | 0.92 | Mm.133101 | Shprh         | SNF2 histone linker PHD RING helicase              |
| 3.08 | 0.53 | Mm.42140  | Zfp53         | Zinc finger protein 53                             |
| 3.01 | 0.92 | Mm.195092 | Zfp260        | Zinc finger protein 260                            |
| 2.77 | 0.38 | Mm.302938 | Ddx3y         | DEAD (Asp-Glu-Ala-Asp) box polypeptide 3, Y-linked |
| 2.69 | 0.10 | Mm.57223  | Hells         | Helicase, lymphoid specific                        |
| 2.68 | 0.20 | Mm.8062   | Zic4          | Zinc finger protein of the cerebellum 4            |
| 2.63 | 0.17 | Mm.287857 | Plag1         | Lost on transformation protein 1                   |
| 2.61 | 0.05 | Mm.20000  | Dhx9          | DEAH (Asp-Glu-Ala-His) box polypeptide 9           |
| 2.59 | 0.31 | Mm.276279 | Zfp667        | Zinc finger protein 667                            |
| 2.56 | 0.20 | Mm.34606  | Hrb2          | HIV-1 Rev binding protein 2                        |
| 2.28 | 0.20 | Mm.30466  | Trps1         | Trichorhinophalangeal syndrome I (human)           |
| 2.26 | 0.23 | Mm.5011   | Zfp37         | Zinc finger protein 37                             |
| 2.25 | 0.07 | Mm.255890 | Zic3          | Zinc finger protein of the cerebellum 3            |
| 2.15 | 0.11 | Mm.32118  | 2810021J22Rik | RIKEN cDNA 2810021J22 gene                         |

---

**Decreased**

---

(less than 0.5)

---

|      |      |           |               |                                                                     |
|------|------|-----------|---------------|---------------------------------------------------------------------|
| 0.12 | 0.04 | Mm.290251 | Cnbp1         | Cellular nucleic acid binding protein 1                             |
| 0.16 | 0.10 | Mm.236868 | Rps3          | Ribosomal protein S3                                                |
| 0.17 | 0.07 | Mm.236513 | Map3k12       | Mitogen activated protein kinase kinase kinase 12                   |
| 0.22 | 0.06 | Mm.30066  | Rpl8          | Ribosomal protein L8                                                |
| 0.22 | 0.04 | Mm.17964  | Khdrbs3       | KH domain containing, RNA binding, signal transduction associated 3 |
| 0.23 | 0.14 | Mm.126043 | Bat1a         | HLA-B-associated transcript 1A                                      |
| 0.25 | 0.17 | Mm.279821 | Eif4a1        | Eukaryotic translation initiation factor 4A1                        |
| 0.27 | 0.08 | Mm.23758  | Poldip3       | Polymerase (DNA-directed), delta interacting protein 3              |
| 0.28 | 0.06 | Mm.273496 | Zfr           | Zinc finger RNA binding protein                                     |
| 0.29 | 0.08 | Mm.220038 | Ddx5          | DEAD (Asp-Glu-Ala-Asp) box polypeptide 5                            |
| 0.30 | 0.12 | Mm.155783 | 1300018I05Rik | RIKEN cDNA 1300018I05 gene                                          |
| 0.30 | 0.10 | Mm.330538 | Slc24a5       | Solute carrier family 24, member 5                                  |
| 0.30 | 0.09 | Mm.275413 | Tdrd7         | Tudor domain containing 7                                           |
| 0.33 | 0.06 | Mm.155896 | Hnrpa2b1      | Heterogeneous nuclear ribonucleoprotein A2/B1                       |
| 0.34 | 0.07 | Mm.297196 | 2810055E05Rik | RIKEN cDNA 2810055E05 gene                                          |
| 0.35 | 0.07 | Mm.289915 | Ddb1          | Damaged-DNA recognition protein 1                                   |
| 0.36 | 0.09 | Mm.235132 | Zfp361l       | Zinc finger protein 36, C3H type-like 1                             |
| 0.36 | 0.07 | Mm.280842 | Hnrpab        | Heterogeneous nuclear ribonucleoprotein A/B                         |
| 0.36 | 0.05 | Mm.142822 | Gopc          | Golgi associated PDZ and coiled-coil motif containing               |
| 0.37 | 0.04 | Mm.287826 | Sfrs9         | Splicing factor, arginine/serine rich 9                             |
| 0.41 | 0.10 | Mm.4325   | Klf4          | Kruppel-like factor 4 (gut)                                         |
| 0.41 | 0.04 | Mm.290022 | Eif4b         | Eukaryotic translation initiation factor 4B                         |
| 0.41 | 0.01 | Mm.24174  | Aars          | Alanyl-tRNA synthetase                                              |
| 0.42 | 0.04 | Mm.251255 | Ddx1          | DEAD (Asp-Glu-Ala-Asp) box polypeptide 1                            |
| 0.43 | 0.04 | Mm.292297 | Zfp110        | Zinc finger protein 110                                             |

|                      | 0.45                   | 0.04 | Mm.166524 | Ddx47  | DEAD (Asp-Glu-Ala-Asp) box polypeptide 47       |
|----------------------|------------------------|------|-----------|--------|-------------------------------------------------|
| <b>structural</b>    |                        |      |           |        |                                                 |
| <b>consistent of</b> | <b>Decreased</b>       |      |           |        |                                                 |
| <b>eye lens</b>      | <b>(less than 0.5)</b> |      |           |        |                                                 |
|                      | 0.08                   | 0.03 | Mm.1228   | Cryaa  | Alpha-A-crystallin (Cryaa gene)                 |
|                      | 0.09                   | 0.02 | Mm.22830  | Cryba1 | Crystallin, beta A1                             |
|                      | 0.14                   | 0.04 | Mm.6253   | Crygs  | Crystallin, gamma S                             |
|                      | 0.19                   | 0.08 | Mm.275937 | Bfsp1  | Beaded filament structural protein in lens-CP94 |
|                      | 0.19                   | 0.12 | Mm.298885 | Crygb  | Crystallin, gamma C                             |
|                      | 0.21                   | 0.07 | Mm.335403 | Bfsp2  | Beaded filament structural protein 2, phakinin  |
|                      | 0.21                   | 0.02 | Mm.178    | Cryab  | Crystallin, alpha B                             |
|                      | 0.28                   | 0.07 | Mm.40324  | Cryba4 | Crystallin, beta A4                             |
|                      | 0.30                   | 0.11 | Mm.31625  | Mip    | Major intrinsic protein of eye lens fiber       |
|                      | 0.32                   | 0.16 | Mm.267027 | Lim2   | Lens intrinsic membrane protein 2               |
|                      | 0.36                   | 0.04 | Mm.29488  | Crybb1 | Crystallin, beta B1                             |

a: RNA was isolated as described in Material and Methods. Aliquots of total RNA isolated from the different tissues were detection-labeled and hybridized on the mouse genomic microarray using a service provided by NimbleGen System Inc. (Madison, WI). The microarray contained the 37,364 genes and covered the entire mouse transcriptome as represented by the University of California, Santa Cruz database (build HG 17), using a minimum of 11 probes per gene. The expression of genes was normalized according to probe signal, and the average signal for each gene was normalized for each sample replicate.

Array data for samples across the whole study were normalized by NimbleGen Systems Inc. (Madison, WI), using the robust multichip analysis feature of the data analysis package contained in <http://www.bioconductor.org>. Project-wide spreadsheets of robust multichip analysis results were processed as described in Materials and Methods. Changes in gene expression greater than or equal to 2-fold for increases or less than

or equal to 0.5-fold for decreases were considered significant. The differentially expressed genes were then exported from Access as Excel files and were annotated using Lucidyx Searcher software (<http://www.lucidyx.com>).

b: Standard Deviation

c: UniGene Cluster ID or Gene Bank accession number was used for Gene description.
